# Supplementary material for: Comparison of analytical techniques to explain variability in stored drinking water quality and microbial hand contamination of female caregivers in Tanzania
Source: Royal Society of Chemistry journal article supplement (doi:10.1039/c8em00460a), 2019-01-01
Supplement: c8em00460a1.xlsx [file c8em00460a1.xlsx]

## Sheet: TEST_HandFIBmodelforCT_7FEB2019
BL_RESP_WORK	BL_DIARRHEA_ANYONE_YN	BL_weekly_exp_per1000Tsh	BL_HOUSE_DIRT_FLOOR	BL_BAGAMOYO_TOWN_YN	BL_INFANT_YN	BL_PRIVATE_TOILET	BL_VISIBLE_FECES_YN	BL_LATRINE_ROOF_YN	BL_LATRINE_CEMENT_FLOOR_YN	BL_LATRINE_SEPTIC_YN	BL_LATRINE_PIT_COVER_YN	BL_LATRINE_FLIES_YN	BL_KIDS_OPEN_DEFECATION_YN	BL_RESP_EDUCATION_YN	BL_HW_STATION_YN	BL_LASTHW_1hrYN	BL_DRY_AFTER_HW_YN	BL_WET_HANDS_4_HW_JERRYCAN_TAP_YN	BL_HS_ACTIVITY_CAT19	BL_H_EC_CAT
0	0	8.75	0	1	0	1	0	0	1	0	0	0	0	1	0	1	0	0	1	1
1	0	1.11111	0	1	1	0	0	0	1	0	0	0	1	1	0	0	1	0	4	1
1	0	7.41667	0	1	0	0	0	1	1	1	0	0	0	1	0	0	0	1	4	1
0	0	7	1	1	1	0	1	0	0	0	0	0	0	1	0	0	0	0	4	1
0	0	#NULL!	0	1	1	1	0	1	1	0	0	0	1	1	0	0	1	0	1	1
0	0	6.66667	0	1	0	0	0	1	1	0	0	0	0	1	0	0	1	0	4	1
0	0	7	0	1	0	0	0	0	0	0	0	0	1	1	0	#NULL!	1	0	4	1
0	0	#NULL!	0	1	0	0	0	0	1	0	0	0	1	1	0	0	1	0	2	1
0	0	1.33333	0	1	0	0	0	0	0	0	1	0	0	1	0	1	0	0	1	1
0	0	3.33333	0	1	1	0	0	0	1	0	0	0	1	1	0	1	1	0	1	1
1	0	3.5	1	1	0	0	0	0	0	0	0	0	1	1	0	0	0	0	2	1
1	0	0.9	1	1	0	1	0	0	0	0	0	0	0	1	0	0	0	0	2	1
1	0	0.57175	0	1	0	1	#NULL!	#NULL!	#NULL!	#NULL!	#NULL!	#NULL!	1	1	0	1	0	1	4	1
#NULL!	#NULL!	#NULL!	0	1	0	0	0	1	1	1	0	0	0	#NULL!	0	1	0	0	3	1
1	0	1.2	1	1	0	1	0	0	0	0	0	0	0	0	0	1	0	0	2	1
1	0	8.75	0	1	0	1	0	0	0	0	0	0	0	0	0	0	0	0	4	1
0	0	5	1	1	0	0	0	0	0	0	0	0	1	0	0	1	1	0	2	1
0	0	0.75	0	1	0	0	0	0	0	0	0	0	0	1	0	0	0	0	4	1
0	0	1	1	1	0	1	0	0	0	0	1	0	1	0	0	0	0	0	4	0
1	0	3.05	0	1	0	1	0	0	0	0	0	0	1	1	0	0	0	0	4	1
1	0	7.77778	1	1	0	1	0	0	0	0	1	0	0	0	0	1	0	0	2	1
1	0	9.21875	0	1	0	1	0	0	1	0	0	0	0	1	0	1	0	0	1	1
0	1	9.33333	1	1	0	0	#NULL!	#NULL!	#NULL!	#NULL!	#NULL!	#NULL!	1	0	0	1	0	0	1	1
0	0	7	1	1	1	0	0	0	0	0	0	0	0	0	0	#NULL!	0	0	4	1
1	0	5.7	0	1	1	1	0	1	1	0	0	0	0	1	0	0	0	0	2	1
1	0	5	0	1	1	1	0	0	0	0	0	0	0	1	0	0	0	0	4	1
0	0	5	1	1	0	0	0	1	1	0	0	0	1	1	0	1	0	0	4	#NULL!
0	0	2.8	1	1	0	1	0	1	0	0	0	0	1	1	0	0	0	0	4	1
0	0	3.52273	0	1	0	1	0	1	1	0	0	0	0	1	0	0	1	0	4	1
1	0	11.9167	0	1	1	0	0	0	1	0	1	0	0	1	0	0	1	0	4	1
0	0	7	0	1	0	0	0	1	1	0	0	0	0	1	0	1	1	0	2	1
1	0	3.88889	0	1	0	1	0	1	1	0	1	0	0	1	0	0	1	0	4	1
1	0	1.75	1	1	0	1	0	0	0	0	1	0	1	1	0	1	1	0	2	1
1	0	5.25	0	1	0	0	0	0	0	0	0	0	1	0	0	0	1	0	4	1
0	0	2	0	1	1	1	0	0	0	0	0	0	1	1	0	0	1	1	4	1
1	0	7	0	1	0	1	0	0	0	0	0	0	1	0	0	1	1	0	4	1
1	0	7	1	1	0	1	0	0	0	0	0	0	1	1	0	0	1	0	1	1
1	0	7.5	1	1	0	1	0	0	0	0	0	0	1	1	0	0	1	0	1	1
1	0	9.8	1	1	0	1	0	0	0	0	0	0	1	1	0	0	1	0	2	1
0	0	4.66667	1	1	0	1	0	0	0	0	0	0	1	0	0	0	1	0	4	1
0	0	4.6875	0	1	1	0	0	0	1	0	0	0	1	0	0	0	1	0	1	1
1	0	12.0833	0	1	1	0	0	1	1	0	0	0	0	1	0	0	1	0	4	1
1	0	4.9	1	1	0	0	0	0	1	0	0	0	0	1	0	0	1	0	4	0
0	0	9.75	0	1	0	0	0	0	0	0	0	0	0	1	0	0	1	0	4	1
1	0	12.6875	0	1	0	1	0	1	1	1	0	0	0	1	0	1	0	0	4	1
0	0	7.77778	0	1	1	1	0	0	1	0	0	0	0	1	0	0	0	0	4	0
0	0	5.44444	0	1	1	0	0	0	0	0	0	0	0	1	0	0	0	0	4	1
0	0	4.375	1	1	0	1	0	0	0	0	0	0	1	1	0	0	0	0	4	1
1	0	13.4167	0	1	0	0	0	1	1	1	0	0	1	0	0	0	0	0	4	1
0	0	16.3333	0	1	0	0	0	1	1	0	0	0	1	1	0	0	0	0	4	1
0	0	7.04545	0	1	1	1	0	0	1	0	0	0	0	1	0	1	0	0	4	1
0	0	4.2	1	1	0	1	0	0	0	0	0	0	1	1	0	0	0	0	4	1
0	0	2.91667	0	1	0	1	0	0	1	0	0	0	0	1	0	0	0	0	4	1
0	0	7.25	0	1	0	1	0	0	1	0	0	0	1	1	0	1	0	0	4	0
0	0	3	1	1	1	1	0	0	0	0	0	0	1	0	0	0	0	0	4	1
1	0	4.66667	0	1	0	1	0	0	0	0	0	0	0	1	0	0	0	0	4	1
1	0	7.75	0	1	0	0	0	0	1	0	0	0	0	1	0	0	1	0	4	1
0	0	10	0	1	0	1	0	1	1	0	0	0	1	1	0	0	1	0	4	1
0	0	3.66667	0	1	1	0	0	1	1	0	0	0	0	1	0	1	1	0	2	1
1	0	4.53571	0	1	1	0	1	1	1	0	0	0	0	1	0	1	1	0	2	1
0	0	8.4	1	1	0	1	0	0	0	0	0	0	0	1	0	0	1	0	4	1
0	0	5.25	0	1	0	0	0	0	0	0	0	0	1	0	0	1	1	0	2	1
1	0	8.6	0	1	0	0	0	0	1	0	0	0	0	1	0	0	1	0	4	1
0	0	7.75	0	1	0	0	1	0	1	0	0	0	1	1	0	0	1	0	2	0
0	0	9.6875	0	1	0	0	1	1	1	0	0	0	0	1	0	0	1	0	1	1
0	0	12.7083	0	1	0	1	0	1	1	1	1	0	0	1	0	0	1	0	2	1
0	1	5.25	0	1	1	0	0	1	1	0	1	0	1	1	0	0	1	0	4	1
0	0	5.83333	1	1	0	1	0	0	0	0	0	0	1	0	0	0	1	0	4	1
0	0	8.16667	0	1	0	0	0	1	1	0	0	0	1	1	0	0	1	1	4	1
0	0	9.33333	0	1	0	0	0	0	0	0	0	0	0	0	0	1	1	1	1	0
1	0	6.125	1	1	0	1	0	0	0	0	1	0	1	1	0	0	1	1	4	1
0	0	#NULL!	0	1	1	1	0	1	1	0	0	0	0	1	0	0	1	1	4	1
1	0	5.33333	0	1	0	1	0	1	1	0	0	0	1	1	0	0	1	1	4	0
0	0	3.5	0	1	1	0	0	0	0	0	0	0	1	1	0	0	1	1	4	1
0	0	7.5	0	1	1	0	0	0	0	0	1	1	1	1	0	1	1	1	4	1
0	0	7	0	1	0	1	0	0	0	0	0	1	1	0	0	0	1	0	4	1
0	0	3.88889	0	1	0	1	0	0	0	0	1	1	0	1	0	1	1	0	3	1
0	0	10.5	0	1	1	1	0	0	1	0	0	0	1	0	0	1	1	0	4	1
0	0	3.18182	0	1	0	1	1	0	1	0	0	0	1	0	0	0	1	1	4	1
0	0	3.5	1	1	0	1	0	0	0	0	0	0	1	0	0	0	1	0	4	1
0	0	5	1	1	0	1	0	0	0	0	1	0	1	0	0	0	1	0	4	1
0	0	3.5	1	1	1	1	0	0	0	0	0	0	1	0	0	0	1	0	4	1
0	0	2.5	0	1	1	1	0	0	0	0	0	0	0	1	0	0	0	0	4	1
0	0	7.3125	0	1	0	0	0	0	1	0	0	0	0	1	0	1	0	0	4	0
1	0	12.4375	0	1	0	0	0	0	1	0	0	0	0	0	0	1	0	0	1	0
0	0	3.18182	1	1	1	1	0	0	0	0	0	0	0	1	0	0	0	0	4	0
0	0	5	1	0	1	1	0	1	0	0	0	0	1	1	0	0	0	0	4	1
1	0	5.6	1	0	0	1	0	0	0	0	0	0	1	1	0	0	0	0	4	1
1	0	5	0	0	1	1	0	0	1	0	0	0	0	1	0	1	0	0	4	1
0	0	7	1	0	0	1	0	0	0	0	0	0	1	0	0	0	0	0	4	1
0	0	4.2	1	0	1	1	0	0	0	0	0	0	1	1	0	0	0	0	4	1
0	0	4.375	0	0	0	1	0	0	0	0	0	0	1	1	0	0	0	0	3	1
1	0	4.2	1	0	0	0	#NULL!	#NULL!	#NULL!	#NULL!	#NULL!	#NULL!	1	0	0	0	0	0	4	1
1	0	5	0	0	1	1	0	0	1	0	0	0	0	1	0	1	0	0	1	1
0	0	11.6667	0	0	0	1	0	0	1	0	0	0	1	1	0	#NULL!	0	0	4	1
0	0	3	1	0	0	1	0	1	0	0	0	0	1	1	0	1	0	0	4	1
0	0	4.2	0	0	0	0	0	1	0	0	0	0	1	1	0	#NULL!	0	0	4	1
0	0	5.25	1	0	1	0	0	1	1	0	0	0	1	1	0	0	0	1	2	1
1	0	7	1	0	0	0	0	1	0	0	0	0	1	1	0	0	0	0	4	0
0	0	3.5	0	0	1	1	0	1	1	0	1	0	1	1	0	0	1	0	2	1
0	0	7	1	0	0	1	0	0	0	0	1	0	1	0	0	0	1	0	4	0
0	0	7	1	0	1	0	#NULL!	#NULL!	#NULL!	#NULL!	#NULL!	#NULL!	1	1	0	0	1	0	4	0
0	0	3.5	1	0	0	1	0	0	0	0	1	0	0	1	0	0	1	0	4	0
0	0	10	0	0	0	0	0	0	0	0	0	0	1	1	0	#NULL!	1	0	4	0
0	0	2.625	0	0	1	1	0	0	0	0	0	0	0	1	0	0	1	1	4	1
0	0	4.2	1	0	0	1	0	0	0	0	0	0	1	1	0	0	1	1	4	0
0	0	5.25	1	0	0	1	0	1	0	0	1	0	0	1	0	0	1	0	4	0
0	0	5.25	1	0	0	1	0	1	0	0	1	0	0	1	0	0	1	0	4	1
0	0	8.75	0	0	0	1	0	0	0	0	0	0	1	1	0	0	1	0	4	0
0	0	4	0	0	1	1	0	0	0	0	0	0	1	1	0	0	1	1	2	0
0	0	4.375	1	0	1	1	0	1	0	1	0	0	1	0	0	1	1	1	1	0
0	0	11.6667	0	0	0	1	0	0	0	0	0	0	1	1	0	0	1	1	4	0
0	0	4.2	0	0	0	1	0	1	0	0	1	0	0	1	0	#NULL!	1	1	2	0
0	0	3.5	1	0	1	1	0	1	0	0	1	0	1	1	0	0	1	1	4	0
0	0	8.75	1	0	0	1	0	1	0	0	0	0	1	1	0	0	1	0	4	1
0	0	3.5	1	0	0	1	0	0	0	0	1	0	1	1	0	0	1	1	4	1
0	0	4.2	1	0	1	1	0	0	0	0	1	0	0	0	0	0	1	0	2	1
0	0	5.25	1	0	0	1	0	0	0	0	0	0	1	0	0	0	1	1	4	1
0	0	8.4	1	0	0	0	0	1	0	0	0	0	1	1	0	0	1	1	2	0
0	0	17.5	1	0	1	0	0	1	0	0	0	0	0	1	0	0	1	1	4	1
0	0	9.33333	1	0	0	0	0	0	0	0	0	0	1	0	0	0	1	0	4	0
0	0	6	1	0	0	1	0	0	0	0	0	0	1	0	0	1	1	1	2	1
0	0	5.25	1	0	1	1	1	1	0	0	1	0	1	0	0	0	1	1	4	1
0	0	4.2	1	0	0	#NULL!	0	#NULL!	#NULL!	#NULL!	#NULL!	#NULL!	1	1	0	#NULL!	1	0	3	1
0	0	6.1875	0	0	0	0	0	1	1	0	0	0	1	1	1	1	1	1	4	1
1	0	3.88889	1	0	0	1	0	0	0	0	0	0	1	1	0	0	1	1	4	1
0	0	9.33333	0	0	0	1	0	0	0	0	1	1	1	1	0	0	1	1	1	0
1	1	3.5	1	0	0	#NULL!	1	#NULL!	#NULL!	#NULL!	#NULL!	#NULL!	1	1	0	#NULL!	0	0	2	0
0	0	14	1	0	0	0	0	0	0	0	0	0	1	1	0	0	1	0	4	0
0	0	8.16667	1	0	0	0	0	0	0	0	0	0	0	1	0	#NULL!	0	0	2	1
0	0	12.2917	0	0	0	1	0	1	1	0	0	0	0	1	1	1	1	1	2	1
0	0	5.25	1	0	0	1	0	0	0	0	1	0	1	0	0	1	1	0	2	1
0	0	7	1	0	0	1	0	0	0	0	1	0	1	0	0	0	1	0	3	1
0	0	5.25	0	0	0	1	0	0	0	0	1	0	1	1	0	0	1	1	4	1
0	0	5.25	0	0	1	1	0	0	0	0	1	0	0	1	0	0	1	0	1	1
0	0	4.2	1	0	0	1	0	1	0	0	1	0	1	1	0	1	1	0	4	1
0	0	7	1	0	0	1	0	1	0	0	#NULL!	#NULL!	0	1	1	0	1	1	4	0
0	0	7	0	0	0	1	0	0	0	0	1	0	0	0	0	1	1	1	2	1
0	0	12.25	1	0	0	1	0	0	1	0	0	0	0	0	0	0	1	1	3	1
0	0	5.6	0	0	1	0	0	0	1	0	1	0	0	0	0	0	1	1	4	1
0	0	11.6667	0	0	0	1	0	0	1	0	1	0	0	1	0	0	1	0	2	1
0	0	8.4	1	0	0	1	0	1	0	0	0	0	0	1	0	0	1	1	1	1
0	0	3.5	1	0	0	0	0	0	0	0	0	0	0	0	0	#NULL!	1	0	4	1
1	0	3.5	1	0	0	0	0	0	0	0	1	0	1	0	0	#NULL!	1	0	4	0
1	0	8.4	0	0	0	1	0	1	0	0	1	0	0	1	0	0	1	0	2	0
0	0	7	1	0	0	0	#NULL!	#NULL!	#NULL!	#NULL!	#NULL!	#NULL!	1	1	0	1	1	1	4	0
0	0	7	1	0	0	0	#NULL!	#NULL!	#NULL!	#NULL!	#NULL!	#NULL!	1	0	0	1	1	1	4	0
0	0	7	0	1	0	0	0	0	1	0	0	0	1	1	0	0	1	1	4	0
0	0	4	1	1	0	1	0	1	0	0	0	0	1	0	0	0	1	1	4	0
0	0	4.66667	0	1	0	0	0	0	0	0	0	0	0	1	0	0	1	1	4	1
1	0	5.80357	0	1	0	1	0	0	1	0	0	0	0	1	0	1	1	1	2	0
0	0	5.83333	1	1	0	1	0	0	0	0	0	0	0	1	0	0	1	1	4	0
0	0	7.53571	0	1	0	0	0	0	0	0	1	0	0	0	0	0	1	1	1	0
0	0	5.83333	0	1	1	#NULL!	0	1	0	0	0	0	0	0	0	1	1	1	4	1
0	0	6.1875	0	1	0	0	0	1	1	0	0	0	0	1	0	0	1	1	4	0
0	0	7	1	1	0	0	#NULL!	#NULL!	#NULL!	#NULL!	#NULL!	#NULL!	0	1	0	1	1	1	1	0
0	0	4	0	1	0	1	0	1	0	0	1	0	0	0	0	0	1	1	4	0
0	0	2.8	1	1	0	0	#NULL!	#NULL!	#NULL!	#NULL!	#NULL!	#NULL!	1	0	0	#NULL!	1	0	4	0
0	0	2	0	1	0	0	0	1	1	0	0	0	0	1	1	0	0	0	4	1
0	1	0.8	0	1	0	0	0	0	0	0	1	0	0	0	0	#NULL!	0	0	4	1
1	0	3.5	1	1	0	0	0	0	0	0	0	1	1	0	0	0	0	0	4	1
0	1	#NULL!	1	1	0	0	0	0	0	0	1	0	1	1	0	0	0	0	4	1
1	0	1.5	0	1	1	0	0	1	1	0	0	0	0	1	0	1	1	1	4	0
0	0	2.83333	0	1	0	0	0	0	1	0	0	0	0	1	0	0	1	0	4	1
0	0	#NULL!	#NULL!	1	0	#NULL!	#NULL!	#NULL!	#NULL!	#NULL!	#NULL!	#NULL!	#NULL!	1	#NULL!	#NULL!	#NULL!	#NULL!		1
0	0	47.3333	0	1	0	0	0	0	1	0	0	0	0	1	0	0	0	0	4	1
1	0	0.6875	0	1	0	0	0	0	0	0	0	0	1	0	0	0	1	0	4	1
1	0	1.07143	0	1	0	0	0	1	1	0	0	0	0	1	0	0	1	0	4	0
1	0	1.66667	1	1	0	0	0	0	0	0	0	0	0	1	0	0	1	0	4	1
0	0	11.6667	0	1	0	1	0	1	1	1	1	0	0	1	1	1	1	0	2	0
0	0	5.1875	0	1	0	1	0	0	1	0	1	0	0	1	0	0	1	1	4	0
0	0	10	0	1	0	0	0	0	1	0	1	0	1	1	0	1	1	0	2	1
1	0	0.466667	0	1	0	1	0	0	1	0	0	0	1	1	1	1	1	0	4	1
0	0	13.3333	1	1	0	1	0	0	1	0	0	1	1	0	0	1	1	0	4	0
0	0	8.75	0	1	1	1	0	0	1	0	0	0	0	1	0	0	1	0	4	0
1	0	5	0	1	0	0	0	1	1	0	0	0	0	1	1	0	1	0	3	1
0	0	7	0	1	1	1	0	0	1	0	1	0	1	1	1	1	1	0	1	0
1	0	7	0	1	1	0	0	0	0	0	0	1	1	1	0	1	1	0	4	1
1	0	7	1	1	1	1	0	0	1	0	0	0	0	1	0	0	1	0	4	1
1	0	7	1	1	0	1	0	0	1	0	0	0	1	1	0	0	1	0	4	0
0	0	5	0	1	0	1	0	0	0	0	0	0	1	1	0	1	1	0	4	0
1	0	7	1	1	0	0	0	0	1	0	0	0	0	1	0	0	1	0	4	1
1	0	7	1	1	0	0	0	0	0	0	0	0	0	1	0	0	1	0	4	1
1	0	2.625	1	1	0	1	0	0	0	0	0	0	1	0	0	0	1	0	4	1
1	0	2.1	1	1	0	0	0	0	1	0	1	0	1	0	0	1	1	0	2	1
0	1	8.75	1	1	1	1	0	0	1	0	0	0	0	1	0	1	1	0	1	#NULL!
1	0	2.8	1	1	0	0	0	0	1	0	1	0	1	0	0	0	1	0	4	1
1	1	8	1	1	1	0	0	1	1	0	0	0	0	1	0	0	1	0	4	1
0	0	7	1	1	0	1	0	0	1	0	0	0	0	1	0	0	1	0	4	1
1	0	6.42857	0	1	0	1	0	0	1	0	0	0	0	1	0	0	1	0	4	1
1	1	6.36364	1	1	0	1	0	0	0	0	0	0	1	1	0	0	1	0	4	1
1	0	#NULL!	0	1	1	1	0	0	0	0	0	0	1	1	0	0	1	0	4	1
1	0	10	0	1	0	0	0	0	1	1	0	0	0	1	0	1	0	0	1	0
0	0	9.16667	0	1	0	0	0	1	1	1	0	0	0	1	0	0	1	0	4	1
0	1	6.66667	1	1	1	0	0	0	0	0	0	0	1	1	0	1	0	0	1	0
0	0	3.75	0	1	0	1	0	0	0	0	0	0	1	0	0	1	1	0	1	1
1	0	7.5	1	1	0	1	0	0	0	0	0	1	1	1	0	0	0	0	2	1
0	0	11.6667	1	1	0	0	0	0	0	1	0	1	0	1	0	0	0	0	1	1
0	0	10.25	0	1	1	0	0	1	1	0	0	0	0	1	0	0	0	0	4	0
1	0	6.66667	0	1	1	0	1	0	0	0	0	1	1	0	0	0	0	0	4	1
0	0	4.28571	1	1	0	1	0	0	0	1	0	1	1	1	0	1	1	0	2	1
1	0	3.75	0	1	0	1	0	0	0	0	1	0	0	1	1	1	0	0	4	1
1	0	7	1	1	0	1	0	1	0	0	1	0	0	1	1	0	1	1	4	0
0	0	8.33333	1	1	0	1	0	0	0	0	1	0	1	1	1	0	0	0	2	0
0	0	5	0	1	0	1	0	0	0	0	0	1	0	1	0	0	0	0	4	1
0	0	6	0	1	1	1	0	0	0	0	1	0	1	1	1	0	1	1	4	1
0	0	6	0	1	0	1	0	0	1	0	1	1	0	1	0	0	0	0	1	0
0	0	5	1	1	1	1	0	0	0	0	0	0	0	1	0	1	0	0	2	1
0	0	11.6667	1	1	0	1	0	0	0	0	0	0	1	0	0	1	1	0	4	1
0	1	6.25	1	1	1	1	0	0	0	0	0	0	1	1	0	0	1	0	4	0
0	0	2.33333	1	1	0	1	0	0	0	0	0	0	0	1	0	0	1	0	2	1
0	0	10	1	1	1	1	0	0	0	0	1	0	1	1	0	1	0	0	4	1
0	0	11.6667	1	1	0	0	0	0	1	0	0	0	1	0	1	0	1	0	2	1
1	0	8	1	1	1	1	0	0	1	0	1	0	1	1	1	0	1	0	1	1
0	0	5.16667	0	1	1	0	0	0	1	0	0	0	1	1	0	0	1	0	4	1
1	0	20.8333	0	1	0	1	0	1	1	0	0	0	0	1	1	1	1	1	2	1
0	0	10.625	0	1	0	1	0	1	1	0	0	0	0	1	1	0	0	0	2	0
0	0	70	1	1	0	0	0	0	0	0	0	1	0	1	0	0	0	0	4	1
0	0	2.1	0	1	1	1	0	1	1	0	0	1	1	1	1	0	1	0	4	1
0	0	10.5357	0	1	1	1	0	1	1	0	0	0	0	1	1	0	1	1	4	0
0	1	8.75	1	1	0	1	0	0	0	0	0	1	1	1	0	0	1	0	2	1
0	1	7	0	1	0	1	0	1	1	1	0	0	0	1	0	0	1	0	4	1
1	0	8.79167	0	1	0	1	0	1	1	0	0	0	0	1	1	0	1	0	3	1
0	0	5.41667	0	1	0	0	0	1	1	0	0	1	1	1	0	1	0	0	4	0
0	0	5	1	1	1	1	1	0	0	0	0	1	1	1	0	0	0	0	2	1
0	0	5.5	1	1	1	1	0	0	0	0	0	1	1	1	0	0	1	0	4	0
0	0	0.323	0	1	0	0	0	1	1	0	0	0	1	1	0	0	1	0	1	1
0	0	8.33333	0	1	0	0	0	0	0	1	0	1	0	1	0	0	1	0	4	0
0	0	5.45455	0	1	0	1	0	0	1	0	0	0	1	0	0	0	1	0	1	1
0	0	6	0	1	0	1	0	0	0	1	1	0	0	1	1	0	1	0	1	1
1	0	6.42857	1	1	1	1	0	0	0	0	0	0	1	1	0	0	1	0	2	1
0	0	8	1	1	1	0	0	0	0	0	0	0	1	1	0	1	1	0	3	0
0	0	7	1	1	1	0	0	0	0	0	0	1	1	1	1	0	0	0	4	1
0	0	6	1	1	1	#NULL!	0	#NULL!	#NULL!	#NULL!	#NULL!	#NULL!	1	1	0	0	1	0	4	1
0	0	5.83333	1	1	0	#NULL!	0	#NULL!	#NULL!	#NULL!	#NULL!	#NULL!	1	0	0	0	1	0	4	1
0	0	11.5625	0	1	1	0	0	1	1	1	0	0	0	1	1	0	1	0	4	1
0	0	8.75	0	1	0	0	0	1	1	0	0	0	0	1	1	0	1	1	1	1
0	0	5.95833	0	1	0	0	0	1	1	0	0	0	0	1	1	0	0	0	2	1
0	0	17.875	0	1	0	0	0	0	1	0	0	0	0	1	1	0	1	0	4	1
0	0	8.57143	0	0	1	0	0	1	1	0	1	0	1	1	0	0	1	1	1	1
1	0	8.75	1	0	0	0	0	1	1	0	1	0	0	1	1	0	1	0	4	1
0	0	6.42857	1	0	0	1	0	0	1	0	0	0	1	0	0	1	1	1	1	1
0	0	10	1	0	0	1	0	0	0	0	0	0	0	1	0	#NULL!	1	0	4	0
0	0	8.75	1	0	0	1	0	0	0	0	0	0	0	0	1	0	1	0	3	1
0	0	7	1	0	0	1	0	1	0	1	1	0	0	1	1	0	1	1	4	1
1	0	6.25	1	0	0	1	0	0	0	1	0	0	0	1	1	0	1	0	4	0
0	0	11.6667	1	0	1	0	0	0	0	0	1	1	1	0	0	0	0	0	1	1
1	0	5.71429	0	0	0	1	0	0	0	0	0	1	1	1	1	1	1	0	2	1
1	0	5.71429	0	0	0	1	0	0	0	0	0	1	1	0	1	0	1	0	4	1
0	0	11.6667	1	0	0	1	0	1	0	0	1	0	1	1	0	0	1	0	4	0
0	0	4.28571	1	0	1	1	0	0	0	0	0	1	1	1	0	0	1	0	1	0
0	0	10.5	1	0	0	0	0	0	0	0	0	1	1	0	0	0	0	0	4	0
0	0	3.33333	1	0	1	1	0	1	0	0	0	1	1	1	1	0	1	0	1	0
0	0	8.4	1	0	1	1	0	1	0	0	1	0	1	1	1	0	1	0	4	0
0	0	6	1	0	1	1	0	1	0	0	1	1	1	1	1	0	1	0	4	1
0	0	6.66667	1	0	0	1	0	1	1	0	1	0	1	1	1	1	0	0	1	1
0	0	7	0	0	0	1	0	0	0	0	0	0	1	1	1	0	1	0	2	1
0	0	2.625	1	0	1	1	0	0	0	0	1	0	1	1	0	0	1	0	2	0
0	0	12.8125	0	0	0	1	0	0	1	1	1	0	1	1	1	1	1	0	1	1
0	0	3.5	0	0	0	1	0	1	0	0	1	1	0	1	1	0	1	0	4	1
0	0	5	1	0	0	1	0	1	0	0	1	0	0	0	0	0	1	0	4	1
0	0	10.5	1	0	0	0	0	0	0	0	0	1	1	1	0	0	0	0	2	1
0	0	9	1	0	0	#NULL!	0	#NULL!	#NULL!	#NULL!	#NULL!	#NULL!	1	1	0	0	1	0	1	0
0	1	5.25	1	0	0	1	0	0	0	0	0	1	1	0	1	0	0	0	2	0
0	0	7	1	0	0	1	0	0	0	0	0	1	1	1	1	0	1	0	4	0
0	1	2.33333	1	0	0	1	0	0	0	0	1	1	1	1	0	0	1	0	4	1
0	0	5	1	0	0	1	0	0	0	0	0	1	0	0	0	0	1	0	4	1
0	0	1.75	1	0	0	1	0	0	0	0	1	0	1	1	0	0	1	0	4	0
0	0	5	0	0	0	1	0	1	1	0	1	0	1	1	1	0	1	0	1	1
1	0	8	0	0	1	1	0	1	1	0	0	0	0	1	1	1	0	0	4	1
0	0	3.33333	0	0	0	1	0	0	1	0	0	0	1	0	1	0	0	0	4	0
0	0	7.5	1	0	1	0	0	0	0	0	0	1	1	1	1	0	1	0	2	0
0	0	7	1	0	0	1	0	0	0	1	0	1	1	1	0	0	1	0	4	0
0	1	4.66667	1	0	0	#NULL!	0	#NULL!	#NULL!	#NULL!	#NULL!	#NULL!	1	0	0	0	1	0	1	0
0	0	7.14286	0	0	1	0	0	1	1	0	0	0	1	1	0	0	1	0	2	1
0	0	11.6667	0	0	1	0	0	0	0	0	0	0	0	1	0	0	1	0	4	0
1	0	10.5	0	0	0	1	0	0	0	0	0	1	0	1	0	0	0	0	4	1
0	0	11.6667	0	0	1	0	0	0	1	0	1	0	0	1	0	0	1	0	4	1
1	0	5	0	0	0	1	1	0	0	0	0	0	0	1	0	0	1	0	4	1
0	0	8.75	0	0	0	1	0	0	0	0	1	0	1	1	1	1	1	0	2	1
0	0	4.375	1	0	0	0	0	0	0	0	1	0	1	0	0	0	1	0	4	1
0	0	6.66667	0	0	0	0	#NULL!	#NULL!	#NULL!	#NULL!	#NULL!	#NULL!	1	0	0	0	0	0	4	1
1	1	9.33333	0	1	0	1	0	1	1	1	0	0	0	1	1	0	1	0	4	0
0	0	9.58333	0	1	0	0	0	0	0	1	1	0	0	1	0	0	1	0	4	1
0	0	7.16667	0	1	0	0	0	0	1	0	0	1	1	1	0	1	1	0	1	1
0	0	5.25	0	1	1	1	0	0	0	0	1	0	1	1	0	0	1	0	4	0
0	0	5.15625	0	1	1	1	0	1	1	1	1	0	0	1	0	0	1	0	4	0
0	0	12	0	1	1	0	0	1	1	1	0	0	0	1	0	0	1	1	1	0
0	0	9.33333	1	1	0	0	0	0	0	0	1	0	0	1	0	0	1	0	4	1
0	0	14	1	1	0	0	0	0	0	0	0	0	1	1	0	0	1	0	2	0
0	0	7.1875	0	1	0	1	0	0	1	1	1	0	1	1	0	0	0	0	4	1
0	0	8.75	0	1	1	0	0	0	1	1	0	0	1	1	0	1	1	0	4	1
0	0	7.9375	0	1	0	0	0	1	1	0	0	1	0	1	0	0	1	1	4	1
1	1	5.83333	0	1	0	1	0	0	0	0	1	0	1	1	0	1	1	0	2	1
1	0	7.5	0	1	1	1	0	0	1	0	0	1	1	0	0	0	1	0	4	1
0	1	16.6667	1	1	1	0	0	0	1	0	1	0	1	0	1	1	1	0	2	1
1	0	3.5	1	1	1	0	0	0	1	0	1	0	0	1	0	0	1	0	4	1
1	0	3	1	1	1	0	0	0	1	0	0	0	1	1	0	1	1	0	4	1
0	0	6.5625	0	1	0	0	0	0	1	1	1	1	0	1	0	1	1	0	2	1
1	0	8.33333	1	1	0	1	0	0	0	0	1	1	0	1	0	1	1	0	4	1
0	0	6.25	0	1	0	0	0	0	0	0	0	0	0	1	0	1	0	0	4	1
1	0	10.5	0	1	1	0	0	1	1	1	0	0	0	1	0	1	1	0	1	1
0	1	12.5	0	1	1	1	#NULL!	#NULL!	#NULL!	#NULL!	#NULL!	#NULL!	0	1	1	1	1	1	2	1
1	0	8.75	0	1	0	0	0	0	0	0	0	0	1	0	0	0	1	0	2	1
1	0	7.09375	0	1	0	0	0	0	1	0	0	0	0	1	0	0	0	0	4	1
1	0	12.5	0	1	0	0	0	0	1	0	0	1	0	1	0	1	1	1	4	0
1	0	10.5556	0	1	0	1	0	1	1	0	0	0	0	1	0	0	1	0	4	0
0	0	7.5	0	1	1	0	0	1	1	0	0	1	0	1	1	0	1	1	4	1
0	0	22.25	0	1	0	0	0	0	1	0	0	1	0	1	0	1	0	0	1	1
0	0	3.84615	0	1	0	1	0	0	0	0	0	0	1	1	0	0	1	0	2	1
1	0	2.625	1	1	0	1	0	0	0	0	0	0	0	1	0	1	1	1	4	0
1	0	7.25	0	1	0	0	0	1	1	0	0	0	0	1	1	0	1	1	4	0
1	0	5.45	0	1	0	1	0	0	0	0	0	0	0	1	0	#NULL!	0	0	2	1
0	0	7	0	1	1	0	0	0	1	0	0	1	1	1	0	0	0	0	4	1
1	0	5.71429	0	1	0	1	0	0	0	0	1	1	1	1	0	1	1	0	2	1
1	0	40	0	1	0	0	0	0	1	0	0	1	1	1	0	1	1	0	2	1
0	0	2.625	0	1	0	1	0	0	0	0	0	0	1	1	0	0	1	0	2	1
1	0	4	0	1	0	1	0	0	1	0	0	0	1	0	0	0	1	0	2	1
0	0	3.57143	1	1	0	0	0	0	0	0	1	0	1	1	1	1	1	0	4	1
0	0	9.5	0	1	0	0	0	0	1	0	0	0	1	1	0	0	1	1	4	1
0	0	7.59375	0	1	0	0	0	0	1	0	0	0	0	1	0	0	1	1	4	0
0	0	5	1	1	0	1	0	0	0	0	0	1	1	0	0	0	1	0	4	0
0	0	12.5	1	1	1	1	0	0	0	0	0	0	0	1	0	0	1	0	4	1
0	0	1.875	1	1	0	0	0	0	0	0	0	0	0	0	0	1	1	0	1	1
1	0	6.92308	0	1	0	1	0	1	1	0	0	0	0	1	0	1	1	0	4	1
1	0	8.88889	0	1	0	0	0	0	0	0	0	0	0	1	0	1	1	0	2	1
1	0	7.42857	0	1	0	1	0	1	1	1	0	0	1	1	0	1	1	0	1	0
1	0	9.95	0	1	0	0	0	0	0	0	0	0	0	1	0	1	1	0	2	1
1	0	2.85714	0	1	0	1	0	0	0	0	0	1	1	0	0	0	1	0	3	1
1	0	16.25	1	1	0	1	0	0	1	0	0	0	1	1	0	1	1	0	2	1
1	0	12.5	0	1	0	0	0	1	1	0	0	0	0	1	0	0	1	0	2	1
0	0	15	0	1	0	0	0	0	1	0	1	0	0	1	0	0	0	1	4	1
1	0	7.55	0	1	0	0	0	1	1	1	0	0	0	1	0	0	1	0	4	1
0	0	6	0	1	0	0	0	1	1	0	0	1	1	1	0	0	1	0	4	1
0	0	10.3125	0	1	1	0	0	0	0	0	0	0	1	1	0	0	1	0	3	1
1	0	7.77778	0	1	1	1	0	0	0	0	0	1	1	0	0	0	0	0	4	1
0	0	7.08333	0	1	1	0	0	1	1	0	0	0	0	1	0	0	1	0	4	1
0	0	11.9167	0	1	1	0	0	1	1	1	0	0	0	1	0	1	1	0	1	1
1	0	5.0625	1	1	0	1	0	0	0	0	1	0	1	0	1	0	1	0	4	1
0	0	5	0	1	0	1	0	0	1	0	0	0	1	1	0	0	0	1	4	0
1	0	15	0	1	1	1	0	0	0	0	0	0	1	0	0	0	1	0	2	1
0	0	10	0	1	1	0	0	0	1	0	0	0	1	1	0	0	1	0	4	1
1	0	5	0	1	0	0	0	1	1	0	0	0	0	1	1	0	0	0	4	1
0	0	6.91667	0	1	1	0	0	0	1	0	0	0	0	1	1	0	1	1	4	1
0	0	3.88889	1	1	0	1	0	0	0	0	1	0	1	1	0	0	1	0	3	0
0	0	2.5	1	1	1	1	0	0	0	0	1	0	1	1	0	0	1	0	4	1
0	0	5.71429	1	1	0	0	0	0	0	0	0	1	1	0	0	0	1	0	1	1
0	0	10.3571	0	1	0	0	0	0	1	0	1	0	0	0	0	1	1	0	2	1
0	0	5	1	1	0	1	0	0	0	0	0	0	1	1	0	0	1	1	1	1
0	0	3.18182	1	1	0	1	0	0	1	0	0	0	0	1	0	1	0	0	4	1
0	0	10	1	1	0	0	0	0	0	0	1	0	1	1	1	0	1	1	4	0
0	0	8.75	0	1	0	0	0	0	1	0	0	0	1	1	0	1	0	0	4	1
0	0	10.25	0	1	1	0	0	1	1	0	1	0	1	1	1	0	1	1	4	1
1	0	5.125	0	1	0	1	0	0	0	0	0	0	0	1	0	1	0	1	2	1
0	0	5	1	1	0	1	0	0	0	0	0	0	1	1	1	1	1	0	4	1
0	0	5	1	1	0	1	0	0	0	0	1	0	1	1	0	0	1	0	4	1
0	0	10	1	1	0	1	0	0	1	0	1	0	0	1	0	0	1	0	4	0
0	0	13.3333	1	1	0	1	0	0	0	0	0	1	1	1	0	1	1	0	2	0
0	1	5	1	1	1	0	0	0	0	0	0	1	1	0	0	0	1	0	4	1
0	0	10.1667	0	1	1	0	0	0	1	0	1	1	0	1	1	0	0	0	4	0
0	0	6.25	0	1	0	0	0	0	1	0	1	0	1	1	0	1	1	0	1	1
0	0	8.54167	0	1	1	1	0	1	1	1	0	0	0	1	1	1	1	1	1	1
0	0	16.6667	0	1	1	0	0	0	0	0	0	0	0	1	0	1	1	0	1	1
0	1	13.5833	0	1	1	0	0	0	1	0	0	0	1	1	1	1	1	1	1	1
0	0	2.5	1	1	0	0	0	0	0	0	0	0	1	0	0	1	0	0	4	1
0	0	5.17857	0	1	0	1	0	0	1	0	0	0	0	1	1	0	0	1	3	1
0	1	5	0	1	0	1	0	0	0	0	0	0	1	1	1	0	0	0	4	1
1	0	12.5	1	1	0	1	0	0	0	0	0	1	1	1	1	1	0	1	1	1
0	0	5.82143	1	1	1	1	0	0	1	0	0	1	0	1	0	1	0	1	2	1
0	0	7.77778	1	1	0	1	0	0	0	0	0	1	0	1	0	0	0	0	2	1
0	0	8.33333	0	1	0	1	0	0	0	0	0	0	0	0	0	0	0	1	2	1
0	0	6.25	1	1	1	0	0	0	0	0	0	0	1	1	0	0	0	1	2	1
0	0	5.71429	0	0	0	1	0	0	1	0	1	0	0	1	1	0	0	1	3	1
0	0	3	1	0	0	0	0	1	0	0	0	0	1	1	0	0	0	0	4	1
0	0	1.66667	1	0	0	1	0	1	0	0	0	1	1	1	0	0	1	0	4	0
0	0	7.5	1	0	0	0	0	1	0	0	1	0	1	1	1	0	1	0	4	1
0	0	8.75	0	0	0	0	0	1	0	0	1	0	1	0	1	0	1	1	4	1
0	0	7	1	0	0	1	0	0	0	0	0	1	0	1	0	#NULL!	1	0	3	0
0	0	2.5	1	0	0	1	0	0	0	0	1	0	1	0	0	1	0	0	4	1
0	0	5.25	1	0	1	1	0	0	0	0	0	1	1	1	0	1	1	1	4	0
0	0	8.75	1	0	1	1	0	1	0	0	0	0	0	0	1	0	0	0	4	0
1	0	7	1	0	1	1	0	1	0	0	0	0	1	1	1	1	1	0	3	1
0	0	6.66667	1	0	0	1	0	0	0	0	0	0	1	1	0	0	0	0	4	0
0	0	3.5	1	0	0	1	0	1	0	0	0	0	1	1	0	0	1	1	3	0
0	0	8.75	0	0	1	1	#NULL!	#NULL!	#NULL!	#NULL!	#NULL!	#NULL!	1	1	0	0	1	0	4	0
0	0	2.33333	0	0	1	1	0	0	1	0	0	0	1	1	1	0	0	0	4	0
0	0	6.25	1	0	0	1	0	1	0	0	1	0	0	0	0	1	0	0	4	1
0	0	3.5	1	0	0	0	0	1	0	0	0	0	1	1	0	0	0	0	3	1
0	0	3.5	0	0	0	1	0	0	0	0	1	0	0	0	0	0	0	0	4	1
0	0	1.83333	1	0	1	1	0	1	0	0	0	1	1	1	0	0	0	0	4	1
0	0	8.33333	1	0	0	0	0	0	0	0	0	0	0	1	0	0	0	0	4	0
0	0	11.6667	1	0	0	1	0	1	0	0	0	0	1	1	0	0	1	0	4	0
0	0	2.85714	1	0	0	1	#NULL!	#NULL!	#NULL!	#NULL!	#NULL!	#NULL!	1	1	0	0	0	1	1	0
0	0	5	1	0	0	1	0	0	0	0	0	1	1	1	0	0	0	0	2	1
0	0	8.75	1	0	1	#NULL!	0	#NULL!	#NULL!	#NULL!	#NULL!	#NULL!	1	0	0	0	0	0	4	0
0	0	2.33333	1	0	0	#NULL!	0	#NULL!	#NULL!	#NULL!	#NULL!	#NULL!	0	0	0	#NULL!	1	0	3	1
0	0	5	1	0	1	0	0	0	0	0	0	1	1	0	0	1	1	0	2	0
0	0	7	0	0	0	0	0	0	0	0	0	0	0	1	0	0	1	0	4	0
0	0	5	1	0	0	1	0	0	0	0	1	0	0	1	1	0	0	0	4	0
0	0	5	0	0	1	0	0	0	0	0	0	1	0	1	0	0	0	0	4	#NULL!
0	0	5	1	0	0	0	0	0	0	0	1	0	1	0	0	0	1	0	4	1
0	0	6.25	1	0	0	1	0	0	0	0	1	0	1	1	0	0	0	0	4	1
0	0	4.375	1	0	1	1	0	0	1	0	0	0	1	0	0	1	0	0	4	1
0	0	8.75	1	0	0	1	0	0	0	0	0	0	1	1	0	0	0	0	4	1
1	0	4.2	0	0	0	1	0	0	0	0	0	0	0	1	0	0	1	0	2	1
0	0	10	0	0	0	1	0	1	0	0	0	0	0	1	1	0	1	0	4	0
0	0	4	1	0	0	1	0	1	1	0	1	0	0	1	0	1	1	0	4	1
0	0	11.6667	1	0	1	#NULL!	0	#NULL!	#NULL!	#NULL!	#NULL!	#NULL!	1	1	0	0	0	0	4	1
0	0	11.25	0	0	0	1	0	0	1	0	0	0	1	1	0	0	0	0	3	1
0	1	4.375	1	0	0	0	0	0	0	0	0	0	1	0	0	0	1	0	4	1
0	0	8.33333	0	0	1	0	0	0	0	0	0	0	1	1	0	1	1	0	3	0
0	0	10	0	0	0	0	0	0	0	0	0	0	0	1	0	0	0	0	2	1
0	0	3.15	1	0	0	0	0	1	0	0	0	0	1	1	0	0	1	0	2	1
0	0	6.66667	0	0	0	1	0	0	0	0	0	0	0	1	0	1	0	0	4	0
0	0	6	0	0	0	1	0	1	0	0	0	0	0	1	0	0	0	0	4	0
0	0	7	1	0	1	1	0	0	0	0	1	0	1	1	0	0	1	0	4	1
0	0	7.5	0	0	0	1	0	0	0	0	0	0	1	1	0	0	0	0	4	1
1	0	7.29167	0	0	0	1	0	0	1	0	0	0	0	1	0	0	1	1	2	1
1	0	7.5	0	0	1	0	0	0	0	0	1	0	0	1	0	0	1	0	4	1
0	0	5	1	0	0	1	#NULL!	#NULL!	#NULL!	#NULL!	#NULL!	#NULL!	1	1	0	1	1	0	3	1
1	0	5.97222	0	0	0	1	0	0	0	0	0	0	0	1	0	1	1	0	2	0
0	0	6.66667	0	0	0	0	0	1	1	0	0	0	1	1	0	1	1	0	2	1
0	0	2.5	1	0	1	1	0	0	0	0	0	1	1	0	0	0	1	1	4	0
1	0	3.125	1	0	0	1	0	0	0	0	0	1	0	1	0	1	0	0	2	1
1	0	2	0	0	1	1	0	1	0	0	0	0	1	1	0	1	1	0	1	1
0	0	11.6667	1	0	0	0	0	0	0	0	0	1	1	1	0	1	0	0	2	0
1	0	4.375	0	0	0	1	0	0	0	0	0	0	0	1	0	1	0	0	2	0
0	0	7.5	0	1	1	0	0	1	1	0	0	0	0	0	0	1	1	0	3	1
1	0	10.3125	0	1	1	1	0	0	0	0	0	0	1	1	0	0	1	0	2	0
0	0	5	0	1	0	1	0	0	1	0	0	0	0	1	0	1	1	0	4	0
1	0	5	1	1	0	1	0	1	0	0	0	0	0	1	0	0	1	1	4	1
1	0	11.9167	0	1	1	0	0	1	1	0	0	0	1	0	0	1	0	0	1	0
0	0	5.45527	0	1	0	1	0	1	1	1	0	0	0	0	0	1	1	0	2	1
0	0	8	0	1	0	1	0	1	1	0	0	0	1	1	0	1	0	0	4	0
0	0	3.21429	0	1	0	1	0	0	1	0	0	0	0	1	0	1	1	0	2	0
0	0	10.2857	0	1	0	1	0	1	1	0	0	0	0	1	0	0	0	0	4	0
0	0	5	1	1	1	1	0	0	0	0	0	0	1	0	0	1	0	0	4	0
0	0	5.83333	1	1	1	0	0	0	0	0	0	0	1	1	0	1	1	0	4	1
0	0	3.33333	1	1	0	1	0	0	0	0	0	1	1	1	0	0	1	0	4	1
1	0	8.75	1	1	0	1	0	0	0	0	0	1	1	1	1	0	1	0	4	1
0	0	#NULL!	1	1	1	1	0	0	0	0	0	1	1	0	0	0	1	0	4	1
1	0	13.125	0	1	0	1	0	1	1	0	0	0	0	1	0	1	1	0	4	1
1	0	4.82143	0	1	0	1	0	1	1	0	0	0	0	1	1	0	1	1	4	1
0	1	14.0833	0	1	1	1	0	1	1	1	0	0	1	1	0	0	0	0	1	1
0	1	0.625	0	1	1	1	0	1	1	0	0	0	0	1	1	1	0	0	4	1
0	1	16.6667	0	1	0	0	0	1	1	0	0	0	1	0	0	0	0	0	2	1
0	0	4.6875	0	1	0	1	0	0	1	0	0	0	1	1	0	0	1	0	4	0
1	0	12.5625	0	1	1	0	0	0	1	0	0	0	0	1	0	0	1	0	4	1
0	0	5	0	1	0	1	0	1	1	0	0	1	0	0	0	1	1	0	2	1
0	0	6.33333	0	1	0	1	0	1	1	0	0	0	0	1	0	0	1	0	4	1
0	0	8.33333	1	1	0	1	0	0	0	0	0	1	0	0	0	0	1	0	4	1
0	0	10.25	0	1	0	0	0	1	1	1	0	0	1	1	0	0	1	0	4	1
1	1	6	1	1	0	0	0	0	0	0	1	1	1	1	0	0	0	0	4	1
0	0	3.33333	0	1	0	1	0	0	0	0	0	1	1	1	0	0	1	0	4	1
0	0	5.6	0	1	1	0	0	0	0	0	1	1	0	1	0	0	1	0	2	1
0	0	9.45833	0	1	0	0	0	0	0	0	1	1	1	1	0	1	1	0	4	1
1	0	3.75	1	1	0	1	0	0	0	0	0	1	0	1	0	0	1	0	2	1
1	0	4.75	0	1	0	1	0	0	0	0	0	1	1	1	1	0	1	1	2	1
0	0	9.33333	0	1	0	0	0	0	0	0	0	1	0	1	0	0	1	0	1	1
0	0	9.375	0	1	0	1	1	1	1	1	0	0	0	1	0	0	1	1	1	1
1	0	13.5	0	1	1	1	0	1	1	0	0	0	0	1	1	1	1	1	1	1
0	0	5.79545	0	1	0	1	0	1	1	0	0	0	1	1	0	0	1	1	4	1
1	0	5.5	0	1	0	1	0	0	1	0	0	1	1	1	0	1	1	0	4	1
0	0	7.5	1	1	0	1	0	0	0	0	0	0	0	1	0	0	0	0	1	1
1	0	4.6	0	1	0	0	0	0	1	0	0	0	0	1	0	1	1	0	4	1
0	0	4.28571	0	1	0	1	0	0	1	0	0	0	1	1	0	0	1	0	2	0
0	1	4	1	1	0	1	0	0	0	0	0	1	1	1	0	0	0	0	4	1
0	0	5.6	0	1	0	0	0	0	0	0	0	0	1	1	1	1	1	0	1	1
1	0	4.175	0	1	0	1	0	1	1	0	0	0	0	1	0	0	1	0	2	1
1	0	2.33333	1	1	0	1	0	0	0	0	1	0	1	1	1	0	0	1	4	1
1	0	1.5	0	1	0	1	0	0	1	0	1	0	1	0	0	0	1	0	4	0
0	0	10	0	1	0	1	0	1	1	1	0	0	0	1	1	0	1	1	2	1
1	0	3.5	0	1	0	1	0	0	0	0	0	1	1	1	0	0	1	0	4	1
0	0	5.33333	0	1	0	1	0	0	0	0	0	0	1	1	0	0	0	0	4	1
0	0	7.14286	1	1	1	1	0	0	0	0	0	1	1	1	0	0	1	0	4	1
1	1	7	0	1	0	0	0	0	0	0	0	1	0	1	0	#NULL!	1	1	4	1
0	1	11.875	0	1	1	1	#NULL!	#NULL!	#NULL!	#NULL!	#NULL!	#NULL!	0	1	1	0	1	1	4	1
1	1	12.9167	0	1	0	0	0	0	1	0	0	0	0	1	0	#NULL!	0	0	4	0
0	0	12.5	1	1	0	1	0	0	0	0	0	0	1	0	0	1	1	0	4	1
0	0	0.6	1	1	1	0	0	0	0	0	0	0	1	0	0	0	0	0	4	1
0	0	0.00666667	1	1	0	1	0	0	0	0	0	1	0	1	0	0	1	0	4	0
0	0	0.625	0	1	0	1	0	0	0	0	0	0	1	0	0	0	1	0	2	1
0	0	7	0	1	0	0	0	0	1	0	1	1	0	0	1	0	1	0	4	0
0	1	7.5	0	1	1	0	0	0	0	0	0	0	1	1	0	0	1	0	2	1
0	0	7.14286	0	1	1	1	0	0	1	0	0	1	0	1	0	0	1	0	4	1
0	1	10	0	1	0	1	0	0	1	0	1	0	1	0	0	0	0	0	4	1
0	0	7	1	1	1	1	1	0	0	0	0	0	1	1	0	0	0	0	1	1
0	0	7	1	1	1	1	0	0	0	0	0	0	1	1	0	1	1	0	1	1
0	0	6.66667	0	1	0	0	1	0	1	0	1	1	1	1	0	0	0	0	4	1
1	1	7	1	1	0	0	0	0	0	0	0	0	1	1	0	0	1	0	2	1
0	1	3	1	1	0	1	1	0	0	0	0	1	1	1	1	0	0	0	2	0
0	0	8.75	0	1	1	0	0	0	0	0	0	0	0	1	0	1	1	0	1	1
1	1	2.8	1	1	0	1	0	0	0	0	0	1	1	0	0	0	1	0	4	1
0	0	3.33333	0	1	1	#NULL!	0	#NULL!	#NULL!	#NULL!	#NULL!	#NULL!	1	0	0	0	1	0	1	1
0	0	3	0	1	1	0	0	0	0	0	1	0	1	1	0	0	1	0	2	1
0	0	5.25	0	1	0	0	0	0	1	0	0	1	0	1	0	1	1	0	4	1
1	0	8.75	0	1	0	0	0	0	0	0	0	0	1	1	0	0	0	1	2	1
0	0	4.16667	0	1	1	0	0	0	1	0	0	1	0	0	0	0	1	0	2	1
0	0	6.25	0	1	0	1	0	1	1	0	0	1	1	1	0	0	1	0	2	1
1	0	10	0	1	0	1	1	1	1	0	1	0	0	1	1	1	1	1	1	1
0	1	5	0	1	1	0	0	0	1	0	0	1	0	1	1	0	1	0	4	1
0	0	10.6667	0	1	0	1	0	0	1	0	0	0	0	1	0	0	1	1	2	1
1	0	7.14286	0	1	0	1	0	1	1	0	0	0	0	1	1	1	1	0	4	1
1	0	6.66667	0	1	0	1	1	0	1	0	1	0	0	1	0	0	1	1	2	1
0	0	11.6667	1	1	0	0	1	0	0	0	0	1	1	1	0	0	1	0	4	1
0	0	5	1	1	1	1	1	0	0	0	0	1	0	0	0	0	1	1	4	1
0	0	4.66667	0	1	1	1	0	0	1	0	0	0	0	0	0	0	1	1	4	1
0	0	10	1	1	1	1	0	0	1	0	0	1	1	0	1	1	1	0	1	1
1	0	10	1	1	0	1	0	0	0	0	0	1	0	1	0	1	1	0	1	1
0	0	14.45	0	1	0	1	0	1	0	0	0	1	1	1	1	0	1	0	1	1
0	0	8.4	1	1	0	0	1	0	0	0	1	1	1	1	0	1	1	0	2	1
0	0	5.625	1	1	1	1	0	1	0	0	1	0	1	0	1	0	1	0	2	1
0	0	6.36364	1	1	1	1	0	0	0	0	1	0	1	0	0	0	0	0	4	1
0	1	9.33333	1	1	1	0	0	0	0	0	0	0	1	1	0	0	0	0	2	1
0	0	8.75	0	1	0	0	0	1	1	0	0	0	0	1	0	1	1	1	1	1
0	0	5	0	1	0	0	0	0	0	0	0	0	1	1	0	0	0	0	4	1
0	0	5.33333	0	1	0	0	0	0	0	0	1	0	0	1	0	0	0	0	4	1
0	0	4.45455	0	1	0	0	0	0	0	0	0	0	1	0	0	0	0	0	1	1
0	0	11.6667	1	1	0	0	0	0	0	0	1	1	1	0	0	0	1	1	2	1
1	0	#NULL!	1	1	0	1	0	0	0	0	0	0	1	1	0	0	0	0	4	1
0	0	4.2	0	1	0	0	0	1	1	0	1	0	0	1	0	0	1	1	2	1
1	0	7	1	1	0	0	0	0	0	0	0	0	1	0	0	0	0	0	4	0
0	0	8.75	1	1	0	1	0	0	0	0	1	1	0	1	0	0	1	1	1	1
0	0	25	1	1	0	1	0	0	0	0	1	0	0	1	0	0	0	0	2	1
0	0	1	1	1	1	1	1	0	0	0	0	1	0	1	0	0	1	0	4	1
0	0	0.833333	0	1	1	1	0	0	1	0	0	0	1	0	0	0	0	0	3	1
0	0	9.33333	0	1	0	1	1	0	0	0	0	1	0	1	0	0	1	0	2	1
0	0	3.33333	1	1	1	1	0	0	0	0	1	1	1	1	0	0	1	0	2	1
1	0	5	1	1	1	1	0	0	0	0	0	0	1	1	0	#NULL!	0	0	2	1
0	0	7.5	1	1	0	1	0	0	0	0	0	0	1	0	0	0	0	0	3	0
0	0	2.85714	1	0	0	1	0	1	0	0	1	0	0	1	0	0	1	0	4	1
0	0	8	1	0	0	1	1	1	1	0	0	0	1	1	0	0	0	0	2	0
1	0	8.75	0	0	0	1	0	0	1	0	1	0	1	1	0	0	1	0	4	1
0	0	4.375	0	0	0	1	0	0	0	0	1	1	0	1	0	0	1	0	4	0
0	0	4.66667	1	0	0	1	0	0	0	0	0	0	1	0	0	0	0	0	2	0
0	0	7.5	1	0	0	0	0	0	0	0	0	1	1	1	0	0	0	0	1	1
0	0	5	1	0	0	0	0	0	0	0	0	0	1	1	0	0	0	0	3	1
0	0	7	1	0	0	0	0	0	1	0	0	0	1	0	0	0	1	1	3	0
1	0	6.66667	1	0	0	0	0	0	1	0	0	0	1	0	0	0	0	0	3	1
0	0	10	1	0	0	1	0	1	0	0	0	0	0	1	0	0	0	0	4	1
0	0	4	1	0	0	1	0	0	0	0	1	0	0	0	0	0	0	0	3	1
0	1	8.75	1	0	0	1	1	0	0	0	0	1	1	0	0	0	1	0	2	1
1	0	3	1	0	0	1	0	0	0	0	0	0	1	1	0	#NULL!	0	0	2	0
0	0	2.4	1	0	0	1	0	0	1	0	0	0	0	0	0	0	0	0	4	0
0	0	7	1	0	1	1	0	0	0	0	0	0	1	0	0	0	1	0	2	1
0	0	0.714286	1	0	0	1	0	1	0	0	0	0	0	1	0	#NULL!	0	0	3	1
0	0	7	1	0	0	1	0	1	0	0	0	0	1	0	0	0	0	0	4	1
0	0	14	1	0	1	1	0	1	0	0	0	0	0	1	0	0	1	0	3	1
0	0	11.6667	1	0	0	1	0	1	0	0	0	0	1	1	0	0	0	0	2	1
0	1	4.2	1	0	1	1	0	0	0	0	0	0	1	0	0	1	0	0	2	1
0	0	11.6667	1	0	0	0	1	0	0	0	1	1	1	0	0	0	1	0	4	0
1	0	5	1	0	0	1	1	1	0	0	0	0	0	0	0	0	0	0	2	0
1	0	9.8	0	0	0	1	0	1	0	0	1	0	0	1	0	0	1	1	2	1
0	0	4.66667	1	0	0	1	0	0	0	0	1	0	1	1	0	0	0	0	2	1
0	0	7	1	0	0	0	1	0	0	0	0	0	1	1	0	0	1	0	1	1
0	0	5.6	1	0	0	1	0	0	0	0	0	1	1	1	0	#NULL!	0	0	2	1
1	0	8.75	0	0	0	1	0	0	0	0	0	1	1	1	0	0	1	0	4	0
0	0	5.83333	1	0	1	1	0	1	0	0	0	0	1	1	0	1	0	0	2	0
1	0	11.6667	1	0	0	1	1	0	0	0	0	0	0	1	0	0	1	0	4	1
0	0	5	1	0	1	1	0	1	0	0	1	0	1	1	0	0	0	0	4	0
0	0	4.66667	1	0	0	0	#NULL!	#NULL!	#NULL!	#NULL!	#NULL!	#NULL!	0	0	0	0	0	0	4	1
0	0	7	1	0	0	1	0	1	0	0	0	0	1	1	0	0	1	0	4	0
0	0	9.58333	0	0	1	1	1	0	0	0	0	1	1	0	0	0	1	0	2	1
0	0	5.25	1	0	0	1	0	1	0	0	1	0	1	1	0	0	0	0	2	1
0	0	3	1	0	0	1	0	0	0	0	1	0	1	1	0	0	0	0	4	0
0	0	5.25	0	0	0	1	0	0	1	0	1	0	0	1	0	0	0	0	2	0
1	0	5.83333	0	0	1	1	0	0	0	0	0	0	0	1	0	0	1	0	2	0
1	0	10	0	0	0	1	0	0	1	0	0	0	0	1	0	0	1	0	4	1
0	0	8.75	1	0	1	0	0	0	1	0	0	0	1	1	0	0	0	0	1	1
0	0	6.60714	0	0	1	1	0	1	1	1	0	0	0	1	0	0	1	0	1	1
0	0	4.2	1	0	0	1	0	0	0	0	0	0	1	1	0	#NULL!	0	0	4	1
1	0	8.5	0	0	0	1	0	1	0	0	0	0	1	1	0	1	1	1	1	1
0	0	8.75	0	0	0	1	0	0	1	0	0	0	1	1	0	0	1	1	4	1
0	0	10.5	0	0	0	0	0	1	1	1	0	0	1	0	0	0	1	1	3	1
0	0	5.6	1	0	0	0	0	0	0	0	1	0	1	0	0	#NULL!	1	0	1	1
0	0	4.2	1	0	0	#NULL!	0	#NULL!	#NULL!	#NULL!	#NULL!	#NULL!	1	0	0	#NULL!	1	0	1	0
0	0	7.14286	1	0	1	1	0	0	0	0	0	1	0	0	0	0	1	0	2	0
0	0	8.4	1	0	0	0	0	1	1	0	0	1	1	1	0	0	0	0	3	1
1	0	8.33333	1	0	0	1	0	1	0	0	0	0	0	1	0	0	1	1	2	1
0	0	6	0	0	0	0	0	0	1	0	0	0	1	1	0	1	0	0	2	1
1	0	7	1	0	0	1	0	0	0	0	1	1	1	1	0	#NULL!	0	1	2	1
0	1	5.6	1	0	0	1	#NULL!	#NULL!	#NULL!	#NULL!	#NULL!	#NULL!	0	1	0	0	0	0	4	1
1	0	0.714286	0	0	0	1	1	0	1	0	1	0	0	1	0	0	1	0	4	1
0	0	11.0833	0	0	0	1	0	0	1	0	0	0	0	1	0	0	0	0	1	1
1	0	8.75	1	0	0	0	#NULL!	#NULL!	#NULL!	#NULL!	#NULL!	#NULL!	0	1	0	0	1	0	2	1
0	0	7	0	0	0	1	0	0	1	0	0	0	0	1	0	0	1	0	2	1
0	0	4.2	1	0	0	1	1	0	0	0	0	0	0	1	0	0	1	1	4	0
1	0	10.5	0	0	0	1	0	0	0	0	0	0	0	1	0	0	0	0	4	1
1	0	7	1	0	0	0	#NULL!	#NULL!	#NULL!	#NULL!	0	#NULL!	0	1	0	1	1	1	1	1
1	0	5	1	0	0	1	0	0	1	0	0	0	1	1	0	0	0	0	4	0
0	0	10.3333	0	0	0	1	0	1	0	0	0	0	0	0	0	1	0	0	2	1
1	0	5	1	0	0	1	0	0	0	0	1	0	0	1	0	0	1	0	2	0
1	0	4.2	1	0	0	1	0	0	0	0	0	0	0	1	0	1	0	0	2	1
0	0	16.6667	0	0	0	1	0	0	0	0	1	1	1	1	0	0	1	0	4	0
0	0	7.67857	0	1	0	1	0	1	1	0	1	0	0	0	0	0	1	0	4	0
0	0	11.6667	0	1	0	0	0	0	1	1	0	0	1	1	0	1	0	0	2	1
0	0	12.5	0	1	1	0	1	0	1	1	1	0	1	1	0	0	1	1	2	1
1	0	10.0833	0	1	0	1	0	0	0	0	0	0	0	1	0	1	0	0	1	0
0	0	5.4375	0	1	0	1	0	0	0	0	0	0	0	1	0	0	1	0	1	0
0	0	11.875	0	1	0	1	0	1	0	0	0	0	0	1	0	1	0	0	1	0
0	0	6.25	0	1	0	0	0	0	1	0	0	0	1	0	0	0	1	0	2	0
0	1	7	1	1	1	0	0	0	0	0	1	1	1	1	0	0	1	0	1	0
0	0	5.71429	0	1	0	1	0	0	1	0	0	1	0	0	0	0	1	0	2	1
0	0	6.66667	0	1	0	0	0	0	0	0	0	0	0	1	0	0	1	0	4	0
0	0	5.25	0	1	0	0	0	0	1	0	0	0	0	1	0	1	0	0	2	0
0	0	1.05	0	1	0	1	0	0	1	0	1	0	0	1	0	0	0	0	4	1
0	0	#NULL!	0	1	0	0	0	0	1	0	0	0	1	1	0	0	0	0	4	1
0	0	13.1667	0	1	0	1	0	1	1	0	0	0	0	1	0	0	1	1	4	0
1	0	2.5	1	1	0	0	0	0	0	0	0	0	1	1	0	0	1	0	4	1
1	0	7	0	1	0	0	0	0	1	0	0	0	1	1	0	0	1	0	1	1
1	0	#NULL!	0	1	0	0	0	0	0	0	0	0	0	1	0	0	0	0	4	1
0	0	5	1	1	0	1	0	0	0	0	1	0	1	0	0	1	0	0	4	1
1	0	3.33333	0	1	0	#NULL!	0	0	1	0	0	1	1	1	0	#NULL!	0	0	4	1
0	0	#NULL!	0	1	0	1	0	0	1	0	0	0	1	1	1	0	0	0	4	1
1	0	#NULL!	0	1	1	0	0	0	0	0	1	0	0	1	0	0	0	0	4	1
1	0	8.75	0	1	0	0	0	1	0	0	0	0	0	1	0	0	0	0	4	1
0	1	5	0	1	0	0	0	0	0	0	0	0	1	1	0	#NULL!	1	1	4	1
0	0	2.8	1	1	0	0	0	0	0	0	0	0	1	1	0	0	0	0	3	1
0	0	4.9	1	1	0	0	0	0	0	0	0	1	1	0	0	1	0	0	4	1
1	0	2.72727	1	1	0	1	0	0	0	0	0	0	1	0	0	0	1	0	4	1
0	1	5.83333	1	1	0	0	0	1	0	0	0	0	0	0	0	0	0	0	2	1
0	0	9.58333	0	1	0	0	0	0	0	0	0	0	1	1	0	1	0	0	2	1
0	0	3	1	1	0	0	0	0	0	0	0	0	1	1	0	#NULL!	0	0	2	1
1	1	7.625	0	1	0	0	0	1	1	0	0	0	1	1	0	0	1	1	4	1
0	0	11.9167	0	1	1	0	0	1	1	0	0	0	0	1	0	0	1	1	4	1
0	0	#NULL!	0	1	0	0	0	1	1	0	0	0	0	1	1	0	0	0	4	0
0	1	2.5	0	1	0	0	0	0	0	0	1	0	1	0	0	0	0	0	4	1
1	0	8.88889	0	1	1	1	0	1	1	0	0	0	1	1	1	1	0	0	3	1
0	0	13.75	0	1	0	0	0	1	1	0	0	0	0	1	0	1	0	1	4	1
0	0	10	1	1	0	1	0	0	0	0	0	0	0	1	0	1	0	1	3	0
1	0	11.6667	0	1	0	1	0	0	0	0	0	1	0	1	0	0	0	0	4	1
0	0	12.0833	0	1	0	0	0	1	1	0	0	0	0	1	0	0	1	0	4	1
1	1	10.25	0	1	0	0	0	1	0	0	0	0	1	0	0	1	1	0	3	1
1	0	0.7	0	1	0	0	0	1	1	1	0	0	0	0	0	0	1	0	3	1
1	0	13	0	1	0	1	0	1	1	0	0	0	1	1	0	0	1	0	4	1
1	1	11.6667	0	1	0	0	0	0	1	0	0	0	1	1	0	1	1	0	4	0
1	0	10	0	1	0	0	0	0	0	0	0	0	0	1	0	0	1	1	2	1
1	0	2	0	1	1	1	0	0	0	0	0	0	1	1	0	0	0	0	2	1
0	1	7	1	1	1	0	#NULL!	#NULL!	#NULL!	#NULL!	#NULL!	#NULL!	0	0	0	1	1	0	2	1
0	0	1.42857	1	1	1	1	0	1	0	0	1	0	1	1	0	0	1	0	4	1
1	1	3.11111	0	1	0	1	0	0	0	0	0	0	0	0	0	0	0	0	3	1
0	0	7	1	1	0	1	0	1	0	0	0	0	0	1	0	0	0	0	1	0
1	1	8.75	1	1	0	1	0	0	0	0	0	0	0	0	0	0	1	0	1	1
1	1	1	0	1	0	1	0	1	1	1	0	0	0	1	0	0	0	0	4	1
1	1	11	0	1	0	0	0	0	1	0	1	0	1	1	0	0	1	0	3	1
0	0	#NULL!	1	1	1	0	0	0	0	0	0	0	1	1	0	0	0	0	4	1
0	0	8.75	0	1	0	0	0	0	0	0	0	0	1	1	0	0	1	0	4	1
0	0	6.75	1	1	1	1	0	1	0	0	0	0	1	1	0	0	1	0	4	1
0	1	2.8	1	1	0	0	0	0	0	0	0	0	1	0	0	0	0	0	3	1
#NULL!	0	5.25	1	1	0	1	0	0	0	0	0	0	1	#NULL!	0	1	0	0	4	1
1	1	11.6875	1	1	0	0	0	0	0	0	0	0	1	0	0	1	0	0	1	1
0	0	3	1	1	0	1	0	0	0	0	0	0	0	1	0	0	0	0	2	0
0	0	4.29167	0	1	0	1	0	1	1	0	0	0	0	1	0	0	1	0	4	0
0	0	6	1	1	0	1	0	0	0	0	0	0	1	0	0	0	0	0	2	1
0	0	10	1	1	0	0	0	0	0	0	0	0	1	1	0	0	1	0	4	1
0	0	4.2	1	1	0	1	0	0	0	0	0	0	1	1	0	1	0	0	2	1
0	0	3.5	0	1	0	1	0	1	0	0	1	0	1	1	0	0	0	0	2	1
0	0	9.33333	0	1	0	0	0	0	1	0	1	0	1	1	0	0	0	0	1	1
0	0	6	1	1	0	1	0	0	0	0	0	0	1	0	0	0	1	0	4	1
0	0	3.33333	0	1	0	1	0	0	0	0	0	0	0	1	0	0	1	0	1	0
0	0	1.42857	1	1	0	1	0	0	0	0	0	0	1	1	0	0	0	0	2	0
0	0	12.5	0	1	0	1	0	1	1	1	1	0	1	1	0	0	1	1	4	0
0	0	5.25	0	1	0	0	0	0	0	0	0	0	1	0	0	0	0	0	1	1
0	0	5.25	1	1	0	0	0	0	0	0	0	0	1	1	0	0	1	0	4	1
0	0	2.625	0	1	0	1	0	0	0	0	0	0	1	0	0	1	0	0	1	0
0	0	4.16667	0	1	1	1	0	0	0	0	0	0	0	0	0	1	1	0	2	1
0	0	9.5	1	1	1	0	0	0	0	0	0	0	1	1	0	0	1	0	4	1
0	0	6.66667	1	1	1	0	0	0	0	0	0	0	1	1	0	0	0	0	4	1
0	0	8.75	0	1	0	1	0	0	0	0	0	0	0	1	0	1	1	0	1	1
0	0	5	1	1	0	1	0	0	0	0	0	0	1	1	0	0	0	0	2	1
0	0	10	0	1	0	1	0	0	0	0	1	0	0	0	0	0	1	0	4	0
1	0	3	1	1	0	1	0	0	0	0	0	0	1	1	0	0	0	0	4	1
1	0	9	0	1	1	1	0	0	1	0	0	0	0	1	0	0	1	0	1	1
0	0	11.6667	0	1	0	0	0	0	1	0	0	1	0	1	0	1	1	0	1	1
0	0	8.75	0	1	0	0	0	0	0	0	0	1	1	1	0	0	1	0	2	1
0	1	3.88889	1	1	0	1	0	0	0	0	0	1	1	1	0	0	1	0	1	1
0	0	12.3333	0	1	0	0	0	1	1	0	0	0	0	1	0	0	1	0	4	0
0	0	3.88889	1	1	0	1	0	0	0	0	1	0	1	1	1	0	1	0	4	1
0	0	3.86364	0	1	0	1	0	1	1	0	0	0	0	1	0	0	1	0	4	1
0	0	8	0	1	0	0	0	1	1	0	0	0	0	1	0	0	1	0	2	0
0	0	2.77778	1	1	0	1	0	0	0	0	0	0	0	1	0	0	0	0	4	0
0	0	5	1	1	1	#NULL!	0	#NULL!	#NULL!	#NULL!	#NULL!	#NULL!	1	0	0	0	1	0	4	0
0	0	8.75	1	1	1	1	0	0	0	0	0	1	1	0	0	1	1	0	1	1
0	0	6.42857	1	1	0	1	0	0	0	0	0	1	1	1	0	0	0	0	4	1
0	0	5	1	1	1	#NULL!	1	#NULL!	#NULL!	#NULL!	#NULL!	#NULL!	1	0	0	0	1	0	4	1
0	0	6.25	0	1	1	1	0	0	0	0	1	1	0	1	0	1	1	0	4	1
0	0	8.75	1	1	1	0	0	0	0	0	0	0	0	0	0	0	1	0	1	1
0	0	10	0	1	1	0	0	0	1	0	0	1	0	1	0	0	1	0	1	0
0	1	11.6667	1	1	0	0	0	0	0	0	0	0	0	1	0	1	1	0	4	0
0	0	4.375	1	0	1	1	0	0	0	0	0	1	0	1	0	0	1	0	4	0
1	0	5	1	0	0	1	0	0	0	0	0	0	1	1	0	0	0	0	2	1
0	0	10.6667	1	0	0	0	0	0	0	0	0	0	0	1	0	0	1	0	2	1
0	0	11.6667	1	0	0	0	0	0	0	0	1	1	0	0	0	1	1	0	4	0
0	0	5.66667	1	0	1	1	0	0	0	0	0	0	1	1	0	0	0	0	4	0
1	0	5.83333	0	0	0	1	0	1	0	0	1	1	1	0	0	0	1	0	4	0
0	1	4.375	1	0	1	1	0	0	0	0	0	0	1	0	0	0	1	0	4	1
0	0	7	1	0	1	1	0	0	0	0	0	0	1	0	0	0	0	0	2	0
0	1	6.66667	0	0	0	1	0	0	0	0	0	1	1	1	0	0	1	0	4	1
0	0	3.07692	1	0	0	1	0	0	0	0	1	0	1	1	0	0	0	0	1	0
0	0	8.75	1	0	0	1	0	0	0	0	0	1	1	1	0	0	1	0	2	1
0	0	5	1	0	0	0	0	0	0	0	0	0	0	0	0	0	0	0	2	1
0	0	7	1	0	0	0	0	0	0	0	1	1	1	1	0	0	1	0	1	1
1	0	7.5	1	0	0	1	0	0	0	0	0	0	0	0	0	0	0	0	4	1
0	0	5.25	1	0	0	0	0	1	0	0	0	1	1	0	0	0	1	0	4	1
0	0	5	0	0	0	0	0	1	0	0	0	1	1	1	0	0	1	0	4	0
0	0	8.33333	1	0	0	1	0	0	0	0	1	0	0	1	0	0	0	0	4	0
0	0	7	1	0	0	0	0	0	0	0	0	0	1	0	0	0	1	0	3	1
0	1	3	1	0	1	1	0	0	0	0	0	1	1	1	0	0	1	0	4	0
0	0	4.2	1	0	0	1	0	1	0	0	0	0	0	1	0	0	1	0	2	1
0	0	7	1	0	1	1	0	1	0	0	0	0	1	0	0	0	1	0	2	0
0	0	4.375	0	0	1	1	0	1	1	0	1	1	0	1	0	0	0	0	4	1
0	0	9.33333	0	0	0	1	0	0	0	0	0	1	0	0	0	0	1	0	1	1
0	0	5	0	0	0	1	0	0	0	0	0	0	1	1	0	0	1	0	2	0
0	0	5	1	0	0	0	0	1	0	0	0	1	1	0	0	0	1	0	1	1
0	0	6.25	1	0	0	0	0	1	0	0	0	0	1	1	0	0	1	0	4	0
0	0	5	1	0	0	1	0	0	0	0	0	0	1	1	0	1	1	0	4	1
0	0	3.5	1	0	0	0	0	1	0	0	1	0	0	0	0	0	1	0	4	1
0	0	7	1	0	1	1	0	0	0	0	0	0	0	1	0	0	1	0	1	1
0	0	7	1	0	1	1	0	0	0	0	0	0	1	1	0	0	1	0	4	1
0	0	3.5	1	0	0	1	0	0	0	0	0	0	1	0	0	0	0	0	2	1
0	0	7	1	0	1	1	0	0	0	0	0	1	0	0	0	0	0	0	2	0
0	0	7	1	0	0	0	0	0	0	0	0	1	1	0	0	1	1	0	1	1
1	1	5.25	1	0	1	0	0	0	0	0	0	0	1	0	0	0	0	0	4	1
0	0	6.25	1	0	0	0	0	0	0	0	0	1	1	1	0	0	1	0	4	1
0	0	2.85714	1	0	0	#NULL!	0	#NULL!	#NULL!	#NULL!	#NULL!	#NULL!	1	0	0	0	1	0	2	1
0	1	5.33333	1	0	0	#NULL!	0	#NULL!	#NULL!	#NULL!	#NULL!	#NULL!	1	0	0	0	1	0	4	0
0	0	5.83333	1	0	1	1	0	0	0	0	0	1	0	0	0	0	1	0	4	0
0	1	7	1	0	1	1	0	0	0	0	0	0	1	0	0	0	1	0	2	1
1	0	7	0	0	0	0	0	0	0	0	0	0	1	1	0	0	1	0	2	1
0	0	11.6667	1	0	1	0	0	0	0	0	0	0	1	1	0	1	1	0	1	1
0	0	5.83333	0	0	1	0	0	0	0	0	0	0	1	1	0	0	1	0	2	1
0	1	6.78571	0	0	0	1	0	0	1	1	0	1	0	1	0	0	1	0	4	1
0	0	5.625	0	0	0	0	0	0	0	0	0	0	1	1	0	0	1	0	2	1
1	1	5	0	0	0	1	0	1	0	0	0	0	0	1	0	0	1	0	2	1
1	0	6.66667	0	0	0	1	0	1	1	0	0	1	1	1	0	0	1	0	1	1
0	0	6	0	0	1	1	0	1	1	0	0	0	1	1	0	0	0	0	1	1
0	0	7	1	0	0	1	0	0	0	0	0	1	1	1	0	0	1	0	3	0
0	0	8	0	0	0	0	0	0	0	0	0	0	0	1	0	0	1	0	1	1
0	0	6.66667	0	0	0	0	0	0	0	0	1	0	1	1	0	0	1	0	4	1
0	1	5	1	0	0	0	0	0	0	0	1	1	1	0	0	1	1	0	2	1
0	0	10	1	0	1	0	0	0	0	0	0	1	1	1	0	0	0	0	4	0
0	0	7	1	0	0	0	0	0	0	0	0	1	1	1	0	0	1	0	3	0
0	0	7	1	0	1	1	0	0	0	0	1	0	0	1	0	0	0	0	1	1
1	0	5	0	0	0	1	0	0	0	0	0	0	1	0	0	0	0	0	2	1
0	0	8.4	1	0	0	1	0	0	0	0	0	0	1	1	0	#NULL!	0	0	4	1
1	1	6.0005	0	0	1	0	0	0	1	0	0	1	0	1	1	0	1	0	1	1
0	1	20	0	0	0	0	0	1	1	0	0	0	1	1	0	0	0	0	4	1
0	0	5.16667	1	0	0	0	0	1	1	0	0	0	0	1	0	0	1	0	4	1
0	0	2.9375	0	0	0	1	0	0	1	0	0	1	0	1	0	0	1	0	1	1
0	0	2.91667	0	0	0	1	0	1	1	0	1	1	1	1	0	1	1	1	4	0
1	0	3.18182	1	0	1	1	0	0	0	0	1	0	1	1	0	0	1	0	4	0
0	0	8.75	1	0	1	0	0	0	1	0	1	1	1	0	0	0	1	0	4	1
0	0	7.5	1	0	0	1	0	0	0	0	1	0	1	1	0	1	1	0	2	0
1	0	3.5	1	0	0	1	0	1	0	0	1	0	0	1	0	0	1	0	2	1
0	0	7.5	0	0	0	1	0	1	0	0	0	1	1	1	0	0	1	0	1	0
0	0	3.5	1	0	0	1	0	1	0	0	1	1	1	1	0	1	1	0	3	1
0	0	5	0	0	0	1	0	0	1	0	1	0	1	1	0	#NULL!	0	0		#NULL!
0	0	5.83333	0	1	0	0	0	0	0	0	1	1	0	1	0	0	1	0	3	1
0	0	7	1	1	0	1	0	0	0	0	1	1	0	1	0	0	1	0	4	1
0	0	10	0	1	0	0	0	0	0	0	1	1	1	1	0	0	1	0	1	1
0	0	5	1	1	0	1	0	0	0	0	0	0	1	0	0	0	0	0	4	0
0	0	5	0	1	0	1	0	0	1	0	0	1	0	1	0	0	1	0	4	1
0	0	6.66667	0	1	0	0	0	0	1	0	0	1	1	1	0	0	1	0	3	0
0	0	7	0	1	0	0	0	0	1	0	0	1	1	1	0	1	1	0	2	1
0	0	8.92857	0	1	0	1	0	1	1	1	1	0	0	1	1	0	1	0	4	0
0	0	11.25	0	1	0	1	0	1	1	1	0	1	1	0	0	0	1	0	4	0
1	0	7	0	1	1	0	0	1	1	0	0	0	1	1	0	1	1	0	1	0
0	0	10.4167	0	1	1	0	0	1	1	1	0	0	1	1	0	0	1	0	2	1
0	0	6.8	0	1	0	1	0	1	1	1	1	0	0	1	1	1	1	1	1	1
1	0	5	0	1	1	0	0	0	0	0	0	0	1	0	0	0	1	0	4	1
0	0	7	1	1	0	0	0	0	0	0	0	0	0	1	0	1	1	0	1	1
1	0	9.66667	0	1	0	0	0	0	1	0	0	1	0	1	0	0	1	0	2	1
1	1	3.57143	0	1	0	0	0	0	1	0	0	0	1	1	0	0	1	0	4	0
1	0	5.3125	0	1	0	0	0	0	0	0	0	0	0	1	1	0	1	1	4	1
1	0	7	0	1	0	1	0	0	0	0	0	0	0	1	0	0	1	0	4	1
1	0	3	0	1	0	1	0	0	1	0	0	0	0	1	0	0	1	0	4	0
0	0	5	1	1	0	1	0	0	0	0	0	0	1	1	0	0	1	0	2	1
0	0	8.61111	0	1	0	0	0	1	1	1	0	0	0	1	1	0	1	0	4	1
0	0	11.6667	0	1	1	1	0	0	0	0	0	0	1	1	0	0	1	0	4	1
0	0	11.6667	0	1	0	0	1	1	1	0	0	0	0	1	0	0	0	0	4	1
0	0	8.75	1	1	0	1	0	0	0	0	0	1	0	1	0	0	1	0	1	1
0	0	7	1	1	0	0	0	0	0	0	0	0	1	1	0	0	1	0	3	1
0	0	4	0	1	0	1	0	0	0	0	0	0	1	1	1	0	1	0	4	0
0	0	6.5625	0	1	0	1	1	0	1	0	0	0	0	1	0	0	1	0	4	1
0	0	12.5	0	1	0	1	1	0	1	0	0	0	1	1	0	0	0	0	4	1
0	0	7	0	1	0	0	0	0	1	0	0	0	0	1	0	0	1	0	4	1
0	1	4.66667	0	1	1	0	0	0	0	0	0	0	0	1	1	0	1	0	3	0
0	1	8.75	1	1	1	1	0	0	0	0	0	0	1	1	1	0	1	0	3	1
0	0	3.07143	0	1	0	0	0	0	1	0	0	0	0	1	1	0	1	0	4	1
0	0	18.75	0	1	0	0	0	1	1	0	0	0	0	1	0	0	1	0	4	1
0	0	11.6667	0	1	1	0	0	1	1	0	0	0	0	1	0	1	0	0	4	1
0	0	2.91667	1	1	0	1	0	0	0	0	0	0	0	1	0	0	1	0	4	0
0	0	3.5	1	1	1	0	0	0	0	0	1	0	0	1	0	1	1	0	1	0
0	0	12.6	1	1	1	1	0	0	0	0	0	1	0	1	1	0	1	0	4	0
0	0	4.66667	1	1	0	0	0	0	0	0	0	0	1	1	0	0	1	0	4	1
1	0	5	1	1	0	0	0	0	0	0	0	0	0	1	0	0	1	0	2	1
0	0	4.66667	0	1	0	0	0	0	0	0	0	0	1	1	1	0	1	0	4	1
0	0	5	1	1	1	1	0	0	1	0	0	0	0	1	0	0	1	0	3	1
0	0	2.8	1	1	0	0	0	0	0	0	0	0	1	0	0	0	0	0	4	1
0	0	1.75	0	1	0	1	0	0	0	0	0	0	0	1	0	0	1	0	4	1
0	0	#NULL!	#NULL!	1	0	0	#NULL!	#NULL!	#NULL!	#NULL!	#NULL!	#NULL!	0	1	#NULL!	#NULL!	#NULL!	#NULL!		1
0	0	3.625	0	1	1	0	0	0	1	0	0	0	0	1	0	0	1	0	3	1
0	0	7	0	1	0	0	0	0	0	0	0	0	0	1	0	1	0	0	4	0
0	0	2.8	1	1	1	1	0	0	0	0	0	0	0	0	0	0	1	0	4	1
0	0	8.75	1	1	1	1	0	0	0	0	0	0	0	1	1	0	1	0	4	1
1	0	10.5	0	1	0	0	0	0	1	0	0	0	1	1	1	0	1	0	2	1
0	0	11.6667	0	1	0	0	0	0	1	0	0	0	1	0	1	0	1	0	4	1
0	0	6.25	0	1	0	0	1	1	1	0	0	0	0	1	0	0	1	0	4	1
0	0	8.4	1	1	1	1	1	0	0	0	0	0	0	1	1	0	1	0	4	1
0	0	4.2	1	1	0	0	0	0	0	0	0	0	1	1	0	1	1	0	4	1
0	1	3	0	1	0	0	0	1	1	1	0	0	1	1	0	0	1	0	4	1
1	0	4.8125	0	1	0	0	0	1	0	0	0	1	0	1	0	0	1	0	2	1
0	0	15.5	0	1	0	0	0	1	1	0	0	0	0	1	1	0	1	0	4	0
0	0	8.4	1	1	0	1	0	0	0	0	0	0	1	1	0	0	1	0	4	1
0	0	2.1	0	1	0	1	0	0	0	0	0	0	0	1	1	0	1	0	4	1
0	0	4.375	1	1	0	0	0	0	0	0	0	0	1	0	0	0	1	0	4	#NULL!
0	0	3	0	1	1	1	0	0	0	0	0	1	0	0	1	0	1	0	4	1
0	0	5	1	1	1	1	0	0	0	0	0	1	0	0	1	0	1	0	4	1
0	0	8	0	1	1	0	0	1	1	1	0	0	0	1	0	0	1	0	4	0
0	0	7	1	1	0	0	0	0	0	0	0	0	0	1	1	0	1	0	4	1
0	0	5	0	1	1	0	0	0	0	0	0	0	0	1	0	0	1	0	4	0
1	0	5.25	0	1	1	0	0	0	0	0	0	0	0	0	0	1	1	0	4	1
1	0	4.75	1	1	0	0	0	0	1	0	0	0	1	0	0	0	1	1	4	1
0	0	7.75	0	1	0	0	0	1	1	1	0	0	1	1	1	0	1	0	1	1
0	0	4.66667	1	1	0	1	0	0	0	0	0	0	1	1	1	0	1	0	4	1
0	0	8.75	0	1	1	0	0	0	0	0	0	0	0	1	0	0	1	0	4	1
0	0	7	0	1	0	0	0	0	1	0	0	0	1	1	1	0	1	0	4	1
0	1	6	0	1	1	1	0	0	1	1	0	0	0	1	0	0	1	0	4	1
0	0	11.6667	0	1	1	0	0	0	1	0	0	0	0	1	1	0	1	0	4	1
0	0	5.6	0	1	0	1	0	0	1	1	0	0	0	1	1	0	1	0	1	0
0	0	4.66667	1	1	1	1	0	0	0	0	0	0	0	0	1	0	1	0	4	0
0	0	8	1	1	0	1	0	0	0	0	1	1	0	1	0	0	1	0	4	1
0	0	2.625	1	1	0	1	0	1	0	0	0	0	1	1	1	0	1	0	1	1
0	0	3	1	1	0	1	0	0	1	0	0	1	1	0	1	0	1	0	1	1
0	0	7	1	1	0	0	1	0	0	0	0	1	1	1	1	0	1	0	4	1
0	0	3.5	1	1	0	0	0	0	0	0	0	1	1	1	0	1	1	0	4	1
0	0	7	0	1	0	0	0	0	1	1	0	0	0	0	1	0	1	0	4	1
0	0	12.25	0	1	0	0	0	0	0	0	0	0	1	0	0	0	1	0	4	1
0	0	4.66667	1	1	1	1	0	0	0	0	0	1	0	0	1	0	1	0	2	0
0	0	14	1	1	0	1	0	0	0	0	0	0	1	1	0	0	1	0	4	0
0	0	7	0	1	0	1	0	1	0	0	0	0	0	1	0	0	1	0	4	1
0	0	5.25	1	1	0	1	0	0	0	0	0	0	1	0	1	0	1	0	4	0
0	0	4.375	1	1	1	1	1	0	0	0	0	1	0	1	1	0	1	0	4	0
0	0	1.90909	1	1	0	1	0	0	0	0	0	0	1	0	1	0	1	1	4	0
0	0	5.25	0	1	1	0	0	1	0	0	0	0	1	1	0	0	1	0	4	0
1	1	4.2	1	1	0	1	1	0	0	0	0	1	0	0	0	0	1	0	4	1
0	0	7.04545	0	1	1	1	0	1	1	0	0	0	0	1	1	1	1	0	2	1
0	0	15.25	0	1	1	1	0	1	1	1	0	0	0	1	1	0	1	0	4	1
0	0	7	0	1	0	1	0	1	1	1	0	0	1	1	1	0	1	1	4	1
0	0	7.3	0	1	0	0	0	0	1	0	0	0	1	1	1	0	1	0	4	0
0	0	7.75	0	1	0	1	0	1	1	1	0	0	0	1	0	0	1	0	4	0
0	0	5.45	0	1	0	0	0	0	0	0	0	1	1	1	1	1	1	0	4	0
0	0	9.375	0	1	0	0	0	1	1	0	0	0	0	1	1	0	1	0	4	1
0	0	4.2	0	1	0	1	1	0	0	0	0	0	0	1	0	0	1	0	4	1
0	0	3.88889	1	1	0	1	0	0	0	0	0	1	1	0	0	0	0	0	4	1
0	0	8.75	1	1	1	1	1	0	0	0	0	0	0	0	0	0	1	0	4	1
0	0	5.25	1	1	0	1	1	0	0	0	0	0	1	0	0	0	1	0	4	0
0	0	5.25	1	1	1	1	0	0	1	0	0	0	1	1	0	0	1	0	4	1
0	0	1.75	1	0	0	1	0	0	0	0	0	0	1	1	0	0	0	0	4	1
0	0	9.33333	1	0	1	0	0	0	0	0	0	0	0	0	0	0	1	0	4	1
0	0	7	1	0	0	1	0	0	0	0	1	1	1	0	0	0	1	0	4	1
0	0	7	1	0	1	1	0	0	0	0	0	1	1	0	0	0	1	0	4	1
0	0	3.88889	1	0	0	1	0	0	0	0	0	0	1	1	1	0	1	0	1	1
0	0	9.33333	1	0	0	1	0	0	0	0	0	0	1	1	0	0	1	0	4	0
0	0	5.83333	1	0	0	1	0	1	0	0	0	0	1	0	0	#NULL!	1	0	4	0
0	0	14	0	0	0	0	0	0	0	0	0	0	0	1	1	0	1	0	4	0
1	0	11.6667	0	0	0	0	0	0	0	0	0	0	1	0	1	0	1	0	4	0
1	0	4.66667	1	0	1	1	0	1	0	0	1	0	0	1	1	0	0	0	4	1
0	0	5.25	1	0	0	0	0	0	1	0	0	0	1	1	0	0	1	0	4	1
1	0	4.66667	1	0	1	1	0	0	0	0	0	0	1	1	1	0	1	0	4	0
0	0	4.2	1	0	0	1	0	0	1	0	1	0	1	0	1	1	0	0	2	1
0	0	8.75	1	0	0	1	0	0	0	0	0	0	1	0	1	0	1	0	4	1
0	0	2.33333	0	0	0	1	1	0	1	0	0	0	1	0	0	0	0	0	4	1
0	0	5	1	0	1	1	0	0	0	0	0	0	0	1	0	1	1	1	4	1
0	0	7	1	0	0	1	0	0	0	0	0	0	0	1	0	1	1	0	4	1
0	0	8.75	1	0	0	1	0	0	0	0	0	1	1	1	0	0	0	0	4	0
1	0	7.83333	0	0	1	0	0	1	0	0	1	0	0	1	0	0	1	1	4	0
1	0	4.9	1	0	1	1	0	1	0	0	0	0	0	1	0	0	1	0	4	0
0	0	4.375	1	0	1	1	0	0	0	0	0	0	0	1	0	0	0	0	4	1
0	0	5.25	0	0	0	1	0	1	0	0	1	0	1	1	0	0	0	0	4	1
0	0	2.33333	1	0	0	1	0	1	0	0	0	1	1	1	1	0	1	0	4	1
0	0	4.66667	1	0	1	#NULL!	#NULL!	#NULL!	#NULL!	#NULL!	#NULL!	#NULL!	0	1	1	0	0	0	4	0
0	0	1.75	1	0	1	1	0	0	0	0	0	1	0	0	0	0	1	0	4	0
0	0	7	1	0	0	1	0	0	0	0	1	1	1	1	1	0	1	0	4	0
0	0	5.6	1	0	0	1	0	1	0	0	0	1	1	1	0	0	1	0	4	0
0	0	5.25	1	0	0	0	0	0	0	0	0	0	1	0	1	0	0	0	4	1
0	0	5	1	0	0	1	0	0	0	0	0	0	0	1	0	0	1	0	4	0
0	0	2	1	0	1	1	0	1	0	0	1	0	0	1	0	0	1	0	4	1
0	0	3.81818	1	0	1	1	1	1	1	0	0	0	0	0	1	0	1	1	4	1
0	0	4.66667	1	0	0	0	0	1	0	0	0	1	1	1	0	#NULL!	0	0	4	0
0	0	11.6667	1	0	0	0	0	0	0	0	0	0	1	1	0	#NULL!	0	0	4	0
0	0	14	1	0	0	0	0	0	0	0	0	0	1	1	1	0	0	0	4	0
0	0	6	1	0	0	0	0	0	0	0	0	0	1	0	0	0	1	0	4	1
0	0	2.625	1	0	1	1	0	0	0	0	0	0	0	0	0	0	1	0	4	0
0	0	4.2	1	0	0	1	0	0	0	0	0	0	1	1	0	0	1	0	4	1
0	0	4.57143	1	0	1	1	0	0	0	0	0	1	0	0	0	#NULL!	1	0	4	1
0	0	8.16667	0	0	0	1	0	0	0	0	0	0	1	1	0	0	1	0	4	1
0	1	9.33333	1	0	0	0	0	0	0	0	0	0	1	1	0	0	1	0	1	1
0	1	5.25	1	0	0	1	1	0	0	0	0	1	1	1	0	0	1	0	2	1
0	0	5.25	1	0	1	1	0	0	0	0	0	1	1	1	0	0	0	0	4	1
0	0	6.125	0	0	1	1	0	0	0	0	0	0	1	1	1	0	0	0	4	0
0	0	10.5	1	0	0	1	1	0	0	0	0	0	1	1	1	0	1	0	4	1
1	0	7	0	0	0	1	0	0	0	0	0	0	1	0	0	0	1	0	4	1
0	0	10	1	0	1	1	0	1	0	0	0	0	1	1	1	0	1	0	4	0
0	0	8.75	1	0	0	1	0	1	0	0	1	1	0	0	1	0	1	0	4	0
0	0	4.375	1	0	0	1	0	0	0	0	0	0	0	0	1	0	1	0	1	1
1	0	9.33333	0	0	0	1	0	0	0	0	0	0	0	1	0	0	0	0	4	0
0	0	4.2	1	0	1	1	0	0	0	0	0	0	1	1	1	0	1	0	4	1
0	0	5.25	1	0	0	0	0	1	0	0	0	0	1	0	0	0	0	0	4	0
1	0	7	1	0	0	1	0	1	0	0	0	0	0	0	1	0	0	0	1	1
0	0	4.08333	0	0	0	1	0	0	1	0	0	0	1	1	1	0	1	0	4	1
1	0	3.11111	0	0	1	1	0	0	0	0	0	0	1	1	0	1	1	0	2	0
0	0	3.5	1	0	1	#NULL!	0	#NULL!	#NULL!	#NULL!	#NULL!	#NULL!	1	0	0	#NULL!	1	0	4	1
0	0	5.83333	0	0	0	1	0	0	1	0	1	0	1	1	1	0	1	0	4	1
0	0	5.25	1	0	0	#NULL!	0	#NULL!	#NULL!	#NULL!	#NULL!	#NULL!	1	0	0	0	1	0	4	1
0	0	5.25	1	0	0	1	0	0	0	0	0	0	1	1	0	#NULL!	1	0	4	1
0	0	7	0	0	0	1	0	1	0	0	0	0	1	1	1	0	1	0	4	1
0	0	11.6667	1	0	0	1	0	0	0	0	0	0	1	1	0	0	0	0	4	0
0	0	5.25	1	0	0	1	0	1	0	0	1	0	1	1	0	1	1	0	1	1
0	0	5.25	1	0	0	1	0	0	0	0	0	0	1	1	0	0	1	1	4	0
0	0	7	1	0	0	1	0	0	0	0	0	1	0	1	1	0	1	0	4	0
0	1	4.2	1	0	0	0	0	0	0	0	0	0	1	1	1	0	1	0	4	1
0	0	7	1	0	0	1	0	1	0	0	0	1	1	1	1	0	1	0	4	0
0	0	5.83333	0	0	0	1	0	0	0	0	0	0	1	0	0	0	1	1	2	1
0	0	5.25	0	0	0	1	0	0	1	0	0	0	0	1	0	0	1	1	1	1
0	0	7.15	0	1	0	0	0	0	0	0	1	0	1	1	0	1	1	0	4	0
0	0	14.5833	0	1	1	0	0	0	0	0	0	1	0	1	0	0	1	0	2	1
0	0	7.08333	0	1	0	0	0	0	0	0	0	0	0	1	1	1	1	0	1	1
0	0	5.25	0	1	1	0	0	1	1	0	0	1	0	0	0	#NULL!	1	0	4	1
0	0	9.6875	0	1	0	1	0	1	1	1	0	0	0	1	1	1	1	0	4	1
0	0	9.375	0	1	1	0	0	1	1	1	0	0	0	1	1	0	0	0	4	0
0	0	3.3	0	1	0	0	0	1	1	0	0	0	0	1	0	0	1	0	4	1
0	0	10.05	0	1	0	0	0	1	1	0	0	0	0	0	0	1	1	0	4	0
0	0	11.8333	0	1	1	0	0	1	1	0	0	0	0	1	1	1	1	1	4	0
0	0	5.5625	0	1	1	0	0	1	1	0	0	0	0	1	0	0	0	0	4	1
0	0	5.85	0	1	0	0	0	1	1	0	0	0	0	1	1	0	1	0	4	1
0	0	7.2	0	1	1	0	0	1	1	0	0	0	0	1	1	1	1	0	4	1
0	0	7.08333	0	1	0	0	0	0	1	0	0	0	0	1	0	1	0	0	1	1
1	0	10.5312	0	1	0	0	0	0	1	0	0	1	0	1	1	0	0	0	2	0
0	0	7.08333	0	1	1	0	0	1	1	0	1	0	0	0	0	1	1	0	1	1
0	0	9.5	0	1	0	1	0	1	1	0	1	0	0	1	1	0	1	0	1	1
0	1	2	1	1	1	1	0	0	0	0	0	0	1	0	0	0	0	0	1	1
0	0	7.14286	1	1	1	0	0	0	0	0	0	1	1	1	0	1	0	0	4	1
0	0	12.25	1	1	0	0	0	0	0	0	0	1	1	1	0	1	1	0	1	1
0	0	11.1111	0	1	1	1	0	0	1	0	0	0	0	1	1	1	1	1	1	1
0	0	5	0	1	1	0	0	0	0	0	1	0	1	1	0	#NULL!	0	0		#NULL!
0	1	7	1	1	1	0	0	0	1	0	0	0	1	1	0	1	0	0	1	0
1	1	9.0625	0	1	0	0	1	0	1	1	0	1	1	1	0	0	1	0	2	1
0	0	6.66667	1	1	1	0	0	0	0	0	0	1	1	0	0	0	0	0	2	1
1	0	3.59375	0	1	1	1	0	1	1	1	0	0	0	1	0	0	0	0	4	1
0	0	5	1	1	0	1	0	0	1	0	0	0	1	1	0	0	1	0	4	1
0	0	4	1	1	0	1	0	0	0	0	0	1	1	1	0	0	0	0	4	1
0	0	24.5833	0	1	1	1	0	0	0	0	0	1	0	1	0	0	1	0	2	1
1	0	7.25	0	1	0	0	0	1	1	1	0	0	0	1	0	0	0	1	4	1
0	0	6.66667	1	1	0	1	0	0	0	0	0	1	0	0	0	0	0	0	4	0
1	0	3.93182	1	1	0	1	0	0	1	0	1	0	1	1	0	1	0	0	4	1
0	0	5	1	1	0	1	0	0	0	0	1	0	0	1	0	0	1	1	2	#NULL!
0	1	4.66667	0	1	0	0	0	0	0	0	0	0	1	1	0	0	1	0	2	1
0	0	5.83333	1	1	1	0	0	0	0	0	0	0	1	0	0	1	0	1	2	1
0	0	7	1	1	0	1	0	0	0	1	0	0	1	1	0	1	0	0	2	1
1	0	4.2	1	1	0	0	0	0	1	0	0	1	1	1	0	1	1	0	1	1
0	0	7	1	1	1	1	0	0	0	0	0	0	0	0	0	1	1	0	2	1
0	0	5	1	1	0	0	0	0	0	0	1	1	1	1	1	0	1	0	4	1
1	0	3.5	1	1	0	1	0	0	0	0	0	0	0	0	0	1	0	0	4	1
0	0	7	0	1	0	0	0	0	0	0	0	1	1	1	0	1	0	0	3	1
0	1	5.25	1	1	0	0	0	0	1	0	0	1	0	1	0	#NULL!	0	1	4	1
0	0	7.5	0	1	0	1	0	0	0	0	0	1	0	1	0	1	0	1	2	0
0	0	2.625	0	1	0	1	0	0	1	0	0	1	1	1	0	0	0	1	4	1
0	0	7	0	1	0	1	0	0	1	0	0	0	0	1	0	#NULL!	0	1	4	1
0	0	8.33333	1	1	0	1	0	0	0	0	0	1	1	1	0	0	1	0	1	1
0	0	7	0	1	0	1	0	1	1	1	0	0	1	1	0	0	0	0	3	1
0	0	6.4	0	1	0	0	0	0	0	0	1	1	1	1	0	#NULL!	0	0	4	1
0	0	5.6	0	1	0	1	0	0	0	0	0	1	0	0	0	0	0	0	4	0
1	0	11.6667	1	1	0	0	0	0	1	0	0	1	1	1	0	1	1	0	4	1
0	1	7	0	1	1	1	0	0	1	1	0	1	0	1	0	1	0	1	3	1
0	0	7	1	1	1	1	0	0	1	0	1	1	1	1	0	0	1	0	4	1
0	0	5.71429	0	1	0	1	0	0	0	0	0	1	1	0	1	0	1	0	4	1
1	0	12.5	0	1	0	1	#NULL!	#NULL!	#NULL!	#NULL!	#NULL!	#NULL!	0	1	1	0	1	0	4	1
0	1	5	1	1	0	0	0	0	0	0	0	1	0	0	0	1	0	1	4	1
0	0	5	0	1	0	1	#NULL!	#NULL!	#NULL!	#NULL!	#NULL!	#NULL!	1	1	1	1	1	0	4	1
0	0	5.25	0	1	0	1	0	0	0	0	1	1	0	1	0	0	0	0	4	1
0	0	10	0	1	0	1	0	0	0	0	0	1	1	0	1	0	1	0	4	1
0	0	8	0	1	0	1	0	0	1	0	1	0	1	1	0	1	1	0	4	0
0	0	7.5	0	1	0	1	0	0	1	0	1	1	0	1	0	1	1	1	4	0
0	0	6	1	1	0	0	0	0	1	0	0	1	1	0	0	0	0	0	1	1
0	0	11.6667	1	1	0	0	0	0	0	0	0	1	0	0	0	#NULL!	1	1	2	1
0	0	5	0	1	0	1	0	1	1	0	0	1	0	1	0	1	1	1	3	1
0	0	6.25	0	1	0	0	0	0	0	0	1	1	0	1	0	1	0	0	1	1
0	0	10	1	1	0	0	0	0	0	0	1	1	0	1	0	1	0	0	1	1
0	1	7.91667	0	1	0	1	0	1	1	1	0	0	0	1	1	1	0	0	1	0
0	1	10.5	0	1	0	0	0	1	1	0	0	0	1	1	0	1	1	1	4	1
0	0	5	1	1	0	1	0	0	0	0	1	1	1	1	0	1	1	0	4	0
0	0	9.35	0	1	0	1	1	1	1	1	0	0	0	1	0	1	0	0	4	1
0	1	10	0	1	1	0	0	0	1	0	0	0	0	1	0	1	0	0	3	0
0	0	6.38889	0	1	1	1	0	1	1	1	0	0	0	1	1	1	1	0	2	1
0	0	8.25	0	1	0	0	0	0	1	0	0	1	1	1	0	1	1	0	4	0
0	0	15.3438	0	1	1	0	0	0	1	0	1	0	1	1	0	1	1	0	2	0
0	0	5.89286	0	1	0	1	0	1	1	0	0	0	0	1	1	1	0	0	4	0
0	0	11.5625	0	1	1	0	0	1	1	0	0	0	0	1	1	0	0	0	4	1
0	0	2.5	0	1	0	1	1	0	0	0	1	1	1	0	0	1	0	1	4	1
0	0	5.83333	0	1	0	1	0	1	1	0	0	0	1	1	0	1	1	0	1	0
0	0	6.42857	1	1	0	1	0	0	0	0	0	1	0	0	0	1	1	0	4	0
1	0	3.33333	0	1	0	1	0	0	0	0	1	1	1	1	0	1	1	0	1	0
0	0	5.25	0	1	1	1	0	0	1	0	0	1	0	1	0	1	0	0	4	0
0	0	7.5	1	0	0	1	0	0	0	0	1	1	1	1	0	1	1	1	2	1
0	0	2.5	1	0	0	1	0	0	0	0	0	1	1	1	0	1	0	0	2	1
0	0	14	0	0	0	0	1	1	1	1	0	0	0	1	0	1	0	0	4	1
0	0	3.5	1	0	0	1	0	0	0	0	0	1	1	1	0	#NULL!	0	0	4	0
0	0	8.33333	1	0	1	1	0	0	0	0	0	0	0	1	0	1	0	1	4	0
0	0	8.75	1	0	1	0	0	0	0	0	0	0	0	1	0	0	1	0	4	0
0	0	5	1	0	1	0	0	0	0	0	0	0	1	1	0	1	1	0	4	1
0	1	7.5	1	0	1	1	0	0	0	0	0	0	1	0	0	#NULL!	0	0	1	1
0	0	6.66667	1	0	0	1	0	0	0	0	0	0	0	1	0	#NULL!	1	1	2	0
0	0	5	1	0	1	1	0	0	0	0	0	1	1	1	0	0	0	0	4	1
0	0	5.83333	1	0	1	1	1	0	0	0	1	1	1	1	0	0	1	0	4	1
0	0	8	1	0	0	1	0	0	0	0	0	0	1	1	0	0	1	0	2	1
1	0	6.25	1	0	0	1	0	0	0	0	0	0	0	1	0	0	1	0	1	1
0	0	11.5625	0	0	0	1	1	1	1	1	0	0	0	1	1	1	1	0	2	1
1	1	4.375	1	0	0	1	0	0	0	0	1	1	1	1	0	1	1	0	2	1
0	0	4.44444	1	0	1	1	0	0	0	0	0	1	0	0	0	1	1	0	4	0
0	0	4	1	0	0	1	0	0	0	0	1	1	1	0	0	1	1	0	4	1
1	0	7.14286	1	0	0	1	0	1	0	0	0	0	1	1	0	1	1	0	2	0
1	0	4	1	0	0	1	0	0	0	0	0	1	1	1	0	1	0	0	2	0
0	0	6	0	0	1	1	1	0	0	0	0	1	0	1	0	1	0	0	1	0
0	0	8.33333	1	0	0	1	0	0	0	0	0	0	1	0	0	1	1	0	4	0
0	0	8.75	1	0	0	1	0	0	0	0	0	1	0	0	0	1	0	0	4	0
1	0	8.75	1	0	1	1	0	1	0	0	0	1	1	1	0	1	0	0	2	0
0	0	3.5	1	0	1	0	0	0	0	0	0	1	1	0	0	#NULL!	0	0	4	1
0	0	2.5	1	0	0	0	0	0	0	0	0	1	0	0	1	1	0	0	4	0
0	1	5.71429	1	0	0	1	0	0	0	0	0	1	1	1	0	1	1	0	2	1
0	0	5.83333	1	0	0	1	0	0	0	0	1	1	1	1	0	1	1	0	4	0
0	0	2.5	1	0	0	1	0	0	0	0	0	1	1	1	0	1	0	0	4	0
0	0	2.8	1	0	1	0	0	0	0	0	0	1	1	0	0	1	1	0	2	0
0	1	8.75	1	0	0	1	0	0	0	0	0	0	1	1	0	1	1	0	2	0
0	0	5	1	0	0	0	0	0	0	0	1	1	1	1	0	1	1	0	2	0
0	0	7.5	1	0	0	1	0	0	0	0	1	0	1	0	0	0	0	0	4	1
0	0	11.6667	0	0	0	0	0	0	0	0	0	1	1	1	0	#NULL!	1	0	4	0
0	0	8	1	0	0	1	0	0	0	0	0	0	1	1	0	1	1	0	4	1
0	0	7	1	0	0	0	1	0	0	0	0	0	1	1	0	#NULL!	1	0	4	1
0	0	6	1	0	0	0	0	1	0	0	1	1	1	0	0	0	1	0	4	1
0	0	5	1	0	0	0	0	0	0	0	1	1	1	1	0	#NULL!	1	0	4	1
0	0	3.75	1	0	1	1	0	1	0	0	1	1	1	1	0	1	1	0	4	1
0	0	7	0	0	0	0	0	0	0	0	0	0	1	1	0	1	1	0	4	1
0	0	8.75	0	0	0	0	0	1	0	0	1	1	1	1	1	1	0	0	4	0
0	0	4.2	1	0	0	1	0	0	0	0	1	1	0	1	0	#NULL!	0	0	4	0
0	0	6.25	1	0	0	1	0	0	0	0	0	0	1	1	0	1	1	0	2	0
0	0	2.5	1	0	0	0	0	0	0	0	0	1	1	0	0	#NULL!	1	0	4	0
0	0	7	1	0	0	0	0	0	0	0	0	1	1	1	1	1	1	0	2	1
0	0	3.33333	1	0	0	0	0	0	0	0	1	1	0	0	0	#NULL!	0	0	4	0
0	0	6.66667	1	0	1	1	0	0	0	0	1	0	0	1	0	#NULL!	1	0	4	1
0	0	#NULL!	0	0	0	1	0	1	1	0	0	0	0	1	0	1	1	0	1	1
1	0	4.375	1	0	0	1	1	1	0	0	0	0	1	1	0	1	1	0	4	1
0	0	4.16667	1	0	0	1	0	0	1	0	1	0	0	1	0	1	1	0	3	0
0	1	7	1	0	0	1	0	1	0	0	1	0	0	1	0	1	1	0	4	0
1	0	5	1	0	1	1	0	0	0	0	1	0	0	1	0	1	1	0	4	1
0	1	7	0	0	0	1	0	0	0	0	0	0	1	0	0	1	1	0	4	1
0	0	7	1	0	0	1	0	0	0	0	1	1	1	0	0	#NULL!	0	0	4	1
0	0	11.6667	1	0	0	1	1	1	0	0	0	0	1	1	0	1	1	0	4	1
0	0	4	0	0	0	0	0	0	0	0	0	0	1	1	0	1	1	0	4	1
0	0	3.57143	1	0	1	1	0	0	0	0	1	1	1	0	0	1	1	0	4	0
0	0	5	1	0	1	1	0	0	0	0	0	0	1	0	0	#NULL!	1	0	4	0
0	0	7	0	0	0	1	0	1	1	1	0	0	1	0	1	1	1	0	3	0
0	1	7.5	1	0	1	1	0	0	0	0	0	1	0	1	0	#NULL!	1	0	4	1
0	0	5.71429	1	0	0	1	0	0	0	0	0	1	1	1	0	1	1	0	4	1
0	0	5.55556	0	0	1	1	0	0	0	0	0	0	1	1	0	1	1	0	2	1
0	0	7.8125	0	1	1	0	0	0	1	1	0	0	1	1	0	#NULL!	1	0	4	0
0	0	6.16667	0	1	0	1	0	1	1	1	0	0	1	1	0	1	1	0	4	0
0	0	7.5	0	1	0	0	0	1	1	1	0	0	0	1	0	0	0	0	4	1
0	0	4.16667	0	1	0	0	1	0	1	0	0	1	1	1	1	0	0	0	4	1
0	0	2.57143	0	1	0	0	0	1	1	1	0	0	0	1	1	1	1	0	4	1
0	0	5.83333	0	1	0	0	0	0	1	0	0	1	1	1	0	0	0	0	4	0
1	1	5.05	0	1	1	0	0	1	1	0	0	1	1	1	0	1	1	0	2	1
1	0	1.75	0	1	0	0	0	0	0	0	0	1	0	1	0	1	0	0	2	1
0	0	2.625	1	1	1	0	0	0	0	0	0	1	0	1	0	0	0	0	3	0
1	0	6.66667	1	1	0	0	0	0	0	0	1	1	0	1	0	0	1	0	4	0
0	0	11.6667	1	1	0	0	0	0	0	0	1	1	0	1	0	1	1	0	4	1
0	0	8.9375	0	1	0	0	0	0	0	0	0	1	0	1	0	1	0	0	3	1
1	1	11.9167	0	1	0	0	0	0	0	0	0	1	0	1	0	0	1	0	4	1
1	0	7	1	1	0	0	0	0	0	0	0	1	1	0	0	1	0	0	1	1
0	0	8.16667	1	1	1	0	0	0	0	0	0	1	1	1	0	1	1	0	1	1
1	0	7	1	1	0	0	0	0	0	0	0	1	1	0	0	1	1	0	3	1
0	1	4.2	1	1	0	0	0	0	0	0	1	1	1	1	0	1	1	0	4	1
0	0	4	1	1	0	0	0	0	0	0	0	1	0	1	0	0	1	0	4	1
0	1	2.625	1	1	1	1	0	0	0	0	0	1	1	1	0	0	1	0	4	1
0	0	6	1	1	0	0	0	0	0	0	0	0	0	0	0	0	0	0	2	1
1	0	7	0	1	0	0	0	0	0	0	0	1	1	1	0	#NULL!	0	0	4	0
1	1	5	0	1	0	0	0	0	1	0	0	1	1	1	1	0	0	0	4	0
0	1	0.0785714	1	1	0	1	0	0	0	0	0	1	1	0	0	#NULL!	0	0	2	1
0	0	7	1	1	0	0	0	0	1	0	0	1	1	1	0	1	0	0	4	1
1	0	9.0625	0	1	0	1	0	0	1	0	0	0	0	1	0	0	0	0	4	1
1	0	6.25	1	1	1	1	0	0	1	0	1	1	1	1	0	1	0	1	3	1
0	1	4	1	1	1	1	0	0	0	0	0	0	1	1	0	1	0	0	4	1
1	0	3.5	0	1	0	0	0	0	1	0	0	0	1	1	0	0	1	0	4	0
1	0	4.5	1	1	0	1	0	0	0	0	0	0	0	1	1	0	0	1	4	1
1	0	11.6667	0	1	0	0	0	0	1	0	1	0	0	1	1	0	1	0	4	0
0	1	5	1	1	0	1	1	0	0	0	1	0	0	0	0	0	0	1	1	1
0	1	14	0	1	0	1	0	0	1	0	0	0	1	0	0	0	0	0	4	1
0	1	3.5	1	1	0	0	0	1	0	0	0	0	0	1	0	0	0	0	4	0
1	0	5.6	1	1	1	0	0	0	0	0	0	0	1	0	0	0	0	0	4	1
0	0	#NULL!	0	1	0	0	1	1	1	0	0	1	1	0	0	1	0	0	4	1
0	1	3.5	0	1	1	0	1	1	1	0	0	1	1	1	1	0	0	0	3	1
0	0	1.25	0	1	0	0	1	1	1	0	0	1	1	1	0	0	0	0	4	1
0	0	1.25	0	1	0	0	1	1	1	0	0	1	1	0	0	0	0	0	4	1
1	0	1.25	0	1	0	1	0	1	1	1	0	0	0	1	1	0	1	1	4	1
0	0	1.90909	1	1	0	1	0	0	0	0	0	0	1	0	0	0	1	0	4	0
0	0	2.33333	1	1	0	1	0	0	1	0	0	0	0	0	0	1	0	0	4	1
0	1	8.16667	0	1	0	1	0	1	1	0	0	0	1	1	1	0	0	1	4	1
0	0	8.75	0	1	0	0	0	0	1	0	0	0	0	1	0	0	0	0	4	1
0	0	1.5	1	1	0	1	0	0	1	0	0	0	1	0	0	0	1	0	4	1
0	0	4.2	1	1	0	0	1	0	0	0	0	1	0	1	0	1	0	0	4	1
0	0	0.583333	1	1	1	1	0	0	0	0	0	0	0	1	0	0	1	0	4	1
0	1	2	1	1	0	1	0	1	0	0	0	0	0	0	0	1	0	0	4	1
0	0	7	1	1	1	1	0	0	0	0	0	0	1	1	0	0	0	0	4	1
0	0	1	1	1	0	1	0	1	0	0	1	0	1	1	1	0	1	1	4	1
0	0	7	1	1	1	1	0	0	0	0	0	0	0	1	0	0	1	0	4	1
1	0	10	0	1	1	1	0	0	0	0	1	0	0	1	1	0	0	0	4	1
0	0	5	0	1	1	1	0	1	1	0	1	0	0	1	1	1	0	0	4	1
0	0	1.16667	1	1	0	1	0	0	0	0	0	0	1	1	0	1	1	0	1	1
0	1	0.833333	0	1	1	1	0	0	1	0	0	0	0	1	1	1	0	0	4	1
0	0	3.5	1	1	0	1	0	0	0	0	0	0	1	0	1	1	0	0	1	1
0	0	0.333333	0	1	0	1	0	1	1	0	0	0	1	0	0	0	0	0	4	1
0	0	5	0	1	0	1	0	0	1	0	0	0	0	1	1	0	1	1	3	1
0	0	7	0	1	1	0	0	0	0	0	0	0	0	1	0	1	1	0	3	1
0	0	0.428571	0	1	0	1	0	0	0	0	0	0	1	1	1	0	0	0	4	0
0	0	8.75	1	1	0	1	0	0	0	0	0	0	0	1	0	1	1	0	1	1
0	0	7	0	1	0	1	0	1	1	0	0	0	0	1	1	0	1	1	1	0
0	0	5.83333	0	1	1	1	0	0	0	0	1	0	0	1	0	1	1	0	4	1
0	0	0.6	1	1	1	1	0	1	0	0	0	0	1	0	0	1	0	0	4	1
0	0	1.25	1	1	1	0	0	0	0	0	1	0	1	1	0	0	1	0	2	1
1	0	3.25	0	1	1	0	0	1	1	1	0	0	0	1	1	1	1	1	2	1
0	0	12.5	0	1	1	0	0	1	1	1	1	0	1	1	0	0	1	0	4	1
1	0	0.525	0	1	0	1	0	0	0	0	1	0	1	1	0	0	0	0	4	1
0	0	11.6667	1	1	0	0	0	0	0	0	0	0	1	0	1	0	0	1	1	1
0	0	4.66667	0	1	1	1	0	0	0	0	0	1	1	1	0	0	1	0	4	1
0	0	17.5	1	1	0	0	0	0	0	0	0	0	0	0	0	1	0	0	1	1
0	0	2.33333	1	1	1	1	0	0	0	0	0	0	1	0	0	#NULL!	0	0	4	1
0	0	3.63636	1	1	1	1	0	1	0	0	0	0	0	1	0	1	0	0	2	0
0	1	6.125	1	1	0	1	0	0	0	0	1	0	1	0	0	0	0	1	4	1
1	0	5	1	1	0	0	0	0	0	0	0	0	1	1	0	0	1	0	4	1
0	0	5	0	1	1	0	0	1	1	1	0	0	1	0	0	1	0	0	2	1
0	0	2	1	1	0	#NULL!	1	#NULL!	#NULL!	#NULL!	#NULL!	#NULL!	1	1	0	0	0	0	2	1
0	0	1.4	1	1	0	#NULL!	0	#NULL!	#NULL!	#NULL!	#NULL!	#NULL!	1	0	0	0	0	0	4	1
0	0	5.83333	1	1	0	1	0	0	0	0	0	0	1	0	0	0	0	0	4	0
1	0	2.8	1	1	0	1	0	0	0	0	0	0	0	0	0	0	0	0	1	0
0	0	4.2	1	1	1	1	0	0	0	0	1	0	1	1	0	1	1	0	4	1
0	0	9.8	0	0	0	1	0	1	1	1	0	0	0	1	1	0	1	0	4	0
0	0	7	1	0	1	0	0	1	1	0	0	0	0	1	0	1	1	0	4	1
0	0	4.2	0	0	0	0	0	0	0	0	0	0	1	1	0	0	0	1	4	1
0	0	7	1	0	0	0	0	0	0	0	0	0	1	1	1	0	0	1	4	1
0	0	4.16667	1	0	0	1	0	0	0	0	0	0	0	0	0	1	1	0	4	1
0	0	8.75	0	0	0	1	0	0	0	0	0	0	1	1	1	0	0	0	4	1
0	1	3.5	0	0	1	0	0	0	0	0	1	0	1	1	0	1	1	0	4	1
0	0	5.25	1	0	1	1	0	0	0	0	0	0	1	0	0	1	0	0	4	1
0	0	3.5	1	0	0	0	1	0	0	0	0	0	1	0	1	0	0	0	4	1
0	0	5.5	0	0	1	0	0	0	1	0	0	0	1	0	0	0	0	0	1	1
0	0	4.08333	1	0	1	1	0	0	1	0	0	0	1	0	0	0	0	0	2	1
0	0	2.8	1	0	0	1	0	0	0	0	0	0	1	0	1	0	0	0	4	1
0	0	7	0	0	0	1	0	0	0	0	0	1	1	1	0	1	1	0	4	1
0	0	4.375	1	0	0	1	0	0	0	0	0	0	1	1	0	#NULL!	0	0	4	1
0	0	5	1	0	1	1	0	1	0	0	0	0	1	0	0	0	1	0	4	1
0	0	4.66667	1	0	0	1	0	1	0	0	0	0	1	1	1	0	0	0	4	0
0	0	5	1	0	0	0	0	1	0	0	0	0	0	1	0	0	1	0	4	0
0	0	3.5	1	0	0	1	0	1	0	0	0	0	1	1	1	0	1	0	4	0
0	0	5.83333	1	0	0	1	0	0	0	0	0	0	0	1	0	0	1	0	4	1
1	0	2.33333	1	0	0	1	0	0	0	0	0	0	0	0	0	#NULL!	0	0	4	1
0	0	4.2	0	0	1	0	0	1	0	0	0	0	1	1	0	0	0	0	3	1
0	0	3.88889	1	0	1	1	0	0	0	0	0	1	1	0	0	#NULL!	0	0	4	1
0	0	6	1	0	1	0	0	0	0	0	0	1	0	0	0	0	1	0	4	1
0	0	4.66667	1	0	0	1	1	0	0	0	0	0	1	0	0	0	0	0	4	0
0	0	5	0	0	1	1	0	1	1	0	0	0	1	0	1	0	0	0	4	1
0	0	3.125	1	0	1	1	#NULL!	#NULL!	#NULL!	#NULL!	#NULL!	#NULL!	1	1	0	0	1	0	4	1
0	0	7	1	0	1	1	0	0	0	0	0	0	0	0	1	0	0	0	4	0
0	0	5.6	0	0	0	1	0	0	0	0	0	0	0	1	0	#NULL!	1	1	4	1
0	0	4.66667	1	0	1	1	0	0	0	0	0	0	1	0	0	0	0	0	4	0
0	0	4.66667	1	0	1	1	1	0	0	0	0	0	1	1	0	#NULL!	0	0	4	1
0	0	3.5	1	0	0	1	0	0	0	0	1	0	1	0	0	0	0	0	4	1
0	0	7	1	0	1	1	0	0	0	0	0	0	1	0	0	#NULL!	1	0	4	0
0	0	4	0	0	0	1	1	0	0	0	1	0	1	1	0	0	0	0	4	1
0	0	1.75	1	0	0	1	0	0	1	0	0	0	0	1	0	#NULL!	0	0	4	1
0	0	5.6	1	0	0	0	0	0	0	0	0	0	1	0	0	1	1	0	4	1
0	0	5.25	1	0	0	0	0	0	0	0	0	0	1	1	0	1	0	0	4	1
1	0	4.2	0	0	0	1	0	0	0	0	1	0	1	0	0	1	1	0	4	1
0	0	6.66667	0	0	0	1	0	0	0	0	0	0	1	1	0	0	1	0	4	0
0	0	7	0	0	0	1	0	0	0	0	0	0	1	1	0	#NULL!	0	0	4	1
0	0	4.2	1	0	0	1	0	0	0	0	0	0	1	1	0	#NULL!	1	0	4	1
0	0	5.54167	0	0	0	1	0	1	1	1	0	0	1	0	1	1	0	0	4	1
0	0	5	1	0	0	1	0	0	0	0	1	0	1	0	1	0	1	0	4	1
0	0	4.375	0	0	0	1	0	0	0	0	0	0	1	1	1	0	1	0	4	0
0	0	3.5	0	0	0	1	0	1	1	0	0	0	0	1	1	1	0	0	4	0
0	0	4.2	0	0	0	1	0	0	0	0	0	0	0	1	0	#NULL!	0	0	4	0
0	0	3.5	0	0	0	1	0	0	0	0	0	0	1	0	0	#NULL!	0	0	4	1
0	0	11.6667	0	0	0	1	0	0	1	0	1	0	0	1	1	0	1	0	4	1
0	0	7	0	0	1	1	0	0	0	0	0	0	1	1	0	0	1	0	4	1
0	0	8.75	1	0	0	0	0	0	0	0	0	0	1	1	1	#NULL!	0	0	4	1
1	0	5.71429	0	0	0	0	1	0	0	0	0	0	1	0	1	#NULL!	1	0	2	1
0	0	7	0	0	1	1	0	0	0	0	0	0	0	1	0	0	1	0	4	1
0	0	7	1	0	0	1	0	0	0	0	1	0	1	1	1	1	1	1	4	1
0	0	2.8	1	0	0	1	0	0	0	0	0	0	1	1	1	#NULL!	1	0	1	1
0	0	6.25	1	0	0	1	0	0	0	0	0	0	1	1	1	0	0	0	4	1
0	0	3.5	0	0	1	1	0	0	0	0	0	0	1	1	1	0	1	0	4	1
0	0	3.13462	0	1	0	1	0	1	1	0	0	0	0	1	1	0	1	0	4	1
1	0	4.66667	0	1	0	0	0	0	0	0	0	0	0	1	1	1	0	1	4	1
0	0	3	1	1	0	1	0	0	0	0	1	0	1	1	1	0	0	1	4	1
0	0	4.375	1	1	0	1	0	0	1	0	0	0	1	1	1	0	1	0	4	0
0	0	7.5	1	0	1	1	0	0	0	0	0	0	1	0	1	1	1	0	1	1
0	0	5	0	0	1	1	0	1	1	0	0	0	1	0	1	0	0	0	4	0
0	0	2.08333	1	0	1	1	1	1	0	0	0	0	1	0	1	#NULL!	0	0	3	0
0	0	3.5	1	0	1	1	0	0	0	0	0	1	1	0	1	1	0	0	4	0
1	0	12.5	0	1	0	1	0	1	1	1	0	0	1	1	1	1	1	0	4	1
0	0	0	0	1	0	1	0	0	0	0	1	0	1	0	1	0	0	0	4	1
0	0	3.84615	0	1	0	1	0	0	1	0	0	0	1	0	0	1	1	0	4	1
0	0	5.25	0	1	0	0	0	1	1	0	0	0	1	1	1	1	0	0	4	0
0	0	4.28571	1	1	0	1	0	0	0	0	0	0	1	1	1	0	0	0	4	1
1	0	7	1	1	1	1	0	0	1	0	0	0	1	0	1	0	0	0	2	1
0	0	13.75	0	1	0	1	0	0	1	0	0	0	1	1	1	1	1	1	4	1
0	0	6.78571	0	1	0	1	0	1	1	0	0	0	1	1	1	0	1	1	4	1
0	0	3.33333	1	1	0	1	0	0	0	0	0	0	1	1	1	0	1	1	4	0
1	0	4.44444	1	1	1	1	0	0	0	0	0	0	0	0	0	0	1	0	4	1
0	0	7	1	1	0	0	0	0	0	0	0	0	1	0	1	1	1	0	1	1
