# Supplementary material for: Comparison of analytical techniques to explain variability in stored drinking water quality and microbial hand contamination of female caregivers in Tanzania
Source: Royal Society of Chemistry journal article supplement (doi:10.1039/c8em00460a), 2019-01-01
Supplement: c8em00460a3.xlsx [file c8em00460a3.xlsx]

## Sheet: TEST_SWFIBMod_Feb2019
BL_RESP_WORK	BL_BAGAMOYO_TOWN_YN	BL_INFANT_YN	BL_PRIVATE_TOILET	BL_VISIBLE_FECES_YN	BL_LATRINE_ROOF_YN	BL_LATRINE_CEMENT_FLOOR_YN	BL_LATRINE_SEPTIC_YN	BL_LATRINE_PIT_COVER_YN	BL_LATRINE_FLIES_YN	BL_KIDS_OPEN_DEFECATION_YN	BL_H2O_SOURCE_ONSITE_YN	BL_WATER_TREAT_ACTIVE_YN	BL_STORED_WATER_COVERED_YN	BL_EXTRACTION_RISKY_YN	BL_HAND_WATER_CONTACT_YN	BL_SW_STORED_less24	BL_HOUSE_DIRT_FLOOR	BL_REGWEEKLY_EXP_perCapita	BL_DIARRHEA_ANYONE_YN	BL_H2O_Improved	BL_log_H_EC	BL_SW_EC_CAT
0	1	0	1	0	0	1	0	0	0	0	0	0	1	1	0	0	0	8750	0	1	3.26007	2
1	1	1	0	0	0	1	0	0	0	1	1	1	1	1	0	0	0	1111.11	0	1	3.62978	2
1	1	0	0	0	1	1	1	0	0	0	0	#NULL!	1	#NULL!	#NULL!	#NULL!	0	7416.67	0	1	2.99404	#NULL!
0	1	1	0	1	0	0	0	0	0	0	0	0	1	1	0	1	1	7000	0	1	3.89184	1
0	1	1	1	0	1	1	0	0	0	1	0	0	1	1	0	1	0	#NULL!	0	1	3.7068	2
0	1	0	0	0	1	1	0	0	0	0	0	0	1	1	0	0	0	6666.67	0	1	3.2661	1
0	1	0	0	0	0	0	0	0	0	1	0	0	1	1	0	0	0	7000	0	1	2.14613	2
0	1	0	0	0	0	1	0	0	0	1	0	0	1	1	0	1	0	#NULL!	0	1	3.63749	1
0	1	0	0	0	0	0	0	1	0	0	0	0	1	1	0	1	0	1333.33	0	1	4.20208	1
0	1	1	0	0	0	1	0	0	0	1	0	0	1	1	0	1	0	3333.33	0	1	3.54407	1
1	1	0	0	0	0	0	0	0	0	1	0	0	1	1	0	0	1	3500	0	1	2.8451	1
1	1	0	1	0	0	0	0	0	0	0	0	0	1	1	0	0	1	900	0	1	2.40577	2
1	1	0	1	#NULL!	#NULL!	#NULL!	#NULL!	#NULL!	#NULL!	1	0	0	1	1	0	0	0	571.75	0	1	3.28083	3
#NULL!	1	0	0	0	1	1	1	0	0	0	0	0	1	1	0	1	0	#NULL!	#NULL!	1	3.19728	1
1	1	0	1	0	0	0	0	0	0	0	0	0	1	1	0	1	1	1200	0	1	3.58546	1
1	1	0	1	0	0	0	0	0	0	0	0	1	1	1	0	1	0	8750	0	1	2.74819	3
0	1	0	0	0	0	0	0	0	0	1	0	0	1	1	0	1	1	5000	0	1	3.36361	3
0	1	0	0	0	0	0	0	0	0	0	0	1	1	1	0	0	0	750	0	1	2.02119	3
0	1	0	1	0	0	0	0	1	0	1	0	0	1	1	0	0	1	1000	0	1	1.24304	3
1	1	0	1	0	0	0	0	0	0	1	0	0	1	1	0	1	0	3050	0	1	3.20683	3
1	1	0	1	0	0	0	0	1	0	0	0	0	1	1	0	1	1	7777.78	0	1	3.8537	3
1	1	0	1	0	0	1	0	0	0	0	0	1	1	1	0	1	0	9218.75	0	1	3.92428	1
0	1	0	0	#NULL!	#NULL!	#NULL!	#NULL!	#NULL!	#NULL!	1	0	0	1	1	0	0	1	9333.33	1	1	4.09374	2
0	1	1	0	0	0	0	0	0	0	0	0	0	1	1	0	0	1	7000	0	1	2.24304	3
1	1	1	1	0	1	1	0	0	0	0	0	0	1	1	0	1	0	5700	0	1	1.54407	2
1	1	1	1	0	0	0	0	0	0	0	0	0	1	1	0	1	0	5000	0	1	3.08246	1
0	1	0	0	0	1	1	0	0	0	1	0	0	1	1	0	0	1	5000	0	1	#NULL!	2
0	1	0	1	0	1	0	0	0	0	1	0	0	1	1	0	1	1	2800	0	1	2.32222	2
0	1	0	1	0	1	1	0	0	0	0	1	1	1	1	0	1	0	3522.73	0	1	3.78371	2
1	1	1	0	0	0	1	0	1	0	0	0	0	1	1	0	1	0	11916.7	0	1	4.19728	3
0	1	0	0	0	1	1	0	0	0	0	0	0	1	1	0	0	0	7000	0	1	1.9798	2
1	1	0	1	0	1	1	0	1	0	0	0	0	1	1	0	0	0	3888.89	0	1	3.8451	2
1	1	0	1	0	0	0	0	1	0	1	0	0	1	1	0	1	1	1750	0	1	2.88649	2
1	1	0	0	0	0	0	0	0	0	1	0	0	1	1	0	1	0	5250	0	1	3.02119	2
0	1	1	1	0	0	0	0	0	0	1	0	#NULL!	1	1	0	0	0	2000	0	1	2.49831	3
1	1	0	1	0	0	0	0	0	0	1	0	#NULL!	1	1	0	1	0	7000	0	1	2.6902	1
1	1	0	1	0	0	0	0	0	0	1	0	1	1	1	0	0	1	7000	0	1	4.08814	2
1	1	0	1	0	0	0	0	0	0	1	0	0	1	1	0	0	1	7500	0	1	2.78143	2
1	1	0	1	0	0	0	0	0	0	1	0	0	1	1	0	1	1	9800	0	1	2.14613	2
0	1	0	1	0	0	0	0	0	0	1	0	0	1	1	0	1	1	4666.67	0	1	3.33646	2
0	1	1	0	0	0	1	0	0	0	1	0	0	1	1	0	0	0	4687.5	0	1	2.24304	1
1	1	1	0	0	1	1	0	0	0	0	1	1	1	1	0	0	0	12083.3	0	1	3.29994	3
1	1	0	0	0	0	1	0	0	0	0	0	0	1	1	0	0	1	4900	0	1	1.24304	2
0	1	0	0	0	0	0	0	0	0	0	1	1	1	1	0	0	0	9750	0	1	3.83105	3
1	1	0	1	0	1	1	1	0	0	0	1	0	1	1	0	0	0	12687.5	0	1	2.90062	1
0	1	1	1	0	0	1	0	0	0	0	0	0	1	1	0	0	0	7777.78	0	1	1.24304	2
0	1	1	0	0	0	0	0	0	0	0	0	0	1	1	0	0	0	5444.44	0	1	4.19198	2
0	1	0	1	0	0	0	0	0	0	1	0	0	1	1	0	0	1	4375	0	1	3.12385	2
1	1	0	0	0	1	1	1	0	0	1	1	0	1	1	0	0	0	13416.7	0	1	2.45692	1
0	1	0	0	0	1	1	0	0	0	1	0	0	1	1	0	0	0	16333.3	0	1	3.48855	3
0	1	1	1	0	0	1	0	0	0	0	1	1	1	1	0	0	0	7045.45	0	1	3.57749	1
0	1	0	1	0	0	0	0	0	0	1	0	0	1	1	0	1	1	4200	0	1	3.15685	3
0	1	0	1	0	0	1	0	0	0	0	0	0	1	1	0	0	0	2916.67	0	1	1.8451	1
0	1	0	1	0	0	1	0	0	0	1	0	0	1	1	0	0	0	7250	0	1	1.24304	1
0	1	1	1	0	0	0	0	0	0	1	0	0	1	1	0	0	1	3000	0	1	2.32222	2
1	1	0	1	0	0	0	0	0	0	0	0	0	1	1	0	0	0	4666.67	0	1	1.8451	2
1	1	0	0	0	0	1	0	0	0	0	1	1	1	1	0	1	0	7750	0	1	2.14613	3
0	1	0	1	0	1	1	0	0	0	1	1	0	1	1	0	0	0	10000	0	1	2.20165	2
0	1	1	0	0	1	1	0	0	0	0	0	0	1	1	1	1	0	3666.67	0	1	4.00918	2
1	1	1	0	1	1	1	0	0	0	0	1	1	1	1	0	0	0	4535.71	0	1	3.62653	1
0	1	0	1	0	0	0	0	0	0	0	0	1	1	1	0	0	1	8400	0	1	3.87189	3
0	1	0	0	0	0	0	0	0	0	1	0	0	1	1	0	0	0	5250	0	1	3.98698	1
1	1	0	0	0	0	1	0	0	0	0	0	0	1	1	0	0	0	8600	0	1	1.54407	2
0	1	0	0	1	0	1	0	0	0	1	1	0	1	1	0	0	0	7750	0	1	1.24304	2
0	1	0	0	1	1	1	0	0	0	0	0	0	1	1	0	0	0	9687.5	0	1	4.88846	3
0	1	0	1	0	1	1	1	1	0	0	1	1	1	1	0	0	0	12708.3	0	1	2.6902	1
0	1	1	0	0	1	1	0	1	0	1	0	0	1	1	0	0	0	5250	1	1	2.45692	2
0	1	0	1	0	0	0	0	0	0	1	0	0	1	1	0	1	1	5833.33	0	1	3.17754	1
0	1	0	0	0	1	1	0	0	0	1	0	0	1	1	0	0	0	8166.67	0	1	2.14613	2
0	1	0	0	0	0	0	0	0	0	0	0	0	1	1	0	0	0	9333.33	0	1	1.24304	1
1	1	0	1	0	0	0	0	1	0	1	0	1	1	1	0	1	1	6125	0	1	2.7068	1
0	1	1	1	0	1	1	0	0	0	0	1	1	1	0	0	1	0	#NULL!	0	1	2.54407	3
1	1	0	1	0	1	1	0	0	0	1	1	0	1	1	0	1	0	5333.33	0	1	1.24304	1
0	1	1	0	0	0	0	0	0	0	1	0	0	1	1	0	0	0	3500	0	1	4.20208	1
0	1	1	0	0	0	0	0	1	1	1	0	0	1	1	1	0	0	7500	0	1	2.54407	2
0	1	0	1	0	0	0	0	0	1	1	0	0	1	1	0	0	0	7000	0	1	2.8644	1
0	1	0	1	0	0	0	0	1	1	0	0	#NULL!	1	1	0	0	0	3888.89	0	1	3.4939	2
0	1	1	1	0	0	1	0	0	0	1	1	0	1	1	0	1	0	10500	0	1	3.11546	2
0	1	0	1	1	0	1	0	0	0	1	0	0	1	1	0	0	0	3181.82	0	1	1.54407	3
0	1	0	1	0	0	0	0	0	0	1	0	0	1	1	0	0	1	3500	0	1	2.44716	3
0	1	0	1	0	0	0	0	1	0	1	0	0	1	1	0	1	1	5000	0	1	1.8451	3
0	1	1	1	0	0	0	0	0	0	1	0	0	1	1	0	0	1	3500	0	1	2.02119	3
0	1	1	1	0	0	0	0	0	0	0	0	0	1	1	0	1	0	2500	0	1	3.43717	3
0	1	0	0	0	0	1	0	0	0	0	1	0	1	1	0	0	0	7312.5	0	1	1.24304	1
1	1	0	0	0	0	1	0	0	0	0	0	1	1	1	0	0	0	12437.5	0	1	1.24304	1
0	1	1	1	0	0	0	0	0	0	0	0	0	1	1	0	0	1	3181.82	0	1	1.24304	3
0	0	1	1	0	1	0	0	0	0	1	0	0	1	1	0	1	1	5000	0	1	3.71433	3
1	0	0	1	0	0	0	0	0	0	1	0	0	1	1	0	1	1	5600	0	1	1.54407	3
1	0	1	1	0	0	1	0	0	0	0	0	0	1	1	0	1	0	5000	0	1	1.8451	3
0	0	0	1	0	0	0	0	0	0	1	0	0	1	1	0	1	1	7000	0	1	3.85292	1
0	0	1	1	0	0	0	0	0	0	1	0	0	1	1	0	0	1	4200	0	1	3.27353	3
0	0	0	1	0	0	0	0	0	0	1	0	0	1	1	0	0	0	4375	0	1	2.6902	2
1	0	0	0	#NULL!	#NULL!	#NULL!	#NULL!	#NULL!	#NULL!	1	0	0	1	1	0	0	1	4200	0	1	2.02119	3
1	0	1	1	0	0	1	0	0	0	0	0	1	1	1	0	0	0	5000	0	1	4.25164	2
0	0	0	1	0	0	1	0	0	0	1	0	0	1	1	0	1	0	11666.7	0	1	2.02119	1
0	0	0	1	0	1	0	0	0	0	1	0	0	1	1	0	0	1	3000	0	1	1.54407	3
0	0	0	0	0	1	0	0	0	0	1	0	0	1	1	0	1	0	4200	0	1	2.02119	1
0	0	1	0	0	1	1	0	0	0	1	0	0	1	1	0	1	1	5250	0	1	3.08814	2
1	0	0	0	0	1	0	0	0	0	1	0	0	1	1	0	0	1	7000	0	1	1.24304	2
0	0	1	1	0	1	1	0	1	0	1	0	1	1	1	0	0	0	3500	0	1	2.32222	2
0	0	0	1	0	0	0	0	1	0	1	0	0	1	1	0	0	1	7000	0	1	1.24304	1
0	0	1	0	#NULL!	#NULL!	#NULL!	#NULL!	#NULL!	#NULL!	1	0	0	1	1	0	0	1	7000	0	0	1.24304	2
0	0	0	1	0	0	0	0	1	0	0	0	0	1	1	0	0	1	3500	0	0	1.24304	3
0	0	0	0	0	0	0	0	0	0	1	1	1	1	1	0	1	0	10000	0	0	1.24304	3
0	0	1	1	0	0	0	0	0	0	0	0	0	1	1	0	0	0	2625	0	1	2.32222	2
0	0	0	1	0	0	0	0	0	0	1	0	0	1	1	0	0	1	4200	0	0	1.24304	3
0	0	0	1	0	1	0	0	1	0	0	0	0	1	1	0	1	1	5250	0	0	1.24304	3
0	0	0	1	0	1	0	0	1	0	0	0	0	1	1	0	1	1	5250	0	1	4.4417	2
0	0	0	1	0	0	0	0	0	0	1	0	0	1	1	0	0	0	8750	0	1	1.24304	2
0	0	1	1	0	0	0	0	0	0	1	0	0	1	1	0	0	0	4000	0	1	1.24304	2
0	0	1	1	0	1	0	1	0	0	1	0	0	1	1	1	0	1	4375	0	1	1.24304	3
0	0	0	1	0	0	0	0	0	0	1	0	0	1	1	0	0	0	11666.7	0	1	1.24304	1
0	0	0	1	0	1	0	0	1	0	0	0	0	1	1	0	0	0	4200	0	1	1.24304	1
0	0	1	1	0	1	0	0	1	0	1	0	0	1	1	0	0	1	3500	0	1	1.24304	3
0	0	0	1	0	1	0	0	0	0	1	0	0	1	1	0	1	1	8750	0	1	1.80371	2
0	0	0	1	0	0	0	0	1	0	1	0	0	1	1	0	0	1	3500	0	0	3.08246	1
0	0	1	1	0	0	0	0	1	0	0	0	0	0	1	0	0	1	4200	0	0	2.54407	2
0	0	0	1	0	0	0	0	0	0	1	0	0	1	1	0	1	1	5250	0	0	3.24304	2
0	0	0	0	0	1	0	0	0	0	1	0	0	0	1	0	1	1	8400	0	0	1.24304	3
0	0	1	0	0	1	0	0	0	0	0	0	0	1	1	0	1	1	17500	0	0	2.02119	2
0	0	0	0	0	0	0	0	0	0	1	0	0	1	1	0	0	1	9333.33	0	0	1.24304	2
0	0	0	1	0	0	0	0	0	0	1	0	0	1	1	0	0	1	6000	0	0	2.74819	2
0	0	1	1	1	1	0	0	1	0	1	1	0	1	1	0	0	1	5250	0	0	1.54407	2
0	0	0	#NULL!	0	#NULL!	#NULL!	#NULL!	#NULL!	#NULL!	1	0	0	1	1	0	0	1	4200	0	0	1.54407	3
0	0	0	0	0	1	1	0	0	0	1	0	1	1	1	0	0	0	6187.5	0	0	2.14613	2
1	0	0	1	0	0	0	0	0	0	1	0	0	1	1	0	0	1	3888.89	0	0	2.58186	2
0	0	0	1	0	0	0	0	1	1	1	1	0	1	1	1	0	0	9333.33	0	1	1.24304	3
1	0	0	#NULL!	1	#NULL!	#NULL!	#NULL!	#NULL!	#NULL!	1	1	0	1	1	0	0	1	3500	1	1	1.24304	2
0	0	0	0	0	0	0	0	0	0	1	1	0	1	1	0	0	1	14000	0	1	1.24304	1
0	0	0	0	0	0	0	0	0	0	0	1	0	1	1	0	0	1	8166.67	0	1	1.80371	2
0	0	0	1	0	1	1	0	0	0	0	0	1	1	1	0	0	0	12291.7	0	0	2.02119	3
0	0	0	1	0	0	0	0	1	0	1	0	0	1	1	1	0	1	5250	0	0	1.8451	3
0	0	0	1	0	0	0	0	1	0	1	0	0	1	1	0	1	1	7000	0	0	1.9798	3
0	0	0	1	0	0	0	0	1	0	1	0	0	1	1	0	1	0	5250	0	1	3.44219	3
0	0	1	1	0	0	0	0	1	0	0	0	0	1	1	0	0	0	5250	0	1	2.20165	3
0	0	0	1	0	1	0	0	1	0	1	0	0	1	1	0	0	1	4200	0	1	2.32222	2
0	0	0	1	0	1	0	0	#NULL!	#NULL!	0	0	0	1	1	0	0	1	7000	0	1	1.24304	2
0	0	0	1	0	0	0	0	1	0	0	0	0	1	1	0	0	0	7000	0	1	2.8451	1
0	0	0	1	0	0	1	0	0	0	0	1	0	1	1	0	0	1	12250	0	1	4.28443	2
0	0	1	0	0	0	1	0	1	0	0	0	0	1	1	0	0	0	5600	0	1	3.17754	3
0	0	0	1	0	0	1	0	1	0	0	0	0	1	1	0	0	0	11666.7	0	1	1.54407	2
0	0	0	1	0	1	0	0	0	0	0	0	0	1	1	0	1	1	8400	0	1	3.38349	3
0	0	0	0	0	0	0	0	0	0	0	0	0	1	1	1	1	1	3500	0	1	2.02119	2
1	0	0	0	0	0	0	0	1	0	1	0	0	1	1	0	0	1	3500	0	1	1.24304	2
1	0	0	1	0	1	0	0	1	0	0	0	0	1	1	0	0	0	8400	0	1	1.24304	2
0	0	0	0	#NULL!	#NULL!	#NULL!	#NULL!	#NULL!	#NULL!	1	0	#NULL!	1	1	0	0	1	7000	0	1	1.24304	2
0	0	0	0	#NULL!	#NULL!	#NULL!	#NULL!	#NULL!	#NULL!	1	0	0	1	1	0	0	1	7000	0	1	1.24304	3
0	1	0	0	0	0	1	0	0	0	1	0	0	1	1	0	0	0	7000	0	1	1.24304	2
0	1	0	1	0	1	0	0	0	0	1	0	0	1	1	0	0	1	4000	0	1	1.24304	2
0	1	0	0	0	0	0	0	0	0	0	0	0	1	1	0	0	0	4666.67	0	1	1.8451	1
1	1	0	1	0	0	1	0	0	0	0	0	0	1	1	0	0	0	5803.57	0	1	1.24304	1
0	1	0	1	0	0	0	0	0	0	0	0	1	1	1	0	0	1	5833.33	0	1	1.24304	2
0	1	0	0	0	0	0	0	1	0	0	0	0	1	1	0	1	0	7535.71	0	1	1.24304	3
0	1	1	#NULL!	0	1	0	0	0	0	0	0	0	1	1	0	0	0	5833.33	0	0	3.99263	3
0	1	0	0	0	1	1	0	0	0	0	1	0	1	1	0	1	0	6187.5	0	1	1.24304	3
0	1	0	0	#NULL!	#NULL!	#NULL!	#NULL!	#NULL!	#NULL!	0	0	0	1	1	0	0	1	7000	0	1	1.24304	2
0	1	0	1	0	1	0	0	1	0	0	0	0	1	1	0	0	0	4000	0	1	1.24304	2
0	1	0	0	#NULL!	#NULL!	#NULL!	#NULL!	#NULL!	#NULL!	1	0	0	0	1	1	0	1	2800	0	1	1.24304	3
0	1	0	0	0	1	1	0	0	0	0	1	1	1	1	0	0	0	2000	0	1	3.23507	1
0	1	0	0	0	0	0	0	1	0	0	0	0	0	1	0	0	0	800	1	1	1.54407	3
1	1	0	0	0	0	0	0	0	1	1	0	1	1	1	0	0	1	3500	0	1	3.03543	3
0	1	0	0	0	0	0	0	1	0	1	0	0	0	1	0	0	1	#NULL!	1	1	3.13513	3
1	1	1	0	0	1	1	0	0	0	0	1	0	1	1	0	0	0	1500	0	1	1.24304	1
0	1	0	0	0	0	1	0	0	0	0	0	0	1	1	0	0	0	2833.33	0	1	2.32222	2
0	1	0	#NULL!	#NULL!	#NULL!	#NULL!	#NULL!	#NULL!	#NULL!	#NULL!	#NULL!	#NULL!	#NULL!	#NULL!	#NULL!	#NULL!	#NULL!	#NULL!	0	#NULL!	2.8451	2
0	1	0	0	0	0	1	0	0	0	0	0	0	1	1	0	0	0	47333.3	0	1	1.54407	3
1	1	0	0	0	0	0	0	0	0	1	0	0	1	1	0	0	0	687.5	0	1	3.66464	2
1	1	0	0	0	1	1	0	0	0	0	0	0	1	1	0	0	0	1071.43	0	1	1.24304	2
1	1	0	0	0	0	0	0	0	0	0	0	0	1	1	0	0	1	1666.67	0	1	3.40739	3
0	1	0	1	0	1	1	1	1	0	0	1	1	1	1	0	0	0	11666.7	0	1	1.24304	1
0	1	0	1	0	0	1	0	1	0	0	1	1	1	1	0	0	0	5187.5	0	1	1.24304	1
0	1	0	0	0	0	1	0	1	0	1	0	0	1	1	1	0	0	10000	0	1	3.74819	1
1	1	0	1	0	0	1	0	0	0	1	0	0	1	1	0	0	0	466.667	0	1	2.32222	1
0	1	0	1	0	0	1	0	0	1	1	0	0	1	1	0	1	1	13333.3	0	1	1.24304	1
0	1	1	1	0	0	1	0	0	0	0	0	0	1	1	0	1	0	8750	0	1	1.24304	2
1	1	0	0	0	1	1	0	0	0	0	0	0	1	1	0	0	0	5000	0	1	3.7796	1
0	1	1	1	0	0	1	0	1	0	1	0	0	1	1	0	1	0	7000	0	1	1.24304	1
1	1	1	0	0	0	0	0	0	1	1	0	0	1	1	0	1	0	7000	0	1	3.97543	3
1	1	1	1	0	0	1	0	0	0	0	0	0	1	1	0	0	1	7000	0	1	3.40577	3
1	1	0	1	0	0	1	0	0	0	1	0	0	1	1	0	0	1	7000	0	1	1.24304	2
0	1	0	1	0	0	0	0	0	0	1	0	0	1	1	0	0	0	5000	0	1	1.24304	2
1	1	0	0	0	0	1	0	0	0	0	0	0	1	1	0	0	1	7000	0	1	2.90062	1
1	1	0	0	0	0	0	0	0	0	0	0	0	1	1	0	1	1	7000	0	1	3.25164	2
1	1	0	1	0	0	0	0	0	0	1	0	0	1	0	0	1	1	2625	0	1	4.54407	3
1	1	0	0	0	0	1	0	1	0	1	0	0	1	1	0	1	1	2100	0	1	3.61995	1
0	1	1	1	0	0	1	0	0	0	0	0	0	1	1	0	1	1	8750	1	1	#NULL!	1
1	1	0	0	0	0	1	0	1	0	1	0	0	1	1	0	1	1	2800	0	1	2.34777	1
1	1	1	0	0	1	1	0	0	0	0	0	0	1	1	0	1	1	8000	1	1	3.23507	3
0	1	0	1	0	0	1	0	0	0	0	0	0	1	1	0	1	1	7000	0	1	3.366	2
1	1	0	1	0	0	1	0	0	0	0	0	0	1	1	0	1	0	6428.57	0	1	3.55575	2
1	1	0	1	0	0	0	0	0	0	1	0	0	1	1	0	0	1	6363.64	1	1	3.89184	2
1	1	1	1	0	0	0	0	0	0	1	0	0	1	1	0	1	0	#NULL!	0	0	2.14613	2
1	1	0	0	0	0	1	1	0	0	0	0	1	1	1	1	0	0	10000	0	1	1.24304	1
0	1	0	0	0	1	1	1	0	0	0	0	0	1	1	0	0	0	9166.67	0	0	1.54407	2
0	1	1	0	0	0	0	0	0	0	1	0	0	1	1	0	1	1	6666.67	1	1	1.24304	2
0	1	0	1	0	0	0	0	0	0	1	0	0	1	1	0	1	0	3750	0	1	4.06258	2
1	1	0	1	0	0	0	0	0	1	1	0	0	1	1	0	0	1	7500	0	1	4.19287	2
0	1	0	0	0	0	0	1	0	1	0	0	0	1	1	1	0	1	11666.7	0	1	2.65801	2
0	1	1	0	0	1	1	0	0	0	0	1	1	1	1	0	0	0	10250	0	1	1.24304	1
1	1	1	0	1	0	0	0	0	1	1	0	0	1	1	1	0	0	6666.67	0	1	4.34341	2
0	1	0	1	0	0	0	1	0	1	1	0	0	0	1	1	0	1	4285.71	0	1	3.7796	3
1	1	0	1	0	0	0	0	1	0	0	0	1	1	1	0	0	0	3750	0	1	3.58939	1
1	1	0	1	0	1	0	0	1	0	0	0	0	1	1	0	1	1	7000	0	1	1.24304	2
0	1	0	1	0	0	0	0	1	0	1	0	0	1	1	1	0	1	8333.33	0	1	1.24304	3
0	1	0	1	0	0	0	0	0	1	0	0	0	1	1	0	0	0	5000	0	1	4.22531	2
0	1	1	1	0	0	0	0	1	0	1	0	1	1	1	0	0	0	6000	0	1	3.39533	3
0	1	0	1	0	0	1	0	1	1	0	0	0	1	1	0	0	0	6000	0	1	1.24304	2
0	1	1	1	0	0	0	0	0	0	0	1	0	1	1	0	0	1	5000	0	1	3.50268	1
0	1	0	1	0	0	0	0	0	0	1	0	#NULL!	1	1	0	0	1	11666.7	0	1	2.02119	#NULL!
0	1	1	1	0	0	0	0	0	0	1	0	0	1	0	0	0	1	6250	1	1	1.24304	2
0	1	0	1	0	0	0	0	0	0	0	0	1	0	1	0	0	1	2333.33	0	1	3.75795	3
0	1	1	1	0	0	0	0	1	0	1	0	0	1	1	0	0	1	10000	0	1	3.84073	3
0	1	0	0	0	0	1	0	0	0	1	0	0	1	1	0	0	1	11666.7	0	1	2.9798	3
1	1	1	1	0	0	1	0	1	0	1	0	0	1	1	0	1	1	8000	0	1	4.48359	1
0	1	1	0	0	0	1	0	0	0	1	0	1	1	1	0	0	0	5166.67	0	1	2.94983	1
1	1	0	1	0	1	1	0	0	0	0	1	0	1	1	0	1	0	20833.3	0	1	1.9798	1
0	1	0	1	0	1	1	0	0	0	0	1	0	1	1	0	1	0	10625	0	1	1.24304	1
0	1	0	0	0	0	0	0	0	1	0	0	1	1	1	0	0	1	70000	0	0	1.54407	3
0	1	1	1	0	1	1	0	0	1	1	1	1	1	1	0	0	0	2100	0	1	3.64098	1
0	1	1	1	0	1	1	0	0	0	0	1	0	1	1	0	0	0	10535.7	0	1	1.24304	2
0	1	0	1	0	0	0	0	0	1	1	0	1	1	1	0	0	1	8750	1	1	3.28443	1
0	1	0	1	0	1	1	1	0	0	0	0	0	1	1	0	1	0	7000	1	1	2.02119	3
1	1	0	1	0	1	1	0	0	0	0	1	1	1	1	0	0	0	8791.67	0	1	1.8451	3
0	1	0	0	0	1	1	0	0	1	1	0	0	1	1	0	0	0	5416.67	0	1	1.24304	2
0	1	1	1	1	0	0	0	0	1	1	0	1	1	1	0	0	1	5000	0	0	4.20208	1
0	1	1	1	0	0	0	0	0	1	1	0	0	1	1	0	0	1	5500	0	0	1.24304	3
0	1	0	0	0	1	1	0	0	0	1	0	0	1	1	0	0	0	323	0	1	2.02119	3
0	1	0	0	0	0	0	1	0	1	0	0	0	1	1	0	0	0	8333.33	0	1	1.24304	1
0	1	0	1	0	0	1	0	0	0	1	0	1	1	1	0	0	0	5454.55	0	1	3.83713	2
0	1	0	1	0	0	0	1	1	0	0	0	0	0	1	0	1	0	6000	0	1	2.20165	1
1	1	1	1	0	0	0	0	0	0	1	0	1	1	1	0	0	1	6428.57	0	0	1.54407	2
0	1	1	0	0	0	0	0	0	0	1	0	1	1	1	0	0	1	8000	0	0	1.24304	3
0	1	1	0	0	0	0	0	0	1	1	0	1	1	1	0	1	1	7000	0	1	2.54407	3
0	1	1	#NULL!	0	#NULL!	#NULL!	#NULL!	#NULL!	#NULL!	1	0	0	1	1	0	1	1	6000	0	1	2.40577	1
0	1	0	#NULL!	0	#NULL!	#NULL!	#NULL!	#NULL!	#NULL!	1	0	1	1	1	1	1	1	5833.33	0	1	3.5611	3
0	1	1	0	0	1	1	1	0	0	0	0	0	1	1	0	0	0	11562.5	0	1	2.78143	#NULL!
0	1	0	0	0	1	1	0	0	0	0	0	0	1	1	0	1	0	8750	0	1	2.24304	3
0	1	0	0	0	1	1	0	0	0	0	0	1	1	1	0	0	0	5958.33	0	1	3.14613	3
0	1	0	0	0	0	1	0	0	0	0	1	0	1	1	0	0	0	17875	0	1	2.32222	2
0	0	1	0	0	1	1	0	1	0	1	#NULL!	#NULL!	#NULL!	#NULL!	#NULL!	#NULL!	0	8571.43	0	#NULL!	2.54407	#NULL!
1	0	0	0	0	1	1	0	1	0	0	0	0	1	1	0	0	1	8750	0	1	2.82282	3
0	0	0	1	0	0	1	0	0	0	1	0	0	1	1	0	1	1	6428.57	0	1	2.02119	3
0	0	0	1	0	0	0	0	0	0	0	0	0	1	1	0	0	1	10000	0	1	1.24304	3
0	0	0	1	0	0	0	0	0	0	0	0	0	1	1	0	0	1	8750	0	1	3.67586	2
0	0	0	1	0	1	0	1	1	0	0	0	0	1	1	1	0	1	7000	0	1	2.61662	3
1	0	0	1	0	0	0	1	0	0	0	0	0	1	0	0	0	1	6250	0	1	1.24304	3
0	0	1	0	0	0	0	0	1	1	1	0	0	1	1	0	0	1	11666.7	0	1	2.02119	3
1	0	0	1	0	0	0	0	0	1	1	0	0	1	1	0	0	0	5714.29	0	1	3.07555	1
1	0	0	1	0	0	0	0	0	1	1	0	0	1	0	0	0	0	5714.29	0	1	2.8451	2
0	0	0	1	0	1	0	0	1	0	1	0	1	1	1	1	0	1	11666.7	0	0	1.24304	2
0	0	1	1	0	0	0	0	0	1	1	0	1	1	1	0	0	1	4285.71	0	0	1.24304	3
0	0	0	0	0	0	0	0	0	1	1	0	0	1	1	0	0	1	10500	0	0	1.24304	3
0	0	1	1	0	1	0	0	0	1	1	0	0	1	0	0	0	1	3333.33	0	0	1.24304	3
0	0	1	1	0	1	0	0	1	0	1	0	0	1	1	0	0	1	8400	0	0	1.24304	3
0	0	1	1	0	1	0	0	1	1	1	0	0	1	1	0	0	1	6000	0	1	1.54407	1
0	0	0	1	0	1	1	0	1	0	1	0	0	1	1	0	1	1	6666.67	0	1	2.24304	2
0	0	0	1	0	0	0	0	0	0	1	0	0	1	1	0	1	0	7000	0	1	2.32222	3
0	0	1	1	0	0	0	0	1	0	1	0	1	1	1	0	0	1	2625	0	1	1.24304	3
0	0	0	1	0	0	1	1	1	0	1	1	0	1	0	0	0	0	12812.5	0	1	1.8451	2
0	0	0	1	0	1	0	0	1	1	0	1	0	1	1	0	0	0	3500	0	1	2.62325	1
0	0	0	1	0	1	0	0	1	0	0	0	0	1	1	0	1	1	5000	0	1	3.66404	2
0	0	0	0	0	0	0	0	0	1	1	0	0	1	1	0	0	1	10500	0	0	2.20165	3
0	0	0	#NULL!	0	#NULL!	#NULL!	#NULL!	#NULL!	#NULL!	1	0	0	1	1	1	1	1	9000	0	0	1.24304	2
0	0	0	1	0	0	0	0	0	1	1	0	1	1	1	0	0	1	5250	1	0	1.24304	1
0	0	0	1	0	0	0	0	0	1	1	0	0	1	1	0	0	1	7000	0	0	1.24304	3
0	0	0	1	0	0	0	0	1	1	1	0	#NULL!	1	0	0	0	1	2333.33	1	0	1.80371	2
0	0	0	1	0	0	0	0	0	1	0	0	0	1	0	0	0	1	5000	0	0	2.54407	1
0	0	0	1	0	0	0	0	1	0	1	0	#NULL!	1	1	0	0	1	1750	0	0	1.24304	3
0	0	0	1	0	1	1	0	1	0	1	1	1	1	0	0	0	0	5000	0	1	2.61662	2
1	0	1	1	0	1	1	0	0	0	0	0	0	1	1	0	0	0	8000	0	1	2.02119	3
0	0	0	1	0	0	1	0	0	0	1	0	0	1	1	0	0	0	3333.33	0	1	1.24304	3
0	0	1	0	0	0	0	0	0	1	1	0	1	1	1	0	0	1	7500	0	1	1.24304	2
0	0	0	1	0	0	0	1	0	1	1	1	1	1	1	0	0	1	7000	0	1	1.24304	1
0	0	0	#NULL!	0	#NULL!	#NULL!	#NULL!	#NULL!	#NULL!	1	1	0	1	1	0	0	1	4666.67	1	1	1.24304	3
0	0	1	0	0	1	1	0	0	0	1	0	0	1	1	0	0	0	7142.86	0	1	3.07088	2
0	0	1	0	0	0	0	0	0	0	0	0	0	1	1	0	0	0	11666.7	0	1	1.24304	3
1	0	0	1	0	0	0	0	0	1	0	0	0	1	1	0	0	0	10500	0	1	2.54407	3
0	0	1	0	0	0	1	0	1	0	0	0	0	1	1	0	1	0	11666.7	0	1	1.54407	2
1	0	0	1	1	0	0	0	0	0	0	0	0	1	1	0	0	0	5000	0	0	2.38917	3
0	0	0	1	0	0	0	0	1	0	1	0	0	1	1	0	1	0	8750	0	0	1.54407	1
0	0	0	0	0	0	0	0	1	0	1	0	0	1	1	0	1	1	4375	0	0	1.54407	3
0	0	0	0	#NULL!	#NULL!	#NULL!	#NULL!	#NULL!	#NULL!	1	1	0	1	1	0	1	0	6666.67	0	1	1.8451	1
1	1	0	1	0	1	1	1	0	0	0	0	0	1	1	0	0	0	9333.33	1	1	1.24304	3
0	1	0	0	0	0	0	1	1	0	0	0	0	1	1	0	0	0	9583.33	0	1	1.54407	1
0	1	0	0	0	0	1	0	0	1	1	0	0	1	1	0	0	0	7166.67	0	1	2.74819	2
0	1	1	1	0	0	0	0	1	0	1	0	0	1	1	0	0	0	5250	0	0	1.24304	2
0	1	1	1	0	1	1	1	1	0	0	0	0	1	1	0	0	0	5156.25	0	0	1.24304	3
0	1	1	0	0	1	1	1	0	0	0	0	0	1	1	0	0	0	12000	0	0	1.24304	3
0	1	0	0	0	0	0	0	1	0	0	0	0	1	1	0	0	1	9333.33	0	0	2.54407	3
0	1	0	0	0	0	0	0	0	0	1	0	0	1	1	0	0	1	14000	0	0	1.24304	3
0	1	0	1	0	0	1	1	1	0	1	0	0	1	1	0	0	0	7187.5	0	0	2.82489	3
0	1	1	0	0	0	1	1	0	0	1	0	#NULL!	1	1	0	0	0	8750	0	1	2.14613	2
0	1	0	0	0	1	1	0	0	1	0	0	1	1	1	1	0	0	7937.5	0	1	3.22695	2
1	1	0	1	0	0	0	0	1	0	1	0	1	1	1	0	1	0	5833.33	1	1	3.29994	1
1	1	1	1	0	0	1	0	0	1	1	1	0	1	1	0	1	0	7500	0	1	3.77914	1
0	1	1	0	0	0	1	0	1	0	1	0	1	1	1	0	1	1	16666.7	1	1	3.72539	1
1	1	1	0	0	0	1	0	1	0	0	0	1	1	1	0	0	1	3500	0	1	3.18752	2
1	1	1	0	0	0	1	0	0	0	1	0	0	1	1	0	0	1	3000	0	1	1.54407	1
0	1	0	0	0	0	1	1	1	1	0	0	0	0	1	0	0	0	6562.5	0	1	3.64444	1
1	1	0	1	0	0	0	0	1	1	0	0	#NULL!	1	1	1	0	1	8333.33	0	1	3.29226	1
0	1	0	0	0	0	0	0	0	0	0	0	#NULL!	1	1	0	0	0	6250	0	1	3.25164	3
1	1	1	0	0	1	1	1	0	0	0	0	1	1	0	0	0	0	10500	0	1	3.96954	3
0	1	1	1	#NULL!	#NULL!	#NULL!	#NULL!	#NULL!	#NULL!	0	1	1	1	0	0	1	0	12500	1	1	1.54407	1
1	1	0	0	0	0	0	0	0	0	1	0	0	1	1	0	0	0	8750	0	1	3.24304	1
1	1	0	0	0	0	1	0	0	0	0	0	1	1	1	1	0	0	7093.75	0	1	3.62325	3
1	1	0	0	0	0	1	0	0	1	0	0	0	1	1	0	0	0	12500	0	1	1.24304	1
1	1	0	1	0	1	1	0	0	0	0	1	1	1	1	0	0	0	10555.6	0	1	1.24304	2
0	1	1	0	0	1	1	0	0	1	0	0	0	1	1	0	1	0	7500	0	1	3.95752	3
0	1	0	0	0	0	1	0	0	1	0	0	0	1	1	0	0	0	22250	0	1	3.98555	3
0	1	0	1	0	0	0	0	0	0	1	0	0	1	1	0	0	0	3846.15	0	1	3.19728	1
1	1	0	1	0	0	0	0	0	0	0	0	#NULL!	1	1	0	0	1	2625	0	1	1.24304	1
1	1	0	0	0	1	1	0	0	0	0	0	0	1	1	0	0	0	7250	0	1	1.24304	1
1	1	0	1	0	0	0	0	0	0	0	0	0	1	1	0	0	0	5450	0	1	2.40577	1
0	1	1	0	0	0	1	0	0	1	1	0	0	1	1	1	1	0	7000	0	1	1.8451	2
1	1	0	1	0	0	0	0	1	1	1	0	1	1	1	0	0	0	5714.29	0	1	2.14613	3
1	1	0	0	0	0	1	0	0	1	1	0	1	1	1	1	0	0	40000	0	1	2.45692	3
0	1	0	1	0	0	0	0	0	0	1	0	1	1	1	0	0	0	2625	0	1	1.54407	3
1	1	0	1	0	0	1	0	0	0	1	0	0	1	1	0	1	0	4000	0	0	3.71433	2
0	1	0	0	0	0	0	0	1	0	1	0	0	1	1	0	1	1	3571.43	0	1	2.8451	1
0	1	0	0	0	0	1	0	0	0	1	0	0	0	1	0	1	0	9500	0	1	2.02119	1
0	1	0	0	0	0	1	0	0	0	0	0	0	1	1	0	1	0	7593.75	0	1	1.24304	1
0	1	0	1	0	0	0	0	0	1	1	0	0	1	1	0	0	1	5000	0	1	1.24304	3
0	1	1	1	0	0	0	0	0	0	0	0	0	1	1	0	0	1	12500	0	1	3.14613	3
0	1	0	0	0	0	0	0	0	0	0	0	0	1	0	0	0	1	1875	0	1	4.00099	3
1	1	0	1	0	1	1	0	0	0	0	0	0	1	1	0	1	0	6923.08	0	1	3.44716	2
1	1	0	0	0	0	0	0	0	0	0	0	0	1	1	0	0	0	8888.89	0	1	3.79048	1
1	1	0	1	0	1	1	1	0	0	1	1	0	1	1	0	0	0	7428.57	0	1	1.24304	1
1	1	0	0	0	0	0	0	0	0	0	0	0	1	1	0	1	0	9950	0	1	2.44716	2
1	1	0	1	0	0	0	0	0	1	1	0	0	0	1	1	0	0	2857.14	0	1	2.80371	3
1	1	0	1	0	0	1	0	0	0	1	0	1	1	1	0	0	1	16250	0	1	3.59959	3
1	1	0	0	0	1	1	0	0	0	0	1	0	1	1	0	0	0	12500	0	1	2.6488	2
0	1	0	0	0	0	1	0	1	0	0	0	0	1	1	0	1	0	15000	0	1	3.79271	1
1	1	0	0	0	1	1	1	0	0	0	0	1	1	0	0	1	0	7550	0	1	3.05898	1
0	1	0	0	0	1	1	0	0	1	1	0	1	1	1	0	0	0	6000	0	1	3.73159	1
0	1	1	0	0	0	0	0	0	0	1	0	1	1	1	0	0	0	10312.5	0	1	2.24304	3
1	1	1	1	0	0	0	0	0	1	1	0	0	0	0	0	0	0	7777.78	0	1	4.38292	1
0	1	1	0	0	1	1	0	0	0	0	0	0	1	1	0	1	0	7083.33	0	1	3.35025	3
0	1	1	0	0	1	1	1	0	0	0	0	0	1	1	1	1	0	11916.7	0	1	4.4417	1
1	1	0	1	0	0	0	0	1	0	1	1	1	1	1	0	0	1	5062.5	0	1	3.95752	#NULL!
0	1	0	1	0	0	1	0	0	0	1	0	0	0	1	0	1	0	5000	0	1	1.24304	2
1	1	1	1	0	0	0	0	0	0	1	0	0	1	1	0	0	0	15000	0	1	3.74819	2
0	1	1	0	0	0	1	0	0	0	1	0	0	1	1	0	0	0	10000	0	1	2.79934	2
1	1	0	0	0	1	1	0	0	0	0	1	0	1	1	0	1	0	5000	0	1	3.30886	1
0	1	1	0	0	0	1	0	0	0	0	0	1	1	1	0	1	0	6916.67	0	1	2.50268	3
0	1	0	1	0	0	0	0	1	0	1	0	0	1	1	1	0	1	3888.89	0	1	1.24304	2
0	1	1	1	0	0	0	0	1	0	1	0	0	1	1	0	0	1	2500	0	1	3.99263	1
0	1	0	0	0	0	0	0	0	1	1	0	0	1	1	0	1	1	5714.29	0	1	3.366	1
0	1	0	0	0	0	1	0	1	0	0	1	0	1	1	0	1	0	10357.1	0	1	2.02119	3
0	1	0	1	0	0	0	0	0	0	1	0	0	1	1	0	0	1	5000	0	1	1.54407	2
0	1	0	1	0	0	1	0	0	0	0	1	0	1	1	0	0	1	3181.82	0	1	3.15589	2
0	1	0	0	0	0	0	0	1	0	1	0	1	1	1	0	1	1	10000	0	1	1.24304	3
0	1	0	0	0	0	1	0	0	0	1	0	0	1	1	0	0	0	8750	0	1	2.80371	2
0	1	1	0	0	1	1	0	1	0	1	1	0	1	1	0	0	0	10250	0	1	3.32222	2
1	1	0	1	0	0	0	0	0	0	0	0	0	1	1	0	1	0	5125	0	1	2.34777	1
0	1	0	1	0	0	0	0	0	0	1	0	0	1	1	0	0	1	5000	0	1	2.14613	2
0	1	0	1	0	0	0	0	1	0	1	0	0	1	1	0	1	1	5000	0	1	2.44716	3
0	1	0	1	0	0	1	0	1	0	0	0	0	1	1	0	1	1	10000	0	1	1.24304	1
0	1	0	1	0	0	0	0	0	1	1	0	0	1	1	0	1	1	13333.3	0	1	1.24304	2
0	1	1	0	0	0	0	0	0	1	1	0	0	1	1	0	0	1	5000	1	1	2.88649	1
0	1	1	0	0	0	1	0	1	1	0	0	0	1	1	0	1	0	10166.7	0	1	1.24304	1
0	1	0	0	0	0	1	0	1	0	1	0	0	1	1	0	0	0	6250	0	1	2.24304	3
0	1	1	1	0	1	1	1	0	0	0	0	0	1	1	0	0	0	8541.67	0	1	1.54407	2
0	1	1	0	0	0	0	0	0	0	0	1	0	1	1	0	1	0	16666.7	0	1	3.29507	3
0	1	1	0	0	0	1	0	0	0	1	0	0	1	1	0	1	0	13583.3	1	1	3.25855	1
0	1	0	0	0	0	0	0	0	0	1	0	0	1	1	0	1	1	2500	0	1	3.81443	3
0	1	0	1	0	0	1	0	0	0	0	0	0	1	1	0	1	0	5178.57	0	1	2.61662	1
0	1	0	1	0	0	0	0	0	0	1	0	0	1	1	0	1	0	5000	1	1	3.8451	2
1	1	0	1	0	0	0	0	0	1	1	0	0	1	1	0	1	1	12500	0	1	1.8451	1
0	1	1	1	0	0	1	0	0	1	0	0	0	1	1	1	1	1	5821.43	0	1	4.20208	3
0	1	0	1	0	0	0	0	0	1	0	1	0	1	1	0	0	1	7777.78	0	1	3.49831	3
0	1	0	1	0	0	0	0	0	0	0	0	0	1	1	0	1	0	8333.33	0	1	3.77452	2
0	1	1	0	0	0	0	0	0	0	1	0	0	1	1	0	1	1	6250	0	1	1.8451	2
0	0	0	1	0	0	1	0	1	0	0	1	0	1	0	0	0	0	5714.29	0	1	3.38349	1
0	0	0	0	0	1	0	0	0	0	1	0	0	1	1	0	0	1	3000	0	0	3.02119	2
0	0	0	1	0	1	0	0	0	1	1	0	0	1	1	0	0	1	1666.67	0	0	1.24304	1
0	0	0	0	0	1	0	0	1	0	1	0	1	1	1	0	0	1	7500	0	0	2.10474	3
0	0	0	0	0	1	0	0	1	0	1	0	1	1	1	0	0	0	8750	0	1	3.38917	1
0	0	0	1	0	0	0	0	0	1	0	0	0	1	1	0	0	1	7000	0	0	1.24304	2
0	0	0	1	0	0	0	0	1	0	1	0	1	1	1	0	1	1	2500	0	0	1.8451	3
0	0	1	1	0	0	0	0	0	1	1	0	0	1	1	0	0	1	5250	0	0	1.24304	2
0	0	1	1	0	1	0	0	0	0	0	0	0	1	1	0	1	1	8750	0	0	1.24304	3
1	0	1	1	0	1	0	0	0	0	1	0	0	1	1	0	0	1	7000	0	1	2.10474	1
0	0	0	1	0	0	0	0	0	0	1	0	0	1	1	0	0	1	6666.67	0	1	1.24304	3
0	0	0	1	0	1	0	0	0	0	1	0	0	1	1	0	0	1	3500	0	1	1.24304	2
0	0	1	1	#NULL!	#NULL!	#NULL!	#NULL!	#NULL!	#NULL!	1	0	0	1	1	1	0	0	8750	0	1	1.24304	2
0	0	1	1	0	0	1	0	0	0	1	1	0	1	1	0	0	0	2333.33	0	1	1.24304	2
0	0	0	1	0	1	0	0	1	0	0	0	0	1	1	0	0	1	6250	0	1	2.49831	3
0	0	0	0	0	1	0	0	0	0	1	0	0	1	1	0	0	1	3500	0	0	2.49831	1
0	0	0	1	0	0	0	0	1	0	0	0	0	1	0	0	0	0	3500	0	0	2.02119	1
0	0	1	1	0	1	0	0	0	1	1	0	1	1	1	0	0	1	1833.33	0	0	2.49831	3
0	0	0	0	0	0	0	0	0	0	0	0	0	1	0	0	0	1	8333.33	0	0	1.24304	2
0	0	0	1	0	1	0	0	0	0	1	0	0	1	1	0	0	1	11666.7	0	0	1.24304	2
0	0	0	1	#NULL!	#NULL!	#NULL!	#NULL!	#NULL!	#NULL!	1	0	0	1	1	0	1	1	2857.14	0	0	1.24304	3
0	0	0	1	0	0	0	0	0	1	1	0	0	1	1	0	1	1	5000	0	0	2.93404	2
0	0	1	#NULL!	0	#NULL!	#NULL!	#NULL!	#NULL!	#NULL!	1	0	0	0	1	0	1	1	8750	0	0	1.24304	3
0	0	0	#NULL!	0	#NULL!	#NULL!	#NULL!	#NULL!	#NULL!	0	0	0	1	1	0	0	1	2333.33	0	0	3.21617	2
0	0	1	0	0	0	0	0	0	1	1	0	0	1	1	0	0	1	5000	0	1	1.24304	3
0	0	0	0	0	0	0	0	0	0	0	0	0	1	1	0	0	0	7000	0	1	1.24304	2
0	0	0	1	0	0	0	0	1	0	0	1	0	1	1	0	0	1	5000	0	1	1.24304	2
0	0	1	0	0	0	0	0	0	1	0	0	0	1	1	0	0	0	5000	0	1	#NULL!	3
0	0	0	0	0	0	0	0	1	0	1	0	0	1	1	0	0	1	5000	0	0	2.49831	2
0	0	0	1	0	0	0	0	1	0	1	1	0	1	1	0	1	1	6250	0	1	2.74819	2
0	0	1	1	0	0	1	0	0	0	1	1	0	1	1	0	0	1	4375	0	1	3.34152	3
0	0	0	1	0	0	0	0	0	0	1	0	0	1	1	0	0	1	8750	0	1	2.02119	3
1	0	0	1	0	0	0	0	0	0	0	0	0	1	1	0	0	0	4200	0	1	2.54407	1
0	0	0	1	0	1	0	0	0	0	0	1	0	1	1	0	0	0	10000	0	1	1.24304	2
0	0	0	1	0	1	1	0	1	0	0	0	1	1	1	0	0	1	4000	0	0	4.14613	3
0	0	1	#NULL!	0	#NULL!	#NULL!	#NULL!	#NULL!	#NULL!	1	0	0	1	1	0	1	1	11666.7	0	0	2.02119	3
0	0	0	1	0	0	1	0	0	0	1	1	0	1	1	0	1	0	11250	0	1	3.04674	2
0	0	0	0	0	0	0	0	0	0	1	1	1	1	1	0	0	1	4375	1	1	1.54407	2
0	0	1	0	0	0	0	0	0	0	1	1	0	1	1	1	1	0	8333.33	0	1	1.24304	3
0	0	0	0	0	0	0	0	0	0	0	1	0	1	1	0	0	0	10000	0	1	2.32222	2
0	0	0	0	0	1	0	0	0	0	1	1	0	1	1	0	0	1	3150	0	1	2.32222	2
0	0	0	1	0	0	0	0	0	0	0	0	1	1	1	0	0	0	6666.67	0	1	1.24304	1
0	0	0	1	0	1	0	0	0	0	0	0	1	1	1	0	0	0	6000	0	1	1.24304	1
0	0	1	1	0	0	0	0	1	0	1	0	0	1	1	0	0	1	7000	0	1	3.63621	3
0	0	0	1	0	0	0	0	0	0	1	1	0	1	1	0	1	0	7500	0	1	2.24304	2
1	0	0	1	0	0	1	0	0	0	0	0	0	1	1	0	0	0	7291.67	0	1	3.74072	3
1	0	1	0	0	0	0	0	1	0	0	0	0	1	1	0	1	0	7500	0	1	3.04674	3
0	0	0	1	#NULL!	#NULL!	#NULL!	#NULL!	#NULL!	#NULL!	1	0	0	1	1	0	1	1	5000	0	1	2.02119	3
1	0	0	1	0	0	0	0	0	0	0	0	0	1	1	0	1	0	5972.22	0	1	1.24304	3
0	0	0	0	0	1	1	0	0	0	1	0	0	1	1	0	1	0	6666.67	0	1	2.02119	3
0	0	1	1	0	0	0	0	0	1	1	0	0	1	1	0	0	1	2500	0	1	1.24304	1
1	0	0	1	0	0	0	0	0	1	0	0	0	1	1	0	0	1	3125	0	1	2.94201	2
1	0	1	1	0	1	0	0	0	0	1	0	0	1	1	0	1	0	2000	0	1	2.02119	3
0	0	0	0	0	0	0	0	0	1	1	0	1	1	1	0	1	1	11666.7	0	1	1.24304	3
1	0	0	1	0	0	0	0	0	0	0	0	0	1	1	0	1	0	4375	0	1	1.24304	1
0	1	1	0	0	1	1	0	0	0	0	0	1	1	1	0	0	0	7500	0	1	4.26834	3
1	1	1	1	0	0	0	0	0	0	1	0	0	1	1	0	0	0	10312.5	0	1	1.24304	2
0	1	0	1	0	0	1	0	0	0	0	0	0	1	1	0	0	0	5000	0	1	1.24304	2
1	1	0	1	0	1	0	0	0	0	0	0	0	1	1	0	0	1	5000	0	1	1.54407	1
1	1	1	0	0	1	1	0	0	0	1	0	0	1	1	0	1	0	11916.7	0	0	1.24304	3
0	1	0	1	0	1	1	1	0	0	0	0	0	1	1	0	1	0	5455.27	0	1	1.54407	1
0	1	0	1	0	1	1	0	0	0	1	0	0	1	1	0	0	0	8000	0	0	1.24304	2
0	1	0	1	0	0	1	0	0	0	0	0	0	1	1	0	0	0	3214.29	0	0	1.24304	2
0	1	0	1	0	1	1	0	0	0	0	0	0	1	1	0	0	0	10285.7	0	0	1.24304	2
0	1	1	1	0	0	0	0	0	0	1	0	0	1	1	0	0	1	5000	0	1	1.24304	3
0	1	1	0	0	0	0	0	0	0	1	0	0	1	1	0	0	1	5833.33	0	1	2.24304	2
0	1	0	1	0	0	0	0	0	1	1	0	1	1	1	0	1	1	3333.33	0	1	4.44716	2
1	1	0	1	0	0	0	0	0	1	1	0	1	1	1	0	0	1	8750	0	1	4.22531	2
0	1	1	1	0	0	0	0	0	1	1	0	0	1	1	0	1	1	#NULL!	0	1	2.38917	3
1	1	0	1	0	1	1	0	0	0	0	0	1	1	1	0	0	0	13125	0	1	1.54407	1
1	1	0	1	0	1	1	0	0	0	0	1	1	1	1	0	0	0	4821.43	0	1	2.8451	1
0	1	1	1	0	1	1	1	0	0	1	0	0	0	1	1	1	0	14083.3	1	1	3.64569	3
0	1	1	1	0	1	1	0	0	0	0	0	0	1	1	0	0	0	625	1	1	4.15973	3
0	1	0	0	0	1	1	0	0	0	1	0	1	1	0	0	0	0	16666.7	1	1	1.80371	1
0	1	0	1	0	0	1	0	0	0	1	0	0	1	1	0	0	0	4687.5	0	1	1.24304	2
1	1	1	0	0	0	1	0	0	0	0	0	1	1	1	0	0	0	12562.5	0	1	3.82282	2
0	1	0	1	0	1	1	0	0	1	0	0	0	1	1	0	1	0	5000	0	1	2.24304	2
0	1	0	1	0	1	1	0	0	0	0	1	0	1	0	0	0	0	6333.33	0	1	3.80803	2
0	1	0	1	0	0	0	0	0	1	0	0	0	1	1	0	1	1	8333.33	0	1	3.19287	2
0	1	0	0	0	1	1	1	0	0	1	0	0	1	1	1	1	0	10250	0	1	3.31559	2
1	1	0	0	0	0	0	0	1	1	1	0	0	1	1	0	0	1	6000	1	1	3.76938	1
0	1	0	1	0	0	0	0	0	1	1	0	0	1	1	0	0	0	3333.33	0	1	1.54407	3
0	1	1	0	0	0	0	0	1	1	0	0	1	1	1	1	0	0	5600	0	1	3.8451	3
0	1	0	0	0	0	0	0	1	1	1	0	0	1	1	0	0	0	9458.33	0	1	3.77914	3
1	1	0	1	0	0	0	0	0	1	0	0	0	1	1	1	0	1	3750	0	1	2.86629	3
1	1	0	1	0	0	0	0	0	1	1	0	1	1	1	0	0	0	4750	0	1	2.78143	2
0	1	0	0	0	0	0	0	0	1	0	0	1	1	1	1	0	0	9333.33	0	1	3.00783	1
0	1	0	1	1	1	1	1	0	0	0	0	1	1	1	0	0	0	9375	0	1	2.75795	1
1	1	1	1	0	1	1	0	0	0	0	1	1	1	1	0	0	0	13500	0	1	3.29994	2
0	1	0	1	0	1	1	0	0	0	1	0	1	1	1	0	0	0	5795.45	0	0	2.8451	2
1	1	0	1	0	0	1	0	0	1	1	0	#NULL!	1	1	0	0	0	5500	0	1	3.54839	3
0	1	0	1	0	0	0	0	0	0	0	0	0	1	1	0	1	1	7500	0	1	1.8451	1
1	1	0	0	0	0	1	0	0	0	0	0	0	1	1	0	1	0	4600	0	1	2.92428	1
0	1	0	1	0	0	1	0	0	0	1	0	0	1	1	1	0	0	4285.71	0	1	1.24304	2
0	1	0	1	0	0	0	0	0	1	1	0	1	1	1	1	0	1	4000	1	1	3.66464	2
0	1	0	0	0	0	0	0	0	0	1	0	0	1	1	0	0	0	5600	0	1	2.88649	3
1	1	0	1	0	1	1	0	0	0	0	0	0	1	0	0	0	0	4175	0	1	3.22531	2
1	1	0	1	0	0	0	0	1	0	1	0	0	1	1	0	1	1	2333.33	0	1	2.54407	1
1	1	0	1	0	0	1	0	1	0	1	0	0	1	0	0	0	0	1500	0	1	1.24304	1
0	1	0	1	0	1	1	1	0	0	0	1	1	1	1	0	0	0	10000	0	1	2.58546	2
1	1	0	1	0	0	0	0	0	1	1	0	0	1	0	0	1	0	3500	0	1	1.8451	2
0	1	0	1	0	0	0	0	0	0	1	0	0	1	1	0	0	0	5333.33	0	1	2.44716	2
0	1	1	1	0	0	0	0	0	1	1	0	0	1	1	1	0	1	7142.86	0	1	3.78143	3
1	1	0	0	0	0	0	0	0	1	0	0	0	1	1	0	0	0	7000	1	1	1.54407	2
0	1	1	1	#NULL!	#NULL!	#NULL!	#NULL!	#NULL!	#NULL!	0	1	0	1	1	0	0	0	11875	1	1	1.54407	2
1	1	0	0	0	0	1	0	0	0	0	1	1	1	1	0	0	0	12916.7	1	1	1.24304	1
0	1	0	1	0	0	0	0	0	0	1	0	1	1	1	1	1	1	12500	0	1	2.54407	1
0	1	1	0	0	0	0	0	0	0	1	0	0	1	0	0	0	1	600	0	1	3.26834	3
0	1	0	1	0	0	0	0	0	1	0	0	0	1	1	0	0	1	6.66667	0	1	1.24304	2
0	1	0	1	0	0	0	0	0	0	1	0	0	1	1	0	1	0	625	0	1	4.06497	1
0	1	0	0	0	0	1	0	1	1	0	0	1	1	1	0	1	0	7000	0	1	1.24304	3
0	1	1	0	0	0	0	0	0	0	1	0	0	1	1	0	0	0	7500	1	1	4.08587	3
0	1	1	1	0	0	1	0	0	1	0	0	1	1	1	0	0	0	7142.86	0	1	3.33518	2
0	1	0	1	0	0	1	0	1	0	1	0	0	1	1	1	0	0	10000	1	1	1.8451	3
0	1	1	1	1	0	0	0	0	0	1	0	0	1	1	0	0	1	7000	0	1	3.30202	2
0	1	1	1	0	0	0	0	0	0	1	0	0	1	1	1	0	1	7000	0	1	3.77452	2
0	1	0	0	1	0	1	0	1	1	1	0	1	1	1	0	0	0	6666.67	0	1	2.32222	2
1	1	0	0	0	0	0	0	0	0	1	0	0	1	1	0	0	1	7000	1	1	2.9058	3
0	1	0	1	1	0	0	0	0	1	1	0	1	1	1	0	0	1	3000	1	1	1.24304	3
0	1	1	0	0	0	0	0	0	0	0	0	0	1	1	0	0	0	8750	0	1	2.28083	2
1	1	0	1	0	0	0	0	0	1	1	0	0	1	1	1	0	1	2800	1	1	2.62325	3
0	1	1	#NULL!	0	#NULL!	#NULL!	#NULL!	#NULL!	#NULL!	1	1	0	0	0	0	0	0	3333.33	0	1	3.75795	2
0	1	1	0	0	0	0	0	1	0	1	0	0	1	1	0	1	0	3000	0	1	3.30886	1
0	1	0	0	0	0	1	0	0	1	0	0	0	1	1	0	1	0	5250	0	1	2.65801	1
1	1	0	0	0	0	0	0	0	0	1	0	0	1	1	0	0	0	8750	0	1	2.28083	3
0	1	1	0	0	0	1	0	0	1	0	0	0	1	1	0	0	0	4166.67	0	1	3.14613	2
0	1	0	1	0	1	1	0	0	1	1	0	0	1	1	0	0	0	6250	0	1	3.28801	2
1	1	0	1	1	1	1	0	1	0	0	1	1	1	1	0	0	0	10000	0	1	3.25086	1
0	1	1	0	0	0	1	0	0	1	0	0	0	1	1	0	0	0	5000	1	1	4.03923	3
0	1	0	1	0	0	1	0	0	0	0	0	0	1	1	0	0	0	10666.7	0	1	2.94983	1
1	1	0	1	0	1	1	0	0	0	0	0	1	1	1	0	0	0	7142.86	0	1	2.02119	1
1	1	0	1	1	0	1	0	1	0	0	1	1	1	1	0	0	0	6666.67	0	1	2.99404	1
0	1	0	0	1	0	0	0	0	1	1	0	0	1	1	1	0	1	11666.7	0	1	3.7531	3
0	1	1	1	1	0	0	0	0	1	0	0	0	1	1	1	0	1	5000	0	1	3.23507	2
0	1	1	1	0	0	1	0	0	0	0	0	1	1	1	1	0	0	4666.67	0	1	1.8451	2
0	1	1	1	0	0	1	0	0	1	1	0	0	1	1	0	1	1	10000	0	1	2.82489	3
1	1	0	1	0	0	0	0	0	1	0	0	0	1	1	1	0	1	10000	0	1	3.05898	3
0	1	0	1	0	1	0	0	0	1	1	0	0	1	1	0	0	0	14450	0	1	2.20165	2
0	1	0	0	1	0	0	0	1	1	1	1	1	1	1	0	0	1	8400	0	0	2.38917	3
0	1	1	1	0	1	0	0	1	0	1	0	0	1	1	0	0	1	5625	0	1	2.80371	3
0	1	1	1	0	0	0	0	1	0	1	0	0	1	1	0	1	1	6363.64	0	1	1.9798	2
0	1	1	0	0	0	0	0	0	0	1	0	0	0	1	1	0	1	9333.33	1	1	2.73312	3
0	1	0	0	0	1	1	0	0	0	0	1	0	1	1	0	0	0	8750	0	0	3.2661	3
0	1	0	0	0	0	0	0	0	0	1	0	1	1	1	0	1	0	5000	0	0	2.14613	3
0	1	0	0	0	0	0	0	1	0	0	0	0	1	1	0	0	0	5333.33	0	1	2.61662	2
0	1	0	0	0	0	0	0	0	0	1	0	0	1	0	0	0	0	4454.55	0	1	3.6902	2
0	1	0	0	0	0	0	0	1	1	1	0	0	1	1	0	0	1	11666.7	0	1	2.6488	2
1	1	0	1	0	0	0	0	0	0	1	0	0	1	0	0	0	1	#NULL!	0	1	4.10755	1
0	1	0	0	0	1	1	0	1	0	0	0	0	1	1	0	0	0	4200	0	1	3.55691	2
1	1	0	0	0	0	0	0	0	0	1	0	0	0	0	1	0	1	7000	0	0	1.24304	3
0	1	0	1	0	0	0	0	1	1	0	0	0	0	1	0	1	1	8750	0	1	1.8451	1
0	1	0	1	0	0	0	0	1	0	0	1	0	1	0	0	0	1	25000	0	1	2.78143	1
0	1	1	1	1	0	0	0	0	1	0	1	0	1	1	#NULL!	0	1	1000	0	1	3.32875	3
0	1	1	1	0	0	1	0	0	0	1	1	0	1	1	1	0	0	833.333	0	1	3.64569	3
0	1	0	1	1	0	0	0	0	1	0	1	0	1	1	0	0	0	9333.33	0	1	3.60305	3
0	1	1	1	0	0	0	0	1	1	1	0	0	1	1	1	0	1	3333.33	0	0	3.52386	2
1	1	1	1	0	0	0	0	0	0	1	0	0	0	1	1	0	1	5000	0	0	2.8451	3
0	1	0	1	0	0	0	0	0	0	1	0	0	1	1	0	0	1	7500	0	1	1.24304	3
0	0	0	1	0	1	0	0	1	0	0	0	0	1	1	0	0	1	2857.14	0	1	2.95904	1
0	0	0	1	1	1	1	0	0	0	1	0	0	1	1	1	0	1	8000	0	1	1.24304	2
1	0	0	1	0	0	1	0	1	0	1	0	0	1	1	0	0	0	8750	0	1	3.87559	2
0	0	0	1	0	0	0	0	1	1	0	0	0	1	1	0	0	0	4375	0	1	1.24304	1
0	0	0	1	0	0	0	0	0	0	1	0	0	0	1	1	0	1	4666.67	0	1	1.24304	3
0	0	0	0	0	0	0	0	0	1	1	0	0	1	1	1	0	1	7500	0	1	3.85292	2
0	0	0	0	0	0	0	0	0	0	1	0	0	0	1	0	0	1	5000	0	1	4.98182	1
0	0	0	0	0	0	1	0	0	0	1	0	0	1	1	0	1	1	7000	0	1	1.24304	1
1	0	0	0	0	0	1	0	0	0	1	0	0	1	0	1	0	1	6666.67	0	1	2.10474	1
0	0	0	1	0	1	0	0	0	0	0	0	0	1	1	0	0	1	10000	0	1	1.54407	2
0	0	0	1	0	0	0	0	1	0	0	0	0	1	0	1	1	1	4000	0	1	2.62325	2
0	0	0	1	1	0	0	0	0	1	1	0	0	1	1	0	0	1	8750	1	1	1.54407	3
1	0	0	1	0	0	0	0	0	0	1	0	0	1	1	0	0	1	3000	0	1	1.24304	1
0	0	0	1	0	0	1	0	0	0	0	1	0	1	0	0	0	1	2400	0	1	1.24304	1
0	0	1	1	0	0	0	0	0	0	1	1	0	1	1	0	0	1	7000	0	1	3.84113	2
0	0	0	1	0	1	0	0	0	0	0	1	0	0	1	1	0	1	714.286	0	1	4.23748	3
0	0	0	1	0	1	0	0	0	0	1	0	0	1	1	0	0	1	7000	0	0	3.44219	3
0	0	1	1	0	1	0	0	0	0	0	0	1	1	1	0	0	1	14000	0	0	1.54407	2
0	0	0	1	0	1	0	0	0	0	1	0	0	1	0	0	0	1	11666.7	0	1	3.45207	1
0	0	1	1	0	0	0	0	0	0	1	0	0	0	1	1	0	1	4200	1	1	3.51255	3
0	0	0	0	1	0	0	0	1	1	1	0	0	1	1	0	0	1	11666.7	0	1	1.24304	2
1	0	0	1	1	1	0	0	0	0	0	0	0	1	1	0	0	1	5000	0	1	1.24304	2
1	0	0	1	0	1	0	0	1	0	0	0	0	1	1	0	0	0	9800	0	1	3.02119	3
0	0	0	1	0	0	0	0	1	0	1	0	0	1	1	1	0	1	4666.67	0	1	3.4014	2
0	0	0	0	1	0	0	0	0	0	1	0	0	1	1	1	0	1	7000	0	0	1.8451	3
0	0	0	1	0	0	0	0	0	1	1	0	0	1	1	1	0	1	5600	0	1	3.89361	2
1	0	0	1	0	0	0	0	0	1	1	0	0	1	1	1	0	0	8750	0	1	1.24304	1
0	0	1	1	0	1	0	0	0	0	1	0	0	1	1	0	0	1	5833.33	0	1	1.24304	3
1	0	0	1	1	0	0	0	0	0	0	0	0	1	1	0	0	1	11666.7	0	0	2.6488	3
0	0	1	1	0	1	0	0	1	0	1	0	0	1	1	0	0	1	5000	0	1	1.24304	1
0	0	0	0	#NULL!	#NULL!	#NULL!	#NULL!	#NULL!	#NULL!	0	0	0	0	1	1	1	1	4666.67	0	1	4.90956	3
0	0	0	1	0	1	0	0	0	0	1	0	0	1	1	1	0	1	7000	0	1	1.24304	2
0	0	1	1	1	0	0	0	0	1	1	1	0	1	1	1	0	0	9583.33	0	1	2.73312	2
0	0	0	1	0	1	0	0	1	0	1	0	0	1	1	1	1	1	5250	0	0	2.32222	3
0	0	0	1	0	0	0	0	1	0	1	0	1	1	1	1	0	1	3000	0	1	1.24304	3
0	0	0	1	0	0	1	0	1	0	0	1	0	1	1	0	0	0	5250	0	1	1.24304	3
1	0	1	1	0	0	0	0	0	0	0	1	0	1	1	1	0	0	5833.33	0	1	1.24304	2
1	0	0	1	0	0	1	0	0	0	0	0	0	1	1	0	0	0	10000	0	0	2.90062	3
0	0	1	0	0	0	1	0	0	0	1	1	0	1	1	0	0	1	8750	0	1	3.50786	3
0	0	1	1	0	1	1	1	0	0	0	1	0	1	1	0	0	0	6607.14	0	1	2.24304	2
0	0	0	1	0	0	0	0	0	0	1	1	0	1	1	0	0	1	4200	0	1	2.38917	3
1	0	0	1	0	1	0	0	0	0	1	0	0	1	1	0	0	0	8500	0	1	3.74571	2
0	0	0	1	0	0	1	0	0	0	1	0	0	1	1	0	0	0	8750	0	1	3.67586	3
0	0	0	0	0	1	1	1	0	0	1	0	#NULL!	1	1	0	0	0	10500	0	1	2.02119	1
0	0	0	0	0	0	0	0	1	0	1	0	0	1	1	0	0	1	5600	0	0	2.96507	2
0	0	0	#NULL!	0	#NULL!	#NULL!	#NULL!	#NULL!	#NULL!	1	1	0	1	1	1	0	1	4200	0	1	1.24304	2
0	0	1	1	0	0	0	0	0	1	0	1	1	1	1	0	0	1	7142.86	0	1	1.24304	3
0	0	0	0	0	1	1	0	0	1	1	1	0	1	1	0	0	1	8400	0	1	3.43209	3
1	0	0	1	0	1	0	0	0	0	0	0	0	1	1	0	0	1	8333.33	0	1	1.54407	2
0	0	0	0	0	0	1	0	0	0	1	0	0	1	1	0	0	0	6000	0	1	1.54407	1
1	0	0	1	0	0	0	0	1	1	1	0	0	1	1	0	0	1	7000	0	1	3.00647	1
0	0	0	1	#NULL!	#NULL!	#NULL!	#NULL!	#NULL!	#NULL!	0	0	0	1	1	0	0	1	5600	1	1	2.24304	3
1	0	0	1	1	0	1	0	1	0	0	0	1	1	1	1	0	0	714.286	0	1	1.54407	3
0	0	0	1	0	0	1	0	0	0	0	1	0	1	1	0	0	0	11083.3	0	1	2.28083	2
1	0	0	0	#NULL!	#NULL!	#NULL!	#NULL!	#NULL!	#NULL!	0	0	#NULL!	1	1	0	0	1	8750	0	1	3.39477	3
0	0	0	1	0	0	1	0	0	0	0	0	0	1	1	0	0	0	7000	0	1	4.68708	3
0	0	0	1	1	0	0	0	0	0	0	0	0	1	1	1	1	1	4200	0	1	1.24304	2
1	0	0	1	0	0	0	0	0	0	0	0	0	1	1	0	0	0	10500	0	1	2.99123	1
1	0	0	0	#NULL!	#NULL!	#NULL!	#NULL!	0	#NULL!	0	0	0	1	1	0	0	1	7000	0	1	3.07555	3
1	0	0	1	0	0	1	0	0	0	1	0	0	1	1	0	0	1	5000	0	1	1.24304	3
0	0	0	1	0	1	0	0	0	0	0	0	0	1	0	0	0	0	10333.3	0	0	1.8451	3
1	0	0	1	0	0	0	0	1	0	0	0	1	1	1	0	0	1	5000	0	1	1.24304	2
1	0	0	1	0	0	0	0	0	0	0	0	0	1	1	1	0	1	4200	0	0	1.54407	3
0	0	0	1	0	0	0	0	1	1	1	0	0	1	1	0	1	0	16666.7	0	1	1.24304	3
0	1	0	1	0	1	1	0	1	0	0	0	0	1	1	0	0	0	7678.57	0	1	1.24304	2
0	1	0	0	0	0	1	1	0	0	1	0	0	1	1	0	1	0	11666.7	0	1	2.58546	2
0	1	1	0	1	0	1	1	1	0	1	0	0	1	1	0	0	0	12500	0	1	1.8451	3
1	1	0	1	0	0	0	0	0	0	0	0	0	1	1	0	0	0	10083.3	0	0	1.24304	2
0	1	0	1	0	0	0	0	0	0	0	0	0	1	1	1	0	0	5437.5	0	0	1.24304	3
0	1	0	1	0	1	0	0	0	0	0	0	0	1	1	0	0	0	11875	0	0	1.24304	1
0	1	0	0	0	0	1	0	0	0	1	0	0	1	1	0	0	0	6250	0	0	1.24304	2
0	1	1	0	0	0	0	0	1	1	1	0	0	1	1	0	0	1	7000	1	0	1.24304	2
0	1	0	1	0	0	1	0	0	1	0	0	0	1	1	0	0	0	5714.29	0	1	2.96507	3
0	1	0	0	0	0	0	0	0	0	0	0	1	1	1	0	0	0	6666.67	0	1	1.24304	1
0	1	0	0	0	0	1	0	0	0	0	0	1	1	1	0	0	0	5250	0	1	1.24304	2
0	1	0	1	0	0	1	0	1	0	0	0	0	1	1	0	0	0	1050	0	1	1.54407	2
0	1	0	0	0	0	1	0	0	0	1	0	0	1	0	0	0	0	#NULL!	0	1	3.96657	1
0	1	0	1	0	1	1	0	0	0	0	0	0	1	1	1	1	0	13166.7	0	1	1.24304	1
1	1	0	0	0	0	0	0	0	0	1	0	0	1	0	1	1	1	2500	0	1	2.49831	1
1	1	0	0	0	0	1	0	0	0	1	0	0	1	0	0	1	0	7000	0	1	1.80371	1
1	1	0	0	0	0	0	0	0	0	0	0	0	1	1	0	1	0	#NULL!	0	1	3.57086	2
0	1	0	1	0	0	0	0	1	0	1	0	#NULL!	1	#NULL!	#NULL!	#NULL!	1	5000	0	1	3.72016	2
1	1	0	#NULL!	0	0	1	0	0	1	1	0	0	1	1	0	0	0	3333.33	0	1	3.94547	3
0	1	0	1	0	0	1	0	0	0	1	1	1	1	1	0	1	0	#NULL!	0	1	2.54407	1
1	1	1	0	0	0	0	0	1	0	0	0	0	1	0	0	0	0	#NULL!	0	1	3.93146	1
1	1	0	0	0	1	0	0	0	0	0	0	0	1	1	1	1	0	8750	0	1	3.59258	1
0	1	0	0	0	0	0	0	0	0	1	0	0	1	0	0	0	0	5000	1	1	1.54407	3
0	1	0	0	0	0	0	0	0	0	1	0	1	0	0	0	1	1	2800	0	1	3.6902	3
0	1	0	0	0	0	0	0	0	1	1	0	0	1	1	1	0	1	4900	0	1	3.56337	3
1	1	0	1	0	0	0	0	0	0	1	0	1	1	1	1	0	1	2727.27	0	1	3.23507	3
0	1	0	0	0	1	0	0	0	0	0	0	0	1	0	0	0	1	5833.33	1	1	2.45692	3
0	1	0	0	0	0	0	0	0	0	1	0	0	1	1	0	1	0	9583.33	0	1	3.4014	1
0	1	0	0	0	0	0	0	0	0	1	0	0	1	1	1	0	1	3000	0	1	3.37191	2
1	1	0	0	0	1	1	0	0	0	1	0	0	1	1	1	1	0	7625	1	1	3.11546	1
0	1	1	0	0	1	1	0	0	0	0	0	1	1	1	1	1	0	11916.7	0	0	4.47349	3
0	1	0	0	0	1	1	0	0	0	0	0	0	1	0	0	0	0	#NULL!	0	0	1.24304	1
0	1	0	0	0	0	0	0	1	0	1	0	0	1	0	0	1	0	2500	1	0	3.90751	1
1	1	1	1	0	1	1	0	0	0	1	0	0	1	0	0	0	0	8888.89	0	1	3.58546	3
0	1	0	0	0	1	1	0	0	0	0	0	0	1	0	0	0	0	13750	0	0	3.53206	3
0	1	0	1	0	0	0	0	0	0	0	0	0	1	1	0	0	1	10000	0	0	1.24304	3
1	1	0	1	0	0	0	0	0	1	0	0	0	1	0	0	0	0	11666.7	0	0	3.63043	1
0	1	0	0	0	1	1	0	0	0	0	0	0	1	1	0	0	0	12083.3	0	1	2.02119	3
1	1	0	0	0	1	0	0	0	0	1	0	0	0	1	1	0	0	10250	1	1	1.8451	1
1	1	0	0	0	1	1	1	0	0	0	0	1	1	0	0	0	0	700	0	1	2.14613	1
1	1	0	1	0	1	1	0	0	0	1	0	1	1	1	0	0	0	13000	0	1	4.84073	1
1	1	0	0	0	0	1	0	0	0	1	#NULL!	#NULL!	#NULL!	#NULL!	#NULL!	#NULL!	0	11666.7	1	#NULL!	1.24304	#NULL!
1	1	0	0	0	0	0	0	0	0	0	0	1	1	1	0	0	0	10000	0	1	2.92428	2
1	1	1	1	0	0	0	0	0	0	1	0	0	1	1	0	1	0	2000	0	1	3.45207	1
0	1	1	0	#NULL!	#NULL!	#NULL!	#NULL!	#NULL!	#NULL!	0	0	0	1	1	0	0	1	7000	1	1	3.50786	3
0	1	1	1	0	1	0	0	1	0	1	0	0	1	1	0	0	1	1428.57	0	1	2.02119	1
1	1	0	1	0	0	0	0	0	0	0	0	0	1	1	0	0	0	3111.11	1	1	1.54407	3
0	1	0	1	0	1	0	0	0	0	0	0	0	1	0	0	0	1	7000	0	1	1.24304	1
1	1	0	1	0	0	0	0	0	0	0	0	0	1	1	0	0	1	8750	1	1	2.8451	3
1	1	0	1	0	1	1	1	0	0	0	0	0	1	1	0	0	0	1000	1	1	2.02119	3
1	1	0	0	0	0	1	0	1	0	1	0	0	1	1	0	1	0	11000	1	1	3.66999	3
0	1	1	0	0	0	0	0	0	0	1	0	1	1	1	0	0	1	#NULL!	0	1	3.20165	3
0	1	0	0	0	0	0	0	0	0	1	0	0	0	1	0	0	0	8750	0	1	2.79934	1
0	1	1	1	0	1	0	0	0	0	1	0	0	1	1	0	0	1	6750	0	1	2.99123	2
0	1	0	0	0	0	0	0	0	0	1	0	0	0	1	1	0	1	2800	1	1	2.32222	3
#NULL!	1	0	1	0	0	0	0	0	0	1	0	1	0	1	0	0	1	5250	0	1	3.41116	2
1	1	0	0	0	0	0	0	0	0	1	0	0	1	1	0	0	1	11687.5	1	1	2.40577	2
0	1	0	1	0	0	0	0	0	0	0	0	0	0	1	1	0	1	3000	0	0	1.24304	2
0	1	0	1	0	1	1	0	0	0	0	0	0	1	1	0	0	0	4291.67	0	1	1.24304	1
0	1	0	1	0	0	0	0	0	0	1	0	0	0	1	1	0	1	6000	0	1	1.8451	2
0	1	0	0	0	0	0	0	0	0	1	0	0	1	1	0	0	1	10000	0	1	3.51551	3
0	1	0	1	0	0	0	0	0	0	1	0	1	1	1	0	0	1	4200	0	1	3.54407	3
0	1	0	1	0	1	0	0	1	0	1	0	0	1	1	0	1	0	3500	0	1	3.80803	1
0	1	0	0	0	0	1	0	1	0	1	0	0	0	1	0	0	0	9333.33	0	1	3.44716	2
0	1	0	1	0	0	0	0	0	0	1	0	0	1	1	0	0	1	6000	0	1	2.8451	3
0	1	0	1	0	0	0	0	0	0	0	0	0	0	1	0	0	0	3333.33	0	1	1.24304	3
0	1	0	1	0	0	0	0	0	0	1	0	0	1	1	0	#NULL!	1	1428.57	0	1	1.24304	#NULL!
0	1	0	1	0	1	1	1	1	0	1	0	0	1	0	0	0	0	12500	0	1	1.24304	1
0	1	0	0	0	0	0	0	0	0	1	0	0	0	1	0	0	0	5250	0	1	3.42488	1
0	1	0	0	0	0	0	0	0	0	1	0	0	1	1	0	0	1	5250	0	0	3.4014	3
0	1	0	1	0	0	0	0	0	0	1	0	0	0	1	1	0	0	2625	0	0	1.24304	3
0	1	1	1	0	0	0	0	0	0	0	0	0	1	1	0	0	0	4166.67	0	0	4.66792	3
0	1	1	0	0	0	0	0	0	0	1	0	0	1	1	0	0	1	9500	0	0	3.24304	3
0	1	1	0	0	0	0	0	0	0	1	0	0	1	0	0	0	1	6666.67	0	0	2.6902	1
0	1	0	1	0	0	0	0	0	0	0	0	0	1	1	0	0	0	8750	0	0	2.73312	1
0	1	0	1	0	0	0	0	0	0	1	0	0	0	1	0	0	1	5000	0	0	1.54407	2
0	1	0	1	0	0	0	0	1	0	0	0	0	1	1	0	1	0	10000	0	0	1.24304	3
1	1	0	1	0	0	0	0	0	0	1	0	0	1	1	0	0	1	3000	0	0	2.99404	3
1	1	1	1	0	0	1	0	0	0	0	0	0	1	1	0	0	0	9000	0	1	1.54407	2
0	1	0	0	0	0	1	0	0	1	0	1	#NULL!	1	1	0	0	0	11666.7	0	1	3.5611	1
0	1	0	0	0	0	0	0	0	1	1	0	0	1	1	0	1	0	8750	0	1	2.78143	1
0	1	0	1	0	0	0	0	0	1	1	0	0	1	1	0	0	1	3888.89	1	1	2.32222	2
0	1	0	0	0	1	1	0	0	0	0	0	0	1	1	0	1	0	12333.3	0	1	1.24304	1
0	1	0	1	0	0	0	0	1	0	1	0	0	1	1	0	0	1	3888.89	0	1	3.23507	1
0	1	0	1	0	1	1	0	0	0	0	1	1	1	1	0	0	0	3863.64	0	1	2.6902	3
0	1	0	0	0	1	1	0	0	0	0	0	1	1	1	0	0	0	8000	0	1	1.24304	2
0	1	0	1	0	0	0	0	0	0	0	0	#NULL!	1	1	0	0	1	2777.78	0	0	1.24304	1
0	1	1	#NULL!	0	#NULL!	#NULL!	#NULL!	#NULL!	#NULL!	1	0	0	1	1	1	0	1	5000	0	0	1.24304	3
0	1	1	1	0	0	0	0	0	1	1	0	0	1	1	0	1	1	8750	0	1	3.78711	3
0	1	0	1	0	0	0	0	0	1	1	0	1	1	1	0	0	1	6428.57	0	1	2.44716	3
0	1	1	#NULL!	1	#NULL!	#NULL!	#NULL!	#NULL!	#NULL!	1	0	0	1	1	0	0	1	5000	0	1	2.24304	#NULL!
0	1	1	1	0	0	0	0	1	1	0	0	0	1	1	0	0	0	6250	0	1	2.54407	3
0	1	1	0	0	0	0	0	0	0	0	0	0	1	1	0	0	1	8750	0	1	1.8451	2
0	1	1	0	0	0	1	0	0	1	0	0	1	1	1	0	0	0	10000	0	1	1.24304	1
0	1	0	0	0	0	0	0	0	0	0	0	0	1	1	0	0	1	11666.7	1	0	1.24304	#NULL!
0	0	1	1	0	0	0	0	0	1	0	0	0	1	1	0	1	1	4375	0	1	1.24304	2
1	0	0	1	0	0	0	0	0	0	1	0	0	1	1	0	1	1	5000	0	1	3.13614	2
0	0	0	0	0	0	0	0	0	0	0	0	0	1	1	0	0	1	10666.7	0	1	1.54407	2
0	0	0	0	0	0	0	0	1	1	0	0	0	1	1	0	0	1	11666.7	0	1	1.24304	1
0	0	1	1	0	0	0	0	0	0	1	0	0	1	1	0	0	1	5666.67	0	1	1.24304	1
1	0	0	1	0	1	0	0	1	1	1	0	0	1	1	0	0	0	5833.33	0	1	1.24304	2
0	0	1	1	0	0	0	0	0	0	1	0	0	1	1	0	1	1	4375	1	1	3.94201	1
0	0	1	1	0	0	0	0	0	0	1	0	0	1	1	0	0	1	7000	0	1	1.24304	3
0	0	0	1	0	0	0	0	0	1	1	0	1	1	1	0	0	0	6666.67	1	0	3.35393	3
0	0	0	1	0	0	0	0	1	0	1	1	0	1	1	0	0	1	3076.92	0	0	1.24304	3
0	0	0	1	0	0	0	0	0	1	1	1	0	1	1	1	0	1	8750	0	0	1.54407	3
0	0	0	0	0	0	0	0	0	0	0	0	0	1	1	0	0	1	5000	0	0	5.24304	3
0	0	0	0	0	0	0	0	1	1	1	1	1	1	1	0	0	1	7000	0	1	1.54407	2
1	0	0	1	0	0	0	0	0	0	0	0	0	1	1	0	0	1	7500	0	1	2.8451	2
0	0	0	0	0	1	0	0	0	1	1	0	1	1	1	0	0	1	5250	0	0	2.6902	3
0	0	0	0	0	1	0	0	0	1	1	0	1	1	1	0	0	0	5000	0	0	1.24304	3
0	0	0	1	0	0	0	0	1	0	0	0	1	1	1	0	0	1	8333.33	0	0	1.24304	3
0	0	0	0	0	0	0	0	0	0	1	0	0	1	1	0	1	1	7000	0	0	3.00647	3
0	0	1	1	0	0	0	0	0	1	1	0	0	1	1	0	1	1	3000	1	0	1.24304	3
0	0	0	1	0	1	0	0	0	0	0	0	0	1	1	0	0	1	4200	0	1	1.54407	2
0	0	1	1	0	1	0	0	0	0	1	0	0	1	1	0	0	1	7000	0	1	1.24304	3
0	0	1	1	0	1	1	0	1	1	0	1	0	1	1	0	0	0	4375	0	1	5.24304	2
0	0	0	1	0	0	0	0	0	1	0	0	0	1	1	1	1	0	9333.33	0	1	1.8451	1
0	0	0	1	0	0	0	0	0	0	1	0	0	1	1	0	0	0	5000	0	1	1.24304	1
0	0	0	0	0	1	0	0	0	1	1	0	0	1	1	0	0	1	5000	0	1	4.78211	2
0	0	0	0	0	1	0	0	0	0	1	0	0	1	1	0	0	1	6250	0	1	1.24304	1
0	0	0	1	0	0	0	0	0	0	1	0	0	1	1	1	0	1	5000	0	1	1.8451	3
0	0	0	0	0	1	0	0	1	0	0	0	0	1	1	0	0	1	3500	0	1	2.86629	3
0	0	1	1	0	0	0	0	0	0	0	0	0	1	1	0	0	1	7000	0	0	2.14613	2
0	0	1	1	0	0	0	0	0	0	1	0	0	1	1	0	0	1	7000	0	0	2.54407	3
0	0	0	1	0	0	0	0	0	0	1	0	1	1	1	0	0	1	3500	0	0	2.94201	3
0	0	1	1	0	0	0	0	0	1	0	0	0	1	1	0	0	1	7000	0	0	1.24304	3
0	0	0	0	0	0	0	0	0	1	1	0	0	0	1	0	0	1	7000	0	0	2.9058	2
1	0	1	0	0	0	0	0	0	0	1	0	0	1	1	0	0	1	5250	1	0	2.24304	2
0	0	0	0	0	0	0	0	0	1	1	0	0	1	1	0	0	1	6250	0	0	3.41649	2
0	0	0	#NULL!	0	#NULL!	#NULL!	#NULL!	#NULL!	#NULL!	1	1	0	0	1	0	0	1	2857.14	0	0	2.14613	2
0	0	0	#NULL!	0	#NULL!	#NULL!	#NULL!	#NULL!	#NULL!	1	0	0	1	1	0	1	1	5333.33	1	0	1.24304	1
0	0	1	1	0	0	0	0	0	1	0	0	0	1	1	0	0	1	5833.33	0	0	1.24304	2
0	0	1	1	0	0	0	0	0	0	1	1	0	1	1	0	0	1	7000	1	1	2.94983	3
1	0	0	0	0	0	0	0	0	0	1	0	0	1	1	0	0	0	7000	0	0	3.62325	3
0	0	1	0	0	0	0	0	0	0	1	0	0	1	1	0	0	1	11666.7	0	1	1.54407	2
0	0	1	0	0	0	0	0	0	0	1	0	0	1	1	0	0	0	5833.33	0	0	4.55267	2
0	0	0	1	0	0	1	1	0	1	0	0	0	1	1	0	0	0	6785.71	1	0	1.80371	3
0	0	0	0	0	0	0	0	0	0	1	0	0	1	1	0	1	0	5625	0	1	1.8451	3
1	0	0	1	0	1	0	0	0	0	0	0	0	1	1	0	1	0	5000	1	1	3.74322	3
1	0	0	1	0	1	1	0	0	1	1	1	0	1	1	1	1	0	6666.67	0	1	2.32222	2
0	0	1	1	0	1	1	0	0	0	1	0	0	1	1	0	0	0	6000	0	1	3.65189	2
0	0	0	1	0	0	0	0	0	1	1	0	0	1	1	1	0	1	7000	0	0	1.24304	3
0	0	0	0	0	0	0	0	0	0	0	1	0	1	1	0	0	0	8000	0	1	2.77452	2
0	0	0	0	0	0	0	0	1	0	1	1	0	0	1	0	1	0	6666.67	0	1	2.34777	3
0	0	0	0	0	0	0	0	1	1	1	0	0	1	1	0	0	1	5000	1	0	1.54407	3
0	0	1	0	0	0	0	0	0	1	1	1	0	1	1	0	0	1	10000	0	1	1.24304	3
0	0	0	0	0	0	0	0	0	1	1	0	0	1	1	0	1	1	7000	0	0	1.24304	3
0	0	1	1	0	0	0	0	1	0	0	0	0	1	1	0	1	1	7000	0	1	2.94983	2
1	0	0	1	0	0	0	0	0	0	1	0	0	1	1	0	0	0	5000	0	1	2.14613	1
0	0	0	1	0	0	0	0	0	0	1	0	0	1	1	0	0	1	8400	0	1	3.04922	3
1	0	1	0	0	0	1	0	0	1	0	0	0	1	1	1	0	0	6000.5	1	1	3.4003	3
0	0	0	0	0	1	1	0	0	0	1	1	0	1	1	0	0	0	20000	1	1	2.38917	3
0	0	0	0	0	1	1	0	0	0	0	0	#NULL!	1	1	1	0	1	5166.67	0	1	2.44716	2
0	0	0	1	0	0	1	0	0	1	0	0	0	1	1	0	0	0	2937.5	0	1	3.54407	2
0	0	0	1	0	1	1	0	1	1	1	1	0	1	1	0	0	0	2916.67	0	1	1.24304	2
1	0	1	1	0	0	0	0	1	0	1	1	0	1	1	0	0	1	3181.82	0	1	1.24304	2
0	0	1	0	0	0	1	0	1	1	1	0	0	1	1	1	0	1	8750	0	1	3.8644	3
0	0	0	1	0	0	0	0	1	0	1	0	0	1	1	0	0	1	7500	0	1	1.24304	2
1	0	0	1	0	1	0	0	1	0	0	0	0	1	1	0	1	1	3500	0	1	1.54407	1
0	0	0	1	0	1	0	0	0	1	1	0	0	1	1	1	0	0	7500	0	1	1.24304	1
0	0	0	1	0	1	0	0	1	1	1	1	0	1	1	0	0	1	3500	0	1	1.54407	1
0	0	0	1	0	0	1	0	1	0	1	0	0	1	1	0	0	0	5000	0	1	#NULL!	1
0	1	0	0	0	0	0	0	1	1	0	0	0	1	1	1	0	0	5833.33	0	1	1.54407	2
0	1	0	1	0	0	0	0	1	1	0	0	0	1	1	0	0	1	7000	0	1	3.34777	1
0	1	0	0	0	0	0	0	1	1	1	0	0	1	1	0	1	0	10000	0	1	3.91598	1
0	1	0	1	0	0	0	0	0	0	1	0	0	1	1	0	0	1	5000	0	1	1.24304	2
0	1	0	1	0	0	1	0	0	1	0	0	0	1	1	1	0	0	5000	0	1	1.54407	2
0	1	0	0	0	0	1	0	0	1	1	0	0	1	1	0	0	0	6666.67	0	1	1.24304	2
0	1	0	0	0	0	1	0	0	1	1	0	0	1	1	1	1	0	7000	0	1	2.20165	3
0	1	0	1	0	1	1	1	1	0	0	1	0	1	1	0	0	0	8928.57	0	1	1.24304	2
0	1	0	1	0	1	1	1	0	1	1	1	1	1	1	0	0	0	11250	0	1	1.24304	2
1	1	1	0	0	1	1	0	0	0	1	0	0	1	1	1	0	0	7000	0	0	1.24304	3
0	1	1	0	0	1	1	1	0	0	1	0	0	1	1	0	0	0	10416.7	0	0	2.02119	2
0	1	0	1	0	1	1	1	1	0	0	1	1	1	1	1	0	0	6800	0	1	2.91765	2
1	1	1	0	0	0	0	0	0	0	1	0	0	1	1	0	0	0	5000	0	1	4.902	1
0	1	0	0	0	0	0	0	0	0	0	0	0	1	1	0	0	1	7000	0	1	4.8537	3
1	1	0	0	0	0	1	0	0	1	0	0	0	1	1	0	0	0	9666.67	0	1	2.28083	1
1	1	0	0	0	0	1	0	0	0	1	0	0	1	1	0	0	0	3571.43	1	1	1.24304	1
1	1	0	0	0	0	0	0	0	0	0	0	1	1	1	0	0	0	5312.5	0	1	2.74819	1
1	1	0	1	0	0	0	0	0	0	0	0	0	1	1	0	1	0	7000	0	1	3.71486	3
1	1	0	1	0	0	1	0	0	0	0	1	0	1	1	0	0	0	3000	0	1	1.24304	1
0	1	0	1	0	0	0	0	0	0	1	0	0	1	1	0	1	1	5000	0	1	2.78143	2
0	1	0	0	0	1	1	1	0	0	0	1	0	1	0	0	1	0	8611.11	0	1	3.99739	1
0	1	1	1	0	0	0	0	0	0	1	0	0	1	1	0	1	0	11666.7	0	1	3.74322	3
0	1	0	0	1	1	1	0	0	0	0	0	0	1	1	0	1	0	11666.7	0	1	4.18355	1
0	1	0	1	0	0	0	0	0	1	0	0	0	1	1	0	0	1	8750	0	1	3.99123	3
0	1	0	0	0	0	0	0	0	0	1	0	0	1	1	0	0	1	7000	0	1	1.8451	3
0	1	0	1	0	0	0	0	0	0	1	0	0	0	1	0	0	0	4000	0	1	1.24304	3
0	1	0	1	1	0	1	0	0	0	0	0	0	1	1	0	0	0	6562.5	0	1	2.86629	3
0	1	0	1	1	0	1	0	0	0	1	0	0	1	1	0	0	0	12500	0	0	3.52386	3
0	1	0	0	0	0	1	0	0	0	0	0	0	0	1	0	0	0	7000	0	1	4.5611	2
0	1	1	0	0	0	0	0	0	0	0	0	0	0	1	1	0	0	4666.67	1	1	1.24304	1
0	1	1	1	0	0	0	0	0	0	1	0	0	0	0	1	0	1	8750	1	1	3.04674	3
0	1	0	0	0	0	1	0	0	0	0	0	0	1	1	0	0	0	3071.43	0	1	3.23507	1
0	1	0	0	0	1	1	0	0	0	0	0	0	1	1	0	1	0	18750	0	1	3.15685	1
0	1	1	0	0	1	1	0	0	0	0	0	0	1	1	0	0	0	11666.7	0	1	3.85292	2
0	1	0	1	0	0	0	0	0	0	0	0	0	1	1	0	1	1	2916.67	0	1	1.24304	2
0	1	1	0	0	0	0	0	1	0	0	0	0	1	1	0	0	1	3500	0	1	1.24304	2
0	1	1	1	0	0	0	0	0	1	0	0	0	1	1	0	0	1	12600	0	0	1.24304	3
0	1	0	0	0	0	0	0	0	0	1	0	0	1	1	0	1	1	4666.67	0	1	3.7796	2
1	1	0	0	0	0	0	0	0	0	0	0	0	1	1	0	0	1	5000	0	0	3.21617	2
0	1	0	0	0	0	0	0	0	0	1	0	0	1	1	0	0	0	4666.67	0	0	1.54407	2
0	1	1	1	0	0	1	0	0	0	0	0	0	1	1	0	0	1	5000	0	1	3.43616	1
0	1	0	0	0	0	0	0	0	0	1	0	0	0	1	0	0	1	2800	0	1	2.94201	1
0	1	0	1	0	0	0	0	0	0	0	0	0	1	1	0	1	0	1750	0	1	3.40739	1
0	1	0	0	#NULL!	#NULL!	#NULL!	#NULL!	#NULL!	#NULL!	0	#NULL!	#NULL!	#NULL!	#NULL!	#NULL!	#NULL!	#NULL!	#NULL!	0	#NULL!	3.20165	1
0	1	1	0	0	0	1	0	0	0	0	0	1	1	1	0	1	0	3625	0	0	2.02119	2
0	1	0	0	0	0	0	0	0	0	0	0	0	1	1	0	1	0	7000	0	1	1.24304	2
0	1	1	1	0	0	0	0	0	0	0	0	0	1	1	1	0	1	2800	0	1	4.25164	3
0	1	1	1	0	0	0	0	0	0	0	0	0	1	1	1	1	1	8750	0	1	4.05898	1
1	1	0	0	0	0	1	0	0	0	1	0	0	1	1	0	1	0	10500	0	1	2.54407	1
0	1	0	0	0	0	1	0	0	0	1	0	0	1	1	0	1	0	11666.7	0	1	1.8451	3
0	1	0	0	1	1	1	0	0	0	0	0	0	1	1	0	0	0	6250	0	0	1.54407	2
0	1	1	1	1	0	0	0	0	0	0	0	0	1	1	0	0	1	8400	0	1	2.8451	2
0	1	0	0	0	0	0	0	0	0	1	0	0	1	1	1	0	1	4200	0	1	3.51255	3
0	1	0	0	0	1	1	1	0	0	1	0	0	1	1	0	0	0	3000	1	1	2.10474	1
1	1	0	0	0	1	0	0	0	1	0	0	0	1	1	0	0	0	4812.5	0	1	1.8451	1
0	1	0	0	0	1	1	0	0	0	0	0	0	1	1	0	0	0	15500	0	1	1.24304	1
0	1	0	1	0	0	0	0	0	0	1	0	0	1	1	0	0	1	8400	0	1	3.00647	2
0	1	0	1	0	0	0	0	0	0	0	0	0	1	1	0	0	0	2100	0	1	2.72016	2
0	1	0	0	0	0	0	0	0	0	1	0	0	1	1	0	0	1	4375	0	1	888888	3
0	1	1	1	0	0	0	0	0	1	0	0	0	1	1	0	0	0	3000	0	1	2.54407	#NULL!
0	1	1	1	0	0	0	0	0	1	0	0	0	1	1	0	0	1	5000	0	1	3.61995	2
0	1	1	0	0	1	1	1	0	0	0	0	0	1	1	0	0	0	8000	0	1	1.24304	2
0	1	0	0	0	0	0	0	0	0	0	0	0	1	1	1	0	1	7000	0	1	3.48359	1
0	1	1	0	0	0	0	0	0	0	0	0	0	1	1	0	0	0	5000	0	1	1.24304	1
1	1	1	0	0	0	0	0	0	0	0	0	0	1	1	0	0	0	5250	0	1	2.02119	1
1	1	0	0	0	0	1	0	0	0	1	0	0	1	1	0	0	1	4750	0	1	3.44716	3
0	1	0	0	0	1	1	1	0	0	1	0	0	0	0	0	0	0	7750	0	1	2.49831	1
0	1	0	1	0	0	0	0	0	0	1	0	0	1	1	1	0	1	4666.67	0	1	3.20683	1
0	1	1	0	0	0	0	0	0	0	0	0	0	1	1	1	0	0	8750	0	1	3.80371	2
0	1	0	0	0	0	1	0	0	0	1	0	0	1	1	0	0	0	7000	0	1	2.02119	1
0	1	1	1	0	0	1	1	0	0	0	0	0	1	1	0	1	0	6000	1	1	3.548	2
0	1	1	0	0	0	1	0	0	0	0	0	0	1	1	0	1	0	11666.7	0	1	2.54407	3
0	1	0	1	0	0	1	1	0	0	0	0	0	1	1	0	0	0	5600	0	1	1.24304	1
0	1	1	1	0	0	0	0	0	0	0	0	0	1	1	0	0	1	4666.67	0	1	1.24304	3
0	1	0	1	0	0	0	0	1	1	0	0	0	1	1	1	1	1	8000	0	1	4.3075	2
0	1	0	1	0	1	0	0	0	0	1	0	0	1	1	0	0	1	2625	0	1	2.8451	2
0	1	0	1	0	0	1	0	0	1	1	0	0	1	1	1	0	1	3000	0	1	4.22449	3
0	1	0	0	1	0	0	0	0	1	1	0	0	1	1	0	0	1	7000	0	1	2.79934	2
0	1	0	0	0	0	0	0	0	1	1	0	0	1	1	0	1	1	3500	0	1	1.8451	1
0	1	0	0	0	0	1	1	0	0	0	0	0	1	1	1	0	0	7000	0	0	3.66464	2
0	1	0	0	0	0	0	0	0	0	1	0	0	1	1	0	1	0	12250	0	1	2.67877	1
0	1	1	1	0	0	0	0	0	1	0	0	0	1	1	1	0	1	4666.67	0	1	1.24304	1
0	1	0	1	0	0	0	0	0	0	1	0	0	1	1	0	1	1	14000	0	1	1.24304	3
0	1	0	1	0	1	0	0	0	0	0	0	0	1	1	0	1	0	7000	0	1	3.41649	1
0	1	0	1	0	0	0	0	0	0	1	0	0	1	1	1	0	1	5250	0	1	1.24304	3
0	1	1	1	1	0	0	0	0	1	0	0	0	1	1	0	0	1	4375	0	0	1.24304	3
0	1	0	1	0	0	0	0	0	0	1	0	0	1	1	1	0	1	1909.09	0	0	1.24304	3
0	1	1	0	0	1	0	0	0	0	1	0	0	1	1	1	0	0	5250	0	1	1.24304	3
1	1	0	1	1	0	0	0	0	1	0	0	0	1	1	0	1	1	4200	1	1	2.75795	1
0	1	1	1	0	1	1	0	0	0	0	1	1	1	1	0	0	0	7045.45	0	1	2.34777	3
0	1	1	1	0	1	1	1	0	0	0	1	0	1	1	0	0	0	15250	0	1	2.6488	2
0	1	0	1	0	1	1	1	0	0	1	1	0	1	1	0	0	0	7000	0	1	2.54407	2
0	1	0	0	0	0	1	0	0	0	1	0	0	1	1	0	0	0	7300	0	1	1.24304	3
0	1	0	1	0	1	1	1	0	0	0	1	0	1	1	0	0	0	7750	0	1	1.24304	1
0	1	0	0	0	0	0	0	0	1	1	0	0	1	1	1	0	0	5450	0	1	1.24304	3
0	1	0	0	0	1	1	0	0	0	0	0	0	1	1	0	0	0	9375	0	1	1.54407	2
0	1	0	1	1	0	0	0	0	0	0	0	0	1	1	0	0	0	4200	0	1	3.51255	2
0	1	0	1	0	0	0	0	0	1	1	0	0	1	1	1	1	1	3888.89	0	1	3.44716	3
0	1	1	1	1	0	0	0	0	0	0	0	0	1	1	0	0	1	8750	0	1	3.4417	2
0	1	0	1	1	0	0	0	0	0	1	0	0	1	1	1	0	1	5250	0	1	1.24304	1
0	1	1	1	0	0	1	0	0	0	1	0	0	1	1	0	0	1	5250	0	1	3.04674	3
0	0	0	1	0	0	0	0	0	0	1	0	0	0	1	0	0	1	1750	0	1	2.54407	3
0	0	1	0	0	0	0	0	0	0	0	0	0	1	1	0	0	1	9333.33	0	1	1.54407	2
0	0	0	1	0	0	0	0	1	1	1	0	0	1	1	0	1	1	7000	0	1	3.20165	2
0	0	1	1	0	0	0	0	0	1	1	0	0	1	1	0	0	1	7000	0	1	1.80371	1
0	0	0	1	0	0	0	0	0	0	1	0	0	1	1	1	0	1	3888.89	0	1	3.366	1
0	0	0	1	0	0	0	0	0	0	1	0	0	1	1	0	0	1	9333.33	0	1	1.24304	1
0	0	0	1	0	1	0	0	0	0	1	0	0	1	1	0	1	1	5833.33	0	1	1.24304	1
0	0	0	0	0	0	0	0	0	0	0	0	0	1	1	0	1	0	14000	0	1	1.24304	1
1	0	0	0	0	0	0	0	0	0	1	0	0	1	1	0	0	0	11666.7	0	1	1.24304	1
1	0	1	1	0	1	0	0	1	0	0	0	0	1	1	1	1	1	4666.67	0	1	1.54407	1
0	0	0	0	0	0	1	0	0	0	1	1	0	1	1	0	1	1	5250	0	1	1.8451	2
1	0	1	1	0	0	0	0	0	0	1	0	0	1	1	0	0	1	4666.67	0	1	1.24304	1
0	0	0	1	0	0	1	0	1	0	1	0	0	1	1	0	0	1	4200	0	1	2.54407	1
0	0	0	1	0	0	0	0	0	0	1	0	0	1	1	0	1	1	8750	0	1	3.35393	3
0	0	0	1	1	0	1	0	0	0	1	1	1	0	1	0	0	0	2333.33	0	1	2.34777	3
0	0	1	1	0	0	0	0	0	0	0	0	0	1	1	0	0	1	5000	0	0	2.14613	1
0	0	0	1	0	0	0	0	0	0	0	0	0	1	1	0	1	1	7000	0	0	2.44716	3
0	0	0	1	0	0	0	0	0	1	1	0	0	1	1	0	0	1	8750	0	0	1.24304	2
1	0	1	0	0	1	0	0	1	0	0	0	0	1	1	0	0	0	7833.33	0	0	1.24304	3
1	0	1	1	0	1	0	0	0	0	0	0	0	1	1	1	0	1	4900	0	1	1.24304	1
0	0	1	1	0	0	0	0	0	0	0	0	0	1	1	1	0	1	4375	0	1	2.86629	3
0	0	0	1	0	1	0	0	1	0	1	0	0	1	1	0	0	0	5250	0	1	5.24304	3
0	0	0	1	0	1	0	0	0	1	1	0	0	1	1	0	1	1	2333.33	0	1	2.54407	1
0	0	1	#NULL!	#NULL!	#NULL!	#NULL!	#NULL!	#NULL!	#NULL!	0	0	0	1	1	1	1	1	4666.67	0	1	1.24304	2
0	0	1	1	0	0	0	0	0	1	0	0	0	1	1	0	0	1	1750	0	1	1.24304	2
0	0	0	1	0	0	0	0	1	1	1	0	0	1	1	0	0	1	7000	0	1	1.24304	2
0	0	0	1	0	1	0	0	0	1	1	0	0	1	1	0	0	1	5600	0	1	1.24304	2
0	0	0	0	0	0	0	0	0	0	1	0	0	1	1	0	1	1	5250	0	0	4.68079	3
0	0	0	1	0	0	0	0	0	0	0	0	0	1	1	0	0	1	5000	0	0	1.24304	2
0	0	1	1	0	1	0	0	1	0	0	0	0	1	1	0	0	1	2000	0	0	2.8451	1
0	0	1	1	1	1	1	0	0	0	0	0	0	1	1	0	0	1	3818.18	0	0	3.82282	3
0	0	0	0	0	1	0	0	0	1	1	0	0	0	1	1	0	1	4666.67	0	0	1.24304	3
0	0	0	0	0	0	0	0	0	0	1	0	0	1	1	0	0	1	11666.7	0	0	1.24304	3
0	0	0	0	0	0	0	0	0	0	1	0	0	1	1	0	0	1	14000	0	0	1.24304	2
0	0	0	0	0	0	0	0	0	0	1	0	0	0	1	0	0	1	6000	0	0	1.54407	2
0	0	1	1	0	0	0	0	0	0	0	0	0	1	1	0	0	1	2625	0	0	1.24304	2
0	0	0	1	0	0	0	0	0	0	1	1	0	1	1	0	0	1	4200	0	0	2.02119	3
0	0	1	1	0	0	0	0	0	1	0	0	0	1	1	0	0	1	4571.43	0	0	3.99123	3
0	0	0	1	0	0	0	0	0	0	1	1	0	1	1	0	0	0	8166.67	0	1	3.63621	1
0	0	0	0	0	0	0	0	0	0	1	0	0	1	1	0	0	1	9333.33	1	0	2.8451	1
0	0	0	1	1	0	0	0	0	1	1	1	0	1	1	0	0	1	5250	1	1	3.31559	3
0	0	1	1	0	0	0	0	0	1	1	0	0	1	1	0	1	1	5250	0	1	2.6902	3
0	0	1	1	0	0	0	0	0	0	1	1	1	1	1	#NULL!	0	0	6125	0	1	1.24304	2
0	0	0	1	1	0	0	0	0	0	1	0	0	1	1	0	1	1	10500	0	1	2.49831	2
1	0	0	1	0	0	0	0	0	0	1	0	0	0	1	0	1	0	7000	0	1	3.40739	3
0	0	1	1	0	1	0	0	0	0	1	0	0	1	1	0	0	1	10000	0	0	1.24304	1
0	0	0	1	0	1	0	0	1	1	0	1	0	1	1	0	0	1	8750	0	1	1.24304	1
0	0	0	1	0	0	0	0	0	0	0	1	0	0	1	0	0	1	4375	0	1	3.548	3
1	0	0	1	0	0	0	0	0	0	0	1	0	1	1	0	0	0	9333.33	0	1	1.24304	1
0	0	1	1	0	0	0	0	0	0	1	1	0	1	1	0	0	1	4200	0	1	2.32222	1
0	0	0	0	0	1	0	0	0	0	1	1	0	1	1	#NULL!	0	1	5250	0	1	1.24304	3
1	0	0	1	0	1	0	0	0	0	0	0	0	1	1	0	0	1	7000	0	1	1.8451	1
0	0	0	1	0	0	1	0	0	0	1	0	1	1	1	0	0	0	4083.33	0	1	1.8451	3
1	0	1	1	0	0	0	0	0	0	1	0	0	1	1	0	0	0	3111.11	0	1	1.24304	3
0	0	1	#NULL!	0	#NULL!	#NULL!	#NULL!	#NULL!	#NULL!	1	0	0	1	1	0	0	1	3500	0	1	3.40577	2
0	0	0	1	0	0	1	0	1	0	1	1	1	1	1	0	0	0	5833.33	0	1	2.45692	2
0	0	0	#NULL!	0	#NULL!	#NULL!	#NULL!	#NULL!	#NULL!	1	0	0	1	1	#NULL!	0	1	5250	0	1	2.79934	3
0	0	0	1	0	0	0	0	0	0	1	0	0	1	1	0	0	1	5250	0	1	2.99404	2
0	0	0	1	0	1	0	0	0	0	1	0	1	1	0	0	0	0	7000	0	1	2.38917	2
0	0	0	1	0	0	0	0	0	0	1	0	0	1	1	0	0	1	11666.7	0	1	1.24304	2
0	0	0	1	0	1	0	0	1	0	1	0	0	1	1	0	0	1	5250	0	1	2.02119	1
0	0	0	1	0	0	0	0	0	0	1	0	0	1	1	0	1	1	5250	0	1	1.24304	2
0	0	0	1	0	0	0	0	0	1	0	0	0	1	1	#NULL!	0	1	7000	0	1	1.24304	2
0	0	0	0	0	0	0	0	0	0	1	0	0	1	1	0	0	1	4200	1	0	2.02119	3
0	0	0	1	0	1	0	0	0	1	1	0	0	1	1	0	0	1	7000	0	1	1.24304	2
0	0	0	1	0	0	0	0	0	0	1	0	0	1	1	0	0	0	5833.33	0	0	2.9798	3
0	0	0	1	0	0	1	0	0	0	0	0	0	1	1	0	1	0	5250	0	1	1.80371	2
0	1	0	0	0	0	0	0	1	0	1	0	0	1	1	0	0	0	7150	0	1	1.24304	3
0	1	1	0	0	0	0	0	0	1	0	0	0	1	1	0	0	0	14583.3	0	0	3.25855	3
0	1	0	0	0	0	0	0	0	0	0	0	0	1	1	0	0	0	7083.33	0	1	2.61662	1
0	1	1	0	0	1	1	0	0	1	0	0	0	1	1	0	1	0	5250	0	1	1.8451	2
0	1	0	1	0	1	1	1	0	0	0	0	1	1	1	1	0	0	9687.5	0	0	1.54407	2
0	1	1	0	0	1	1	1	0	0	0	0	0	1	1	0	0	0	9375	0	0	1.24304	2
0	1	0	0	0	1	1	0	0	0	0	0	0	1	1	0	0	0	3300	0	0	4.12799	1
0	1	0	0	0	1	1	0	0	0	0	0	0	1	1	0	0	0	10050	0	0	1.24304	3
0	1	1	0	0	1	1	0	0	0	0	0	0	1	1	0	1	0	11833.3	0	0	1.24304	3
0	1	1	0	0	1	1	0	0	0	0	0	0	1	1	0	0	0	5562.5	0	1	4.22777	3
0	1	0	0	0	1	1	0	0	0	0	0	1	1	1	1	0	0	5850	0	1	3.28083	3
0	1	1	0	0	1	1	0	0	0	0	0	1	1	1	0	0	0	7200	0	1	3.44716	1
0	1	0	0	0	0	1	0	0	0	0	0	0	1	1	0	0	0	7083.33	0	1	2.6902	1
1	1	0	0	0	0	1	0	0	1	0	0	0	1	1	0	1	0	10531.2	0	1	1.24304	1
0	1	1	0	0	1	1	0	1	0	0	0	0	1	1	1	0	0	7083.33	0	1	3.66999	1
0	1	0	1	0	1	1	0	1	0	0	1	0	1	1	0	0	0	9500	0	1	2.02119	1
0	1	1	1	0	0	0	0	0	0	1	#NULL!	#NULL!	#NULL!	#NULL!	#NULL!	#NULL!	1	2000	1	#NULL!	3.16543	#NULL!
0	1	1	0	0	0	0	0	0	1	1	0	0	1	1	0	0	1	7142.86	0	1	4.95904	2
0	1	0	0	0	0	0	0	0	1	1	0	0	1	1	0	0	1	12250	0	1	2.24304	1
0	1	1	1	0	0	1	0	0	0	0	1	1	1	1	0	0	0	11111.1	0	1	3.00647	1
0	1	1	0	0	0	0	0	1	0	1	0	0	1	1	0	0	0	5000	0	1	#NULL!	2
0	1	1	0	0	0	1	0	0	0	1	0	0	1	1	0	0	1	7000	1	1	1.24304	2
1	1	0	0	1	0	1	1	0	1	1	#NULL!	#NULL!	#NULL!	#NULL!	#NULL!	#NULL!	0	9062.5	1	#NULL!	4.20208	#NULL!
0	1	1	0	0	0	0	0	0	1	1	0	0	1	1	0	1	1	6666.67	0	1	3.36001	3
1	1	1	1	0	1	1	1	0	0	0	0	0	1	0	0	0	0	3593.75	0	1	2.14613	1
0	1	0	1	0	0	1	0	0	0	1	0	1	1	1	1	1	1	5000	0	1	3.37658	1
0	1	0	1	0	0	0	0	0	1	1	0	0	1	1	0	0	1	4000	0	1	3.7068	2
0	1	1	1	0	0	0	0	0	1	0	0	0	1	1	0	1	0	24583.3	0	1	3.92428	2
1	1	0	0	0	1	1	1	0	0	0	1	0	1	1	0	0	0	7250	0	1	3.19287	2
0	1	0	1	0	0	0	0	0	1	0	1	0	0	0	0	0	1	6666.67	0	1	1.24304	3
1	1	0	1	0	0	1	0	1	0	1	0	1	1	1	1	1	1	3931.82	0	1	2.38917	3
0	1	0	1	0	0	0	0	1	0	0	#NULL!	#NULL!	#NULL!	#NULL!	#NULL!	#NULL!	1	5000	0	#NULL!	#NULL!	#NULL!
0	1	0	0	0	0	0	0	0	0	1	0	0	1	1	1	0	0	4666.67	1	0	3.58546	#NULL!
0	1	1	0	0	0	0	0	0	0	1	0	0	1	1	1	0	1	5833.33	0	0	3.23507	1
0	1	0	1	0	0	0	1	0	0	1	0	0	1	1	1	0	1	7000	0	1	2.24304	1
1	1	0	0	0	0	1	0	0	1	1	0	1	1	1	0	0	1	4200	0	0	2.75795	2
0	1	1	1	0	0	0	0	0	0	0	0	0	1	1	0	0	1	7000	0	0	2.99123	3
0	1	0	0	0	0	0	0	1	1	1	0	0	1	1	0	0	1	5000	0	0	4.90009	2
1	1	0	1	0	0	0	0	0	0	0	0	0	0	1	1	1	1	3500	0	1	4.0225	2
0	1	0	0	0	0	0	0	0	1	1	0	0	1	1	1	1	0	7000	0	1	3.74819	1
0	1	0	0	0	0	1	0	0	1	0	0	0	1	1	0	0	1	5250	1	0	3.34777	3
0	1	0	1	0	0	0	0	0	1	0	0	0	1	1	1	0	0	7500	0	1	1.24304	2
0	1	0	1	0	0	1	0	0	1	1	0	0	1	1	0	0	0	2625	0	1	1.54407	1
0	1	0	1	0	0	1	0	0	0	0	0	0	1	1	0	1	0	7000	0	1	3.28443	1
0	1	0	1	0	0	0	0	0	1	1	0	0	1	1	0	0	1	8333.33	0	1	3.58149	2
0	1	0	1	0	1	1	1	0	0	1	0	0	1	1	1	0	0	7000	0	1	2.14613	2
0	1	0	0	0	0	0	0	1	1	1	0	0	1	1	0	0	0	6400	0	1	1.54407	2
0	1	0	1	0	0	0	0	0	1	0	0	0	1	1	0	0	0	5600	0	1	1.24304	1
1	1	0	0	0	0	1	0	0	1	1	0	0	1	1	0	1	1	11666.7	0	1	2.24304	1
0	1	1	1	0	0	1	1	0	1	0	0	0	1	1	0	1	0	7000	1	1	1.80371	2
0	1	1	1	0	0	1	0	1	1	1	0	1	1	1	1	1	1	7000	0	1	2.6902	3
0	1	0	1	0	0	0	0	0	1	1	0	1	1	1	0	0	0	5714.29	0	1	1.54407	1
1	1	0	1	#NULL!	#NULL!	#NULL!	#NULL!	#NULL!	#NULL!	0	0	0	1	1	0	0	0	12500	0	1	1.9798	1
0	1	0	0	0	0	0	0	0	1	0	0	0	1	1	0	0	1	5000	1	1	3.30886	1
0	1	0	1	#NULL!	#NULL!	#NULL!	#NULL!	#NULL!	#NULL!	1	0	0	1	1	0	1	0	5000	0	1	3.8451	2
0	1	0	1	0	0	0	0	1	1	0	0	0	1	1	1	0	0	5250	0	1	3.41649	3
0	1	0	1	0	0	0	0	0	1	1	0	0	1	1	0	1	0	10000	0	1	2.8644	#NULL!
0	1	0	1	0	0	1	0	1	0	1	1	1	1	1	1	0	0	8000	0	0	1.24304	3
0	1	0	1	0	0	1	0	1	1	0	0	0	1	1	1	0	0	7500	0	1	1.24304	2
0	1	0	0	0	0	1	0	0	1	1	0	0	1	1	0	1	1	6000	0	0	3.04674	3
0	1	0	0	0	0	0	0	0	1	0	0	0	1	1	1	0	1	11666.7	0	1	2.54407	2
0	1	0	1	0	1	1	0	0	1	0	0	1	1	1	1	0	0	5000	0	1	2.8451	2
0	1	0	0	0	0	0	0	1	1	0	0	0	1	1	0	0	0	6250	0	1	1.54407	2
0	1	0	0	0	0	0	0	1	1	0	0	0	1	1	1	1	1	10000	0	1	1.8451	2
0	1	0	1	0	1	1	1	0	0	0	1	1	1	1	0	0	0	7916.67	1	1	1.24304	1
0	1	0	0	0	1	1	0	0	0	1	0	1	1	1	0	0	0	10500	1	1	4.37658	3
0	1	0	1	0	0	0	0	1	1	1	0	1	1	1	1	0	1	5000	0	1	1.24304	1
0	1	0	1	1	1	1	1	0	0	0	0	0	1	1	0	0	0	9350	0	1	1.54407	3
0	1	1	0	0	0	1	0	0	0	0	0	1	1	1	0	1	0	10000	1	1	1.24304	1
0	1	1	1	0	1	1	1	0	0	0	1	#NULL!	1	1	0	0	0	6388.89	0	1	3.06258	2
0	1	0	0	0	0	1	0	0	1	1	0	0	1	1	1	0	0	8250	0	1	1.24304	3
0	1	1	0	0	0	1	0	1	0	1	0	0	1	1	0	0	0	15343.8	0	1	1.24304	1
0	1	0	1	0	1	1	0	0	0	0	0	1	1	1	0	0	0	5892.86	0	1	1.24304	3
0	1	1	0	0	1	1	0	0	0	0	0	0	1	1	0	0	0	11562.5	0	1	2.54407	1
0	1	0	1	1	0	0	0	1	1	1	0	0	1	1	1	0	0	2500	0	1	2.54407	3
0	1	0	1	0	1	1	0	0	0	1	1	1	1	1	0	0	0	5833.33	0	1	1.24304	2
0	1	0	1	0	0	0	0	0	1	0	0	0	1	1	1	0	1	6428.57	0	1	1.24304	3
1	1	0	1	0	0	0	0	1	1	1	0	1	1	1	0	0	0	3333.33	0	1	1.24304	2
0	1	1	1	0	0	1	0	0	1	0	0	0	1	1	0	0	0	5250	0	1	1.24304	1
0	0	0	1	0	0	0	0	1	1	1	0	1	1	1	1	0	1	7500	0	1	4.35698	2
0	0	0	1	0	0	0	0	0	1	1	0	0	1	1	0	0	1	2500	0	1	2.54407	2
0	0	0	0	1	1	1	1	0	0	0	1	0	1	1	0	0	0	14000	0	1	3.49831	3
0	0	0	1	0	0	0	0	0	1	1	0	0	1	1	0	0	1	3500	0	1	1.24304	1
0	0	1	1	0	0	0	0	0	0	0	0	0	1	1	0	1	1	8333.33	0	1	1.24304	3
0	0	1	0	0	0	0	0	0	0	0	0	0	1	1	1	0	1	8750	0	1	1.24304	2
0	0	1	0	0	0	0	0	0	0	1	0	0	1	1	0	0	1	5000	0	1	1.54407	1
0	0	1	1	0	0	0	0	0	0	1	0	0	1	1	1	1	1	7500	1	1	5.24304	1
0	0	0	1	0	0	0	0	0	0	0	0	0	1	1	0	0	1	6666.67	0	1	1.24304	3
0	0	1	1	0	0	0	0	0	1	1	0	0	1	1	0	0	1	5000	0	1	3.35698	2
0	0	1	1	1	0	0	0	1	1	1	0	0	1	1	0	0	1	5833.33	0	1	2.92428	3
0	0	0	1	0	0	0	0	0	0	1	0	0	1	1	0	0	1	8000	0	1	2.20165	1
1	0	0	1	0	0	0	0	0	0	0	0	0	1	1	1	0	1	6250	0	1	2.79934	2
0	0	0	1	1	1	1	1	0	0	0	0	0	1	1	0	1	0	11562.5	0	1	2.24304	2
1	0	0	1	0	0	0	0	1	1	1	0	0	1	0	0	0	1	4375	1	0	2.45692	2
0	0	1	1	0	0	0	0	0	1	0	0	0	1	1	1	0	1	4444.44	0	0	1.24304	2
0	0	0	1	0	0	0	0	1	1	1	0	0	1	1	0	0	1	4000	0	1	2.61662	1
1	0	0	1	0	1	0	0	0	0	1	0	0	1	1	1	0	1	7142.86	0	1	1.24304	3
1	0	0	1	0	0	0	0	0	1	1	0	0	1	1	0	0	1	4000	0	1	1.24304	1
0	0	1	1	1	0	0	0	0	1	0	1	0	1	1	0	0	0	6000	0	1	1.24304	3
0	0	0	1	0	0	0	0	0	0	1	0	0	1	1	1	1	1	8333.33	0	1	1.24304	2
0	0	0	1	0	0	0	0	0	1	0	0	0	1	1	0	0	1	8750	0	1	1.24304	3
1	0	1	1	0	1	0	0	0	1	1	0	0	1	1	0	1	1	8750	0	1	1.24304	1
0	0	1	0	0	0	0	0	0	1	1	0	0	1	1	0	0	1	3500	0	0	2.94983	2
0	0	0	0	0	0	0	0	0	1	0	1	0	1	1	1	0	1	2500	0	1	1.24304	3
0	0	0	1	0	0	0	0	0	1	1	0	0	1	1	0	0	1	5714.29	1	0	2.86629	3
0	0	0	1	0	0	0	0	1	1	1	0	0	1	1	0	0	1	5833.33	0	0	1.24304	2
0	0	0	1	0	0	0	0	0	1	1	0	0	0	1	1	0	1	2500	0	0	1.24304	2
0	0	1	0	0	0	0	0	0	1	1	0	0	1	1	0	0	1	2800	0	0	1.24304	3
0	0	0	1	0	0	0	0	0	0	1	0	0	0	1	1	0	1	8750	1	0	1.24304	1
0	0	0	0	0	0	0	0	1	1	1	0	0	1	1	0	0	1	5000	0	0	1.24304	3
0	0	0	1	0	0	0	0	1	0	1	0	0	1	1	1	0	1	7500	0	0	1.54407	3
0	0	0	0	0	0	0	0	0	1	1	1	0	1	1	0	0	0	11666.7	0	0	1.24304	2
0	0	0	1	0	0	0	0	0	0	1	1	0	1	1	1	0	1	8000	0	1	3.45788	2
0	0	0	0	1	0	0	0	0	0	1	1	0	1	1	1	0	1	7000	0	1	1.54407	2
0	0	0	0	0	1	0	0	1	1	1	0	0	1	1	0	0	1	6000	0	0	2.99123	3
0	0	0	0	0	0	0	0	1	1	1	0	0	1	1	1	1	1	5000	0	1	3.73056	3
0	0	1	1	0	1	0	0	1	1	1	0	0	1	1	0	0	1	3750	0	1	4.82737	2
0	0	0	0	0	0	0	0	0	0	1	0	0	1	1	0	0	0	7000	0	1	2.88649	3
0	0	0	0	0	1	0	0	1	1	1	0	0	1	1	1	1	0	8750	0	1	1.24304	3
0	0	0	1	0	0	0	0	1	1	0	1	0	1	1	0	0	1	4200	0	1	1.24304	3
0	0	0	1	0	0	0	0	0	0	1	1	0	1	1	0	0	1	6250	0	1	1.24304	2
0	0	0	0	0	0	0	0	0	1	1	1	0	1	1	0	0	1	2500	0	1	1.24304	3
0	0	0	0	0	0	0	0	0	1	1	1	0	1	1	0	0	1	7000	0	1	3.48359	3
0	0	0	0	0	0	0	0	1	1	0	1	0	1	1	0	0	1	3333.33	0	1	1.24304	2
0	0	1	1	0	0	0	0	1	0	0	1	0	1	1	1	0	1	6666.67	0	1	3.05898	3
0	0	0	1	0	1	1	0	0	0	0	0	0	1	0	0	0	0	#NULL!	0	1	3.39477	2
1	0	0	1	1	1	0	0	0	0	1	0	0	1	1	0	0	1	4375	0	1	1.8451	3
0	0	0	1	0	0	1	0	1	0	0	0	0	1	1	0	0	1	4166.67	0	1	1.24304	2
0	0	0	1	0	1	0	0	1	0	0	0	0	1	1	1	0	1	7000	1	1	1.24304	2
1	0	1	1	0	0	0	0	1	0	0	0	0	1	1	0	1	1	5000	0	1	2.44716	2
0	0	0	1	0	0	0	0	0	0	1	0	0	1	1	1	0	0	7000	1	1	1.54407	3
0	0	0	1	0	0	0	0	1	1	1	0	0	1	1	0	0	1	7000	0	1	2.54407	1
0	0	0	1	1	1	0	0	0	0	1	0	0	1	1	0	0	1	11666.7	0	1	3.00647	2
0	0	0	0	0	0	0	0	0	0	1	0	1	1	1	0	0	0	4000	0	1	3.02119	3
0	0	1	1	0	0	0	0	1	1	1	0	0	1	1	1	0	1	3571.43	0	1	1.24304	1
0	0	1	1	0	0	0	0	0	0	1	0	0	1	1	0	0	1	5000	0	1	1.24304	2
0	0	0	1	0	1	1	1	0	0	1	0	0	1	1	0	0	0	7000	0	1	1.24304	3
0	0	1	1	0	0	0	0	0	1	0	0	0	1	1	1	0	1	7500	1	1	1.54407	2
0	0	0	1	0	0	0	0	0	1	1	0	0	1	1	1	0	1	5714.29	0	1	1.54407	3
0	0	1	1	0	0	0	0	0	0	1	0	0	1	1	0	0	0	5555.56	0	1	1.54407	3
0	1	1	0	0	0	1	1	0	0	1	1	0	1	1	0	0	0	7812.5	0	1	1.24304	1
0	1	0	1	0	1	1	1	0	0	1	0	0	1	1	0	0	0	6166.67	0	1	1.24304	2
0	1	0	0	0	1	1	1	0	0	0	1	1	1	0	0	0	0	7500	0	1	3.80587	2
0	1	0	0	1	0	1	0	0	1	1	0	1	1	1	1	1	0	4166.67	0	1	4.0529	1
0	1	0	0	0	1	1	1	0	0	0	1	0	1	0	0	1	0	2571.43	0	1	2.14613	1
0	1	0	0	0	0	1	0	0	1	1	0	0	1	0	0	0	0	5833.33	0	1	1.24304	3
1	1	1	0	0	1	1	0	0	1	1	0	1	1	1	0	0	0	5050	1	1	2.82489	2
1	1	0	0	0	0	0	0	0	1	0	0	0	1	0	0	0	0	1750	0	1	3.44716	3
0	1	1	0	0	0	0	0	0	1	0	0	0	1	1	0	0	1	2625	0	1	1.24304	1
1	1	0	0	0	0	0	0	1	1	0	0	0	1	1	1	0	1	6666.67	0	1	1.24304	1
0	1	0	0	0	0	0	0	1	1	0	0	1	1	1	1	0	1	11666.7	0	1	3.83914	2
0	1	0	0	0	0	0	0	0	1	0	0	0	1	1	0	0	0	8937.5	0	1	3.4939	1
1	1	0	0	0	0	0	0	0	1	0	0	1	1	1	0	0	0	11916.7	1	1	1.54407	1
1	1	0	0	0	0	0	0	0	1	1	0	0	1	1	0	0	1	7000	0	1	4.8704	1
0	1	1	0	0	0	0	0	0	1	1	0	0	1	1	0	0	1	8166.67	0	1	4.74819	1
1	1	0	0	0	0	0	0	0	1	1	0	0	1	1	1	0	1	7000	0	1	3.11546	3
0	1	0	0	0	0	0	0	1	1	1	0	0	1	1	0	1	1	4200	1	1	3.7531	1
0	1	0	0	0	0	0	0	0	1	0	0	0	1	1	0	1	1	4000	0	1	3.73312	2
0	1	1	1	0	0	0	0	0	1	1	0	0	1	1	0	0	1	2625	1	1	5.24304	3
0	1	0	0	0	0	0	0	0	0	0	0	0	1	1	1	0	1	6000	0	1	1.54407	1
1	1	0	0	0	0	0	0	0	1	1	0	0	1	1	0	1	0	7000	0	1	1.24304	2
1	1	0	0	0	0	1	0	0	1	1	0	0	1	1	0	0	0	5000	1	1	1.24304	1
0	1	0	1	0	0	0	0	0	1	1	0	0	1	1	1	0	1	78.5714	1	1	2.10474	3
0	1	0	0	0	0	1	0	0	1	1	0	0	1	1	0	1	1	7000	0	1	3.32222	1
1	1	0	1	0	0	1	0	0	0	0	0	0	1	1	1	1	0	9062.5	0	1	1.8451	2
1	1	1	1	0	0	1	0	1	1	1	0	0	1	1	1	1	1	6250	0	1	3.28443	3
0	1	1	1	0	0	0	0	0	0	1	0	0	1	0	0	0	1	4000	1	1	2.24304	1
1	1	0	0	0	0	1	0	0	0	1	0	0	1	0	0	0	0	3500	0	1	1.24304	1
1	1	0	1	0	0	0	0	0	0	0	0	0	1	0	0	1	1	4500	0	1	2.32222	2
1	1	0	0	0	0	1	0	1	0	0	0	0	1	0	0	0	0	11666.7	0	1	1.24304	1
0	1	0	1	1	0	0	0	1	0	0	0	0	1	1	0	1	1	5000	1	1	3.91092	3
0	1	0	1	0	0	1	0	0	0	1	0	0	1	0	0	0	0	14000	1	1	1.9798	2
0	1	0	0	0	1	0	0	0	0	0	0	0	1	0	0	0	1	3500	1	1	1.24304	3
1	1	1	0	0	0	0	0	0	0	1	0	0	1	0	0	0	1	5600	0	1	4.14613	3
0	1	0	0	1	1	1	0	0	1	1	0	0	1	0	0	0	0	#NULL!	0	1	3.4014	3
0	1	1	0	1	1	1	0	0	1	1	0	0	1	0	0	0	0	3500	1	1	3.52634	1
0	1	0	0	1	1	1	0	0	1	1	0	0	1	0	0	0	0	1250	0	1	4.03822	3
0	1	0	0	1	1	1	0	0	1	1	0	0	1	0	0	0	0	1250	0	1	2.24304	1
1	1	0	1	0	1	1	1	0	0	0	0	1	1	0	0	0	0	1250	0	1	2.14613	2
0	1	0	1	0	0	0	0	0	0	1	0	0	1	0	0	0	1	1909.09	0	1	1.24304	1
0	1	0	1	0	0	1	0	0	0	0	0	0	1	0	1	0	1	2333.33	0	1	2.58546	3
0	1	0	1	0	1	1	0	0	0	1	0	0	1	0	0	0	0	8166.67	1	1	1.80371	3
0	1	0	0	0	0	1	0	0	0	0	0	0	1	0	0	0	0	8750	0	1	3.02119	3
0	1	0	1	0	0	1	0	0	0	1	0	0	1	0	0	0	1	1500	0	1	2.45692	1
0	1	0	0	1	0	0	0	0	1	0	0	0	1	0	0	0	1	4200	0	1	3.10037	3
0	1	1	1	0	0	0	0	0	0	0	0	0	1	0	0	1	1	583.333	0	1	1.54407	2
0	1	0	1	0	1	0	0	0	0	0	0	0	1	0	0	0	1	2000	1	1	1.54407	3
0	1	1	1	0	0	0	0	0	0	1	0	0	1	0	0	1	1	7000	0	1	3.12592	3
0	1	0	1	0	1	0	0	1	0	1	0	0	1	0	0	0	1	1000	0	1	3.22531	2
0	1	1	1	0	0	0	0	0	0	0	0	0	1	0	0	0	1	7000	0	1	1.8451	2
1	1	1	1	0	0	0	0	1	0	0	0	0	1	0	0	0	0	10000	0	1	3.16732	#NULL!
0	1	1	1	0	1	1	0	1	0	0	1	1	1	0	0	1	0	5000	0	1	3.24304	2
0	1	0	1	0	0	0	0	0	0	1	0	0	1	0	0	0	1	1166.67	0	1	2.90062	3
0	1	1	1	0	0	1	0	0	0	0	0	1	1	0	0	0	0	833.333	1	1	2.38917	2
0	1	0	1	0	0	0	0	0	0	1	0	0	1	0	0	0	1	3500	0	1	2.92428	2
0	1	0	1	0	1	1	0	0	0	1	0	0	1	0	0	0	0	333.333	0	1	2.02119	3
0	1	0	1	0	0	1	0	0	0	0	1	0	1	0	0	0	0	5000	0	1	3.507	3
0	1	1	0	0	0	0	0	0	0	0	0	1	1	0	0	0	0	7000	0	1	3.87559	3
0	1	0	1	0	0	0	0	0	0	1	0	0	1	0	0	0	0	428.571	0	1	1.24304	2
0	1	0	1	0	0	0	0	0	0	0	0	0	1	1	0	0	1	8750	0	1	4.20208	1
0	1	0	1	0	1	1	0	0	0	0	0	0	1	0	0	0	0	7000	0	1	1.24304	2
0	1	1	1	0	0	0	0	1	0	0	0	1	1	1	0	0	0	5833.33	0	1	1.8451	3
0	1	1	1	0	1	0	0	0	0	1	0	0	1	0	0	1	1	600	0	1	2.75795	3
0	1	1	0	0	0	0	0	1	0	1	0	0	1	1	0	0	1	1250	0	1	2.88649	3
1	1	1	0	0	1	1	1	0	0	0	0	1	1	0	0	0	0	3250	0	1	2.82282	3
0	1	1	0	0	1	1	1	1	0	1	1	0	1	1	0	1	0	12500	0	1	2.74819	1
1	1	0	1	0	0	0	0	1	0	1	1	0	1	0	0	0	0	525	0	1	3.6394	2
0	1	0	0	0	0	0	0	0	0	1	0	0	1	0	0	0	1	11666.7	0	1	3.14613	3
0	1	1	1	0	0	0	0	0	1	1	0	0	1	0	0	0	0	4666.67	0	1	2.73312	3
0	1	0	0	0	0	0	0	0	0	0	0	0	1	1	1	0	1	17500	0	1	1.8451	1
0	1	1	1	0	0	0	0	0	0	1	0	0	1	0	0	0	1	2333.33	0	1	2.54407	3
0	1	1	1	0	1	0	0	0	0	0	0	0	1	0	1	0	1	3636.36	0	1	1.24304	2
0	1	0	1	0	0	0	0	1	0	1	0	0	1	1	0	0	1	6125	1	1	3.9058	3
1	1	0	0	0	0	0	0	0	0	1	0	0	1	0	0	0	1	5000	0	0	3.04674	3
0	1	1	0	0	1	1	1	0	0	1	0	0	1	1	0	1	0	5000	0	1	2.58546	3
0	1	0	#NULL!	1	#NULL!	#NULL!	#NULL!	#NULL!	#NULL!	1	0	0	1	0	1	0	1	2000	0	0	3.89432	3
0	1	0	#NULL!	0	#NULL!	#NULL!	#NULL!	#NULL!	#NULL!	1	0	0	1	0	0	0	1	1400	0	0	3.52386	2
0	1	0	1	0	0	0	0	0	0	1	0	0	1	0	0	0	1	5833.33	0	0	1.24304	3
1	1	0	1	0	0	0	0	0	0	0	0	0	1	0	1	0	1	2800	0	0	1.24304	3
0	1	1	1	0	0	0	0	1	0	1	0	1	1	1	1	0	1	4200	0	0	3.24304	#NULL!
0	0	0	1	0	1	1	1	0	0	0	1	0	1	0	0	0	0	9800	0	1	1.24304	1
0	0	1	0	0	1	1	0	0	0	0	0	0	1	1	0	1	1	7000	0	1	1.54407	1
0	0	0	0	0	0	0	0	0	0	1	0	0	1	0	0	0	0	4200	0	1	4.14176	1
0	0	0	0	0	0	0	0	0	0	1	0	0	1	0	0	0	1	7000	0	1	1.54407	1
0	0	0	1	0	0	0	0	0	0	0	0	1	1	0	0	0	1	4166.67	0	1	3.6994	3
0	0	0	1	0	0	0	0	0	0	1	0	0	1	0	0	0	0	8750	0	1	1.80371	3
0	0	1	0	0	0	0	0	1	0	1	0	0	1	0	0	0	0	3500	1	1	2.97543	2
0	0	1	1	0	0	0	0	0	0	1	0	0	1	1	1	0	1	5250	0	1	2.02119	1
0	0	0	0	1	0	0	0	0	0	1	0	0	1	0	0	0	1	3500	0	1	2.14613	1
0	0	1	0	0	0	1	0	0	0	1	0	0	1	1	0	0	0	5500	0	1	3.60477	1
0	0	1	1	0	0	1	0	0	0	1	0	0	1	0	1	0	1	4083.33	0	1	3.38917	1
0	0	0	1	0	0	0	0	0	0	1	0	0	0	0	0	0	1	2800	0	1	3.41913	1
0	0	0	1	0	0	0	0	0	1	1	0	0	1	0	1	0	0	7000	0	0	1.8451	3
0	0	0	1	0	0	0	0	0	0	1	0	0	1	0	0	0	1	4375	0	0	2.62325	2
0	0	1	1	0	1	0	0	0	0	1	0	0	1	1	0	0	1	5000	0	0	1.54407	3
0	0	0	1	0	1	0	0	0	0	1	0	0	1	0	0	0	1	4666.67	0	0	1.24304	2
0	0	0	0	0	1	0	0	0	0	0	0	0	1	1	0	0	1	5000	0	0	1.24304	2
0	0	0	1	0	1	0	0	0	0	1	0	0	1	0	0	0	1	3500	0	1	1.24304	3
0	0	0	1	0	0	0	0	0	0	0	0	0	1	1	0	0	1	5833.33	0	1	3.53084	3
1	0	0	1	0	0	0	0	0	0	0	0	0	1	0	0	1	1	2333.33	0	1	1.54407	1
0	0	1	0	0	1	0	0	0	0	1	0	0	1	0	0	0	0	4200	0	1	3.72016	3
0	0	1	1	0	0	0	0	0	1	1	0	0	1	0	0	0	1	3888.89	0	1	2.24304	3
0	0	1	0	0	0	0	0	0	1	0	0	0	1	0	0	0	1	6000	0	1	3.76985	3
0	0	0	1	1	0	0	0	0	0	1	0	0	0	0	0	0	1	4666.67	0	1	1.24304	2
0	0	1	1	0	1	1	0	0	0	1	1	0	1	0	0	0	0	5000	0	1	1.54407	1
0	0	1	1	#NULL!	#NULL!	#NULL!	#NULL!	#NULL!	#NULL!	1	0	0	1	1	0	0	1	3125	0	0	2.58546	3
0	0	1	1	0	0	0	0	0	0	0	0	0	1	0	0	0	1	7000	0	1	1.24304	1
0	0	0	1	0	0	0	0	0	0	0	0	0	1	0	0	0	0	5600	0	1	2.96507	2
0	0	1	1	0	0	0	0	0	0	1	0	0	1	1	0	0	1	4666.67	0	0	1.24304	3
0	0	1	1	1	0	0	0	0	0	1	0	0	1	0	0	0	1	4666.67	0	0	1.54407	3
0	0	0	1	0	0	0	0	1	0	1	1	0	1	0	0	0	1	3500	0	0	3.00783	3
0	0	1	1	0	0	0	0	0	0	1	0	0	1	1	0	0	1	7000	0	0	1.24304	#NULL!
0	0	0	1	1	0	0	0	1	0	1	0	0	1	1	0	0	0	4000	0	1	2.8451	3
0	0	0	1	0	0	1	0	0	0	0	0	0	1	1	0	0	1	1750	0	1	2.62325	1
0	0	0	0	0	0	0	0	0	0	1	1	0	1	1	0	0	1	5600	0	1	3.54407	3
0	0	0	0	0	0	0	0	0	0	1	0	0	1	0	0	0	1	5250	0	0	4.20208	2
1	0	0	1	0	0	0	0	1	0	1	0	0	1	1	0	0	0	4200	0	1	3.37191	2
0	0	0	1	0	0	0	0	0	0	1	0	0	1	1	0	0	0	6666.67	0	1	1.24304	3
0	0	0	1	0	0	0	0	0	0	1	0	0	1	0	0	0	0	7000	0	1	4.20208	3
0	0	0	1	0	0	0	0	0	0	1	0	0	1	1	0	0	1	4200	0	1	2.62325	3
0	0	0	1	0	1	1	1	0	0	1	1	0	1	1	0	0	0	5541.67	0	1	2.28083	2
0	0	0	1	0	0	0	0	1	0	1	1	0	1	1	0	0	1	5000	0	1	1.9798	2
0	0	0	1	0	0	0	0	0	0	1	1	0	1	0	0	0	0	4375	0	1	1.24304	3
0	0	0	1	0	1	1	0	0	0	0	0	0	1	0	0	0	0	3500	0	0	1.24304	3
0	0	0	1	0	0	0	0	0	0	0	0	0	1	0	0	0	0	4200	0	0	1.24304	3
0	0	0	1	0	0	0	0	0	0	1	1	0	1	0	0	0	0	3500	0	1	2.34777	2
0	0	0	1	0	0	1	0	1	0	0	1	0	1	0	1	0	0	11666.7	0	1	3.39477	2
0	0	1	1	0	0	0	0	0	0	1	1	0	1	1	0	1	0	7000	0	1	1.80371	1
0	0	0	0	0	0	0	0	0	0	1	0	0	1	1	0	0	1	8750	0	1	1.80371	3
1	0	0	0	1	0	0	0	0	0	1	0	0	1	0	0	0	0	5714.29	0	1	2.02119	3
0	0	1	1	0	0	0	0	0	0	0	0	0	1	1	0	0	0	7000	0	1	1.54407	1
0	0	0	1	0	0	0	0	1	0	1	0	0	1	1	0	0	1	7000	0	1	3.23507	3
0	0	0	1	0	0	0	0	0	0	1	0	1	0	1	0	0	1	2800	0	1	2.75795	2
0	0	0	1	0	0	0	0	0	0	1	0	0	1	1	0	0	1	6250	0	1	2.9798	2
0	0	1	1	0	0	0	0	0	0	1	0	#NULL!	1	1	0	0	0	3500	0	1	3.88107	3
0	1	0	1	0	1	1	0	0	0	0	1	0	1	1	0	0	0	3134.62	0	1	2.32222	1
1	1	0	0	0	0	0	0	0	0	0	0	0	1	0	0	0	0	4666.67	0	1	3.08246	1
0	1	0	1	0	0	0	0	1	0	1	0	0	1	1	0	0	1	3000	0	1	2.02119	1
0	1	0	1	0	0	1	0	0	0	1	0	0	1	1	0	0	1	4375	0	1	1.24304	1
0	0	1	1	0	0	0	0	0	0	1	0	0	1	1	0	0	1	7500	0	0	2.67877	2
0	0	1	1	0	1	1	0	0	0	1	1	1	1	1	0	0	0	5000	0	1	1.24304	3
0	0	1	1	1	1	0	0	0	0	1	0	0	1	1	0	0	1	2083.33	0	1	1.24304	2
0	0	1	1	0	0	0	0	0	1	1	0	0	1	1	0	0	1	3500	0	1	1.24304	2
1	1	0	1	0	1	1	1	0	0	1	0	0	1	1	0	0	0	12500	0	1	2.02119	1
0	1	0	1	0	0	0	0	1	0	1	0	0	1	1	0	0	0	0	0	0	5.24304	3
0	1	0	1	0	0	1	0	0	0	1	0	1	1	1	1	0	0	3846.15	0	1	2.02119	1
0	1	0	0	0	1	1	0	0	0	1	0	0	1	1	0	0	0	5250	0	1	1.24304	2
0	1	0	1	0	0	0	0	0	0	1	0	0	1	1	0	0	1	4285.71	0	0	2.02119	3
1	1	1	1	0	0	1	0	0	0	1	0	0	1	1	0	0	1	7000	0	0	2.73312	3
0	1	0	1	0	0	1	0	0	0	1	0	0	1	1	0	0	0	13750	0	0	1.54407	3
0	1	0	1	0	1	1	0	0	0	1	0	0	1	1	0	0	0	6785.71	0	0	3.08814	2
0	1	0	1	0	0	0	0	0	0	1	0	0	1	1	0	0	1	3333.33	0	0	1.24304	3
1	1	1	1	0	0	0	0	0	0	0	0	0	1	1	0	0	1	4444.44	0	0	2.49831	3
0	1	0	0	0	0	0	0	0	0	1	0	0	1	1	0	0	1	7000	0	0	2.54407	2
